# Supplementary material for: The First Phytochemical Investigation of Artemisia divaricate: Sesquiterpenes and Their Anti-Inflammatory Activity
Source: MDPI journal article supplement (doi:10.3390/molecules28104254), 2023-05-22
Supplement: s1 [file s1]

## Supplementary data for

# The first phytochemical investigation of *Artemisia divaricate*: sesquiterpenes and their anti-inflammatory activity

Siqi Yan <sup>1,2,3</sup>, Changqiang Ke <sup>1,2</sup>, Zheling Feng <sup>1,2</sup>, Chunping Tang <sup>1,2,\*</sup> and Yang Ye <sup>1,2,3,4,\*</sup>

<sup>1</sup> State Key Laboratory of Drug Research, Shanghai Institute of Materia Medica, Chinese Academy of Sciences, Shanghai 201203, China; s20-yansiqi@simmm.ac.cn (S.Y.); kechangqiang@simmm.ac.cn (C.K.); fengzheling@simmm.ac.cn (Z.F.)

<sup>2</sup> Natural Products Chemistry Department, Shanghai Institute of Materia Medica, Chinese Academy of Sciences, Shanghai 201203, China

<sup>3</sup> University of Chinese Academy of Sciences, No. 19A Yuquan Road, Beijing 100049, China

<sup>4</sup> School of Life Science and Technology, ShanghaiTech University, Shanghai 201203, China

\* Correspondence: tangcp@simmm.ac.cn (C.T.); yye@simmm.ac.cn (Y.Y.)

## Contents

|                                                                                |    |
|--------------------------------------------------------------------------------|----|
| <b>Figure S1</b> Structures of known compounds 10-39.....                      | 1  |
| <b>Figure S2</b> HR-ESIMS spectrum of compound 1.....                          | 2  |
| <b>Figure S3</b> $^1\text{H}$ NMR spectrum of compound 1.....                  | 2  |
| <b>Figure S4</b> $^{13}\text{C}$ NMR spectrum of compound 1.....               | 3  |
| <b>Figure S5</b> HSQC spectrum of compound 1.....                              | 3  |
| <b>Figure S6</b> $^1\text{H}$ - $^1\text{H}$ COSY spectrum of compound 1.....  | 4  |
| <b>Figure S7</b> HMBC spectrum of compound 1.....                              | 4  |
| <b>Figure S8</b> NOESY spectrum of compound 1.....                             | 5  |
| <b>Figure S9</b> IR spectrum of compound 1.....                                | 5  |
| <b>Figure S10</b> HR-ESIMS spectrum of compound 2.....                         | 6  |
| <b>Figure S11</b> $^1\text{H}$ NMR spectrum of compound 2.....                 | 6  |
| <b>Figure S12</b> $^{13}\text{C}$ NMR spectrum of compound 2.....              | 7  |
| <b>Figure S13</b> HSQC spectrum of compound 2.....                             | 7  |
| <b>Figure S14</b> $^1\text{H}$ - $^1\text{H}$ COSY spectrum of compound 2..... | 8  |
| <b>Figure S15</b> HMBC spectrum of compound 2.....                             | 8  |
| <b>Figure S16</b> NOESY spectrum of compound 2.....                            | 9  |
| <b>Figure S17</b> IR spectrum of compound 2.....                               | 9  |
| <b>Figure S18</b> Possible isomers of compound 1 and 2.....                    | 10 |
| <b>Figure S19</b> DP4+ probability statistics of compound 1.....               | 10 |
| <b>Figure S20</b> DP4+ probability statistics of compound 2.....               | 10 |
| <b>Figure S21</b> HR-ESIMS spectrum of compound 3.....                         | 11 |
| <b>Figure S22</b> $^1\text{H}$ NMR spectrum of compound 3.....                 | 11 |
| <b>Figure S23</b> $^{13}\text{C}$ NMR spectrum of compound 3.....              | 12 |
| <b>Figure S24</b> HSQC NMR spectrum of compound 3.....                         | 12 |
| <b>Figure S25</b> $^1\text{H}$ - $^1\text{H}$ COSY spectrum of compound 3..... | 13 |
| <b>Figure S26</b> HMBC spectrum of compound 3.....                             | 13 |
| <b>Figure S27</b> NOESY spectrum of compound 3.....                            | 14 |
| <b>Figure S28</b> IR spectrum of compound 3.....                               | 14 |
| <b>Figure S29</b> HR-ESIMS spectrum of compound 4.....                         | 15 |
| <b>Figure S30</b> $^1\text{H}$ NMR spectrum of compound 4.....                 | 15 |
| <b>Figure S31</b> $^{13}\text{C}$ NMR spectrum of compound 4.....              | 16 |
| <b>Figure S32</b> HSQC spectrum of compound 4.....                             | 16 |
| <b>Figure S33</b> $^1\text{H}$ - $^1\text{H}$ COSY spectrum of compound 4..... | 17 |
| <b>Figure S34</b> HMBC spectrum of compound 4.....                             | 17 |
| <b>Figure S35</b> NOESY spectrum of compound 4.....                            | 18 |
| <b>Figure S36</b> IR spectrum of compound 4.....                               | 18 |

|                                                                                |    |
|--------------------------------------------------------------------------------|----|
| <b>Figure S37</b> Possible isomers of compound 4.....                          | 19 |
| <b>Figure S38</b> DP4+ probability statistics of compound 4.....               | 19 |
| <b>Figure S39</b> HR-ESIMS spectrum of compound 5.....                         | 20 |
| <b>Figure S40</b> $^1\text{H}$ NMR spectrum of compound 5.....                 | 20 |
| <b>Figure S41</b> $^{13}\text{C}$ NMR spectrum of compound 5.....              | 21 |
| <b>Figure S42</b> HSQC spectrum of compound 5.....                             | 21 |
| <b>Figure S43</b> $^1\text{H}$ - $^1\text{H}$ COSY spectrum of compound 5..... | 22 |
| <b>Figure S44</b> HMBC spectrum of compound 5.....                             | 22 |
| <b>Figure S45</b> NOESY spectrum of compound 5.....                            | 23 |
| <b>Figure S46</b> IR spectrum of compound 5.....                               | 23 |
| <b>Figure S47</b> Possible isomers of compound 5.....                          | 24 |
| <b>Figure S48</b> DP4+ probability statistics of compound 5.....               | 24 |
| <b>Figure S49</b> HR-ESIMS spectrum of compound 6.....                         | 25 |
| <b>Figure S50</b> $^1\text{H}$ NMR spectrum of compound 6.....                 | 25 |
| <b>Figure S51</b> $^{13}\text{C}$ NMR spectrum of compound 6.....              | 26 |
| <b>Figure S52</b> HSQC spectrum of compound 6.....                             | 26 |
| <b>Figure S53</b> $^1\text{H}$ - $^1\text{H}$ COSY spectrum of compound 6..... | 27 |
| <b>Figure S54</b> HMBC spectrum of compound 6.....                             | 27 |
| <b>Figure S55</b> NOESY spectrum of compound 6.....                            | 28 |
| <b>Figure S56</b> IR spectrum of compound 6.....                               | 28 |
| <b>Figure S57</b> Possible isomers of compound 6.....                          | 29 |
| <b>Figure S58</b> DP4+ probability statistics of compound 6.....               | 29 |
| <b>Figure S59</b> HR-ESIMS spectrum of compound 7.....                         | 30 |
| <b>Figure S60</b> $^1\text{H}$ NMR spectrum of compound 7.....                 | 30 |
| <b>Figure S61</b> $^{13}\text{C}$ NMR spectrum of compound 7.....              | 31 |
| <b>Figure S62</b> HSQC spectrum of compound 7.....                             | 31 |
| <b>Figure S63</b> $^1\text{H}$ - $^1\text{H}$ COSY spectrum of compound 7..... | 32 |
| <b>Figure S64</b> HMBC spectrum of compound 7.....                             | 32 |
| <b>Figure S65</b> NOESY spectrum of compound 7.....                            | 33 |
| <b>Figure S66</b> IR spectrum of compound 7.....                               | 33 |
| <b>Figure S67</b> Possible isomers of compound 7.....                          | 34 |
| <b>Figure S68</b> DP4+ probability statistics of compound 7.....               | 34 |
| <b>Figure S69</b> HR-ESIMS spectrum of compound 8.....                         | 35 |
| <b>Figure S70</b> $^1\text{H}$ NMR spectrum of compound 8.....                 | 35 |
| <b>Figure S71</b> $^{13}\text{C}$ NMR spectrum of compound 8.....              | 36 |
| <b>Figure S72</b> HSQC spectrum of compound 8.....                             | 36 |
| <b>Figure S73</b> $^1\text{H}$ - $^1\text{H}$ COSY spectrum of compound 8..... | 37 |

|                                                                                        |    |
|----------------------------------------------------------------------------------------|----|
| <b>Figure S74</b> HMBC spectrum of compound <b>8</b> .....                             | 37 |
| <b>Figure S75</b> NOESY spectrum of compound <b>8</b> .....                            | 38 |
| <b>Figure S76</b> IR spectrum of compound <b>8</b> .....                               | 38 |
| <b>Figure S77</b> Possible isomers of compound <b>8</b> .....                          | 39 |
| <b>Figure S78</b> DP4+ probability statistics of compound <b>8</b> .....               | 39 |
| <b>Figure S79</b> HR-ESIMS spectrum of compound <b>9</b> .....                         | 40 |
| <b>Figure S80</b> $^1\text{H}$ NMR spectrum of compound <b>9</b> .....                 | 40 |
| <b>Figure S81</b> $^{13}\text{C}$ NMR spectrum of compound <b>9</b> .....              | 41 |
| <b>Figure S82</b> HSQC spectrum of compound <b>9</b> .....                             | 41 |
| <b>Figure S83</b> $^1\text{H}$ - $^1\text{H}$ COSY spectrum of compound <b>9</b> ..... | 42 |
| <b>Figure S84</b> HMBC spectrum of compound <b>9</b> .....                             | 42 |
| <b>Figure S85</b> NOESY spectrum of compound <b>9</b> .....                            | 43 |
| <b>Figure S86</b> IR spectrum of compound <b>9</b> .....                               | 43 |
| <b>Figure S87</b> Possible isomers of compound <b>9</b> .....                          | 44 |
| <b>Figure S88</b> DP4+ probability statistics of compound <b>9</b> .....               | 44 |



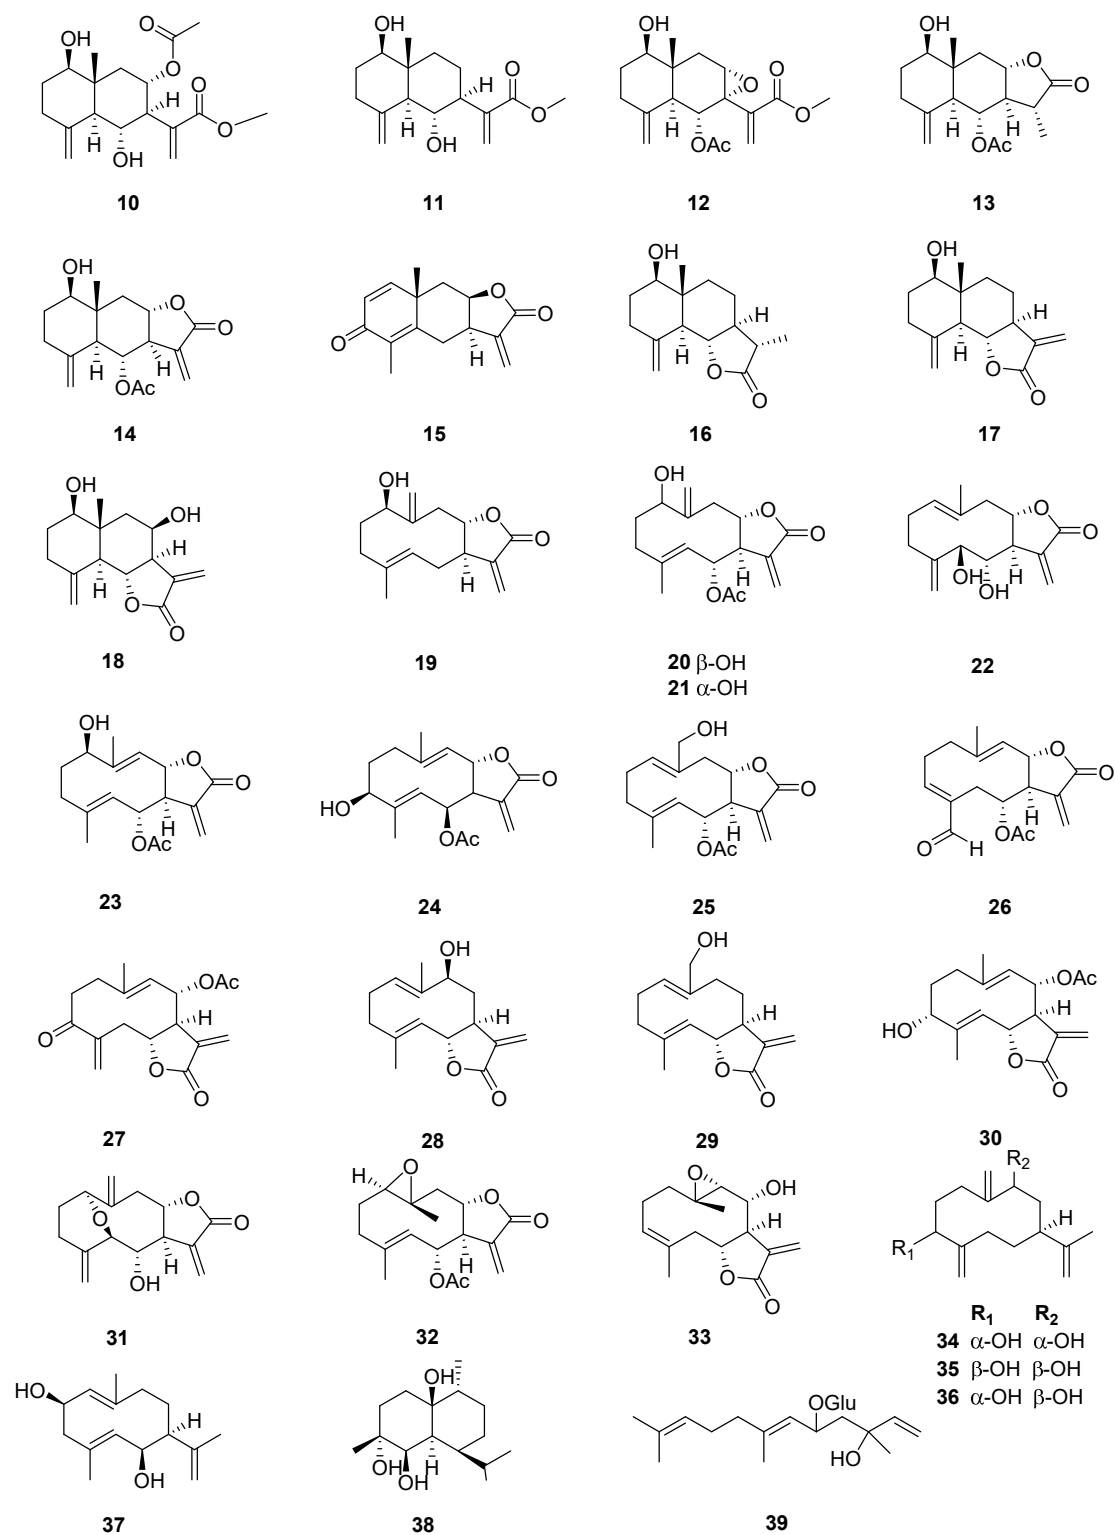

**Figure S1** Structures of known compounds 10-39

# Elemental Composition Report

Tolerance = 20.0 PPM / DBE: min = -1.5, max = 50.0

Element prediction: Off

Number of isotope peaks used for i-FIT = 3

Monoisotopic Mass, Even Electron Ions

66 formula(e) evaluated with 2 results within limits (up to 50 best isotopic matches for each mass)

Elements Used:

C: 0-200 H: 0-60 O: 0-6 Na: 0-1

Minimum: 80.00

-1.5

Maximum: 100.00

2.0

20.0

50.0

| Mass     | RA     | Calc. Mass | mDa | PPM  | DBE | i-FIT | Norm  | Conf(%) | Formula                                           |
|----------|--------|------------|-----|------|-----|-------|-------|---------|---------------------------------------------------|
| 375.1855 | 100.00 | 375.1784   | 7.1 | 18.9 | 5.5 | 40.1  | 0.164 | 84.84   | C <sub>19</sub> H <sub>28</sub> O <sub>6</sub> Na |
|          |        | 375.1808   | 4.7 | 12.5 | 8.5 | 41.9  | 1.887 | 15.16   | C <sub>21</sub> H <sub>27</sub> O <sub>6</sub>    |

YSQ

AD-B2G4C2E1-Pos 742 (5.423) Cm (741:743)

1: TOF MS ES+

3.62e+006

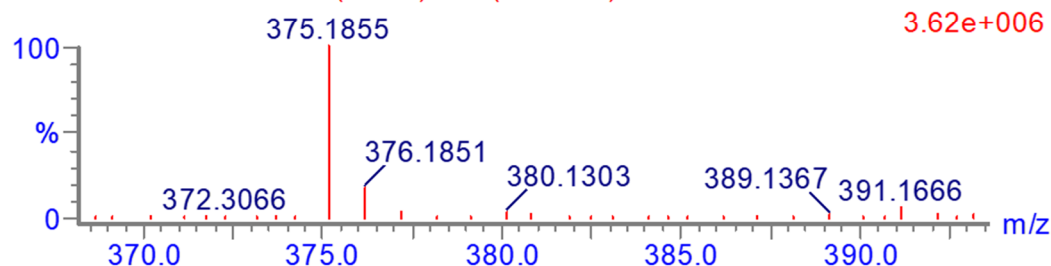

Figure S2 HR-ESIMS spectrum of compound 1

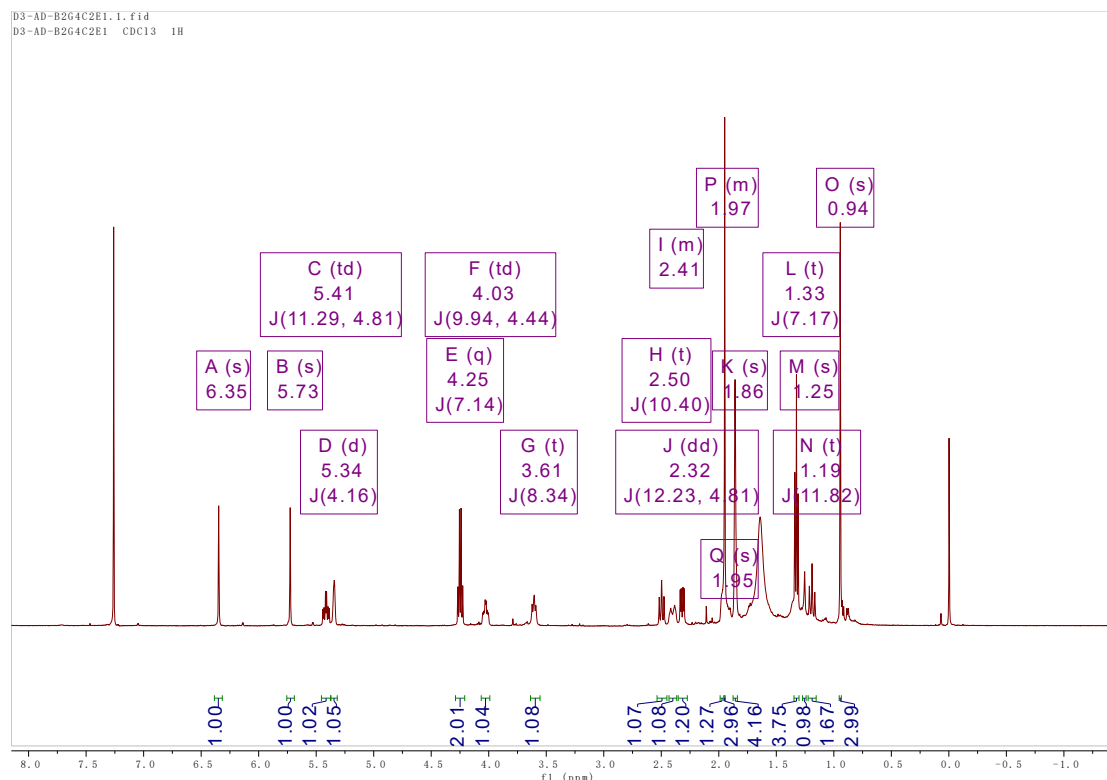

Figure S3 <sup>1</sup>H NMR spectrum of compound 1

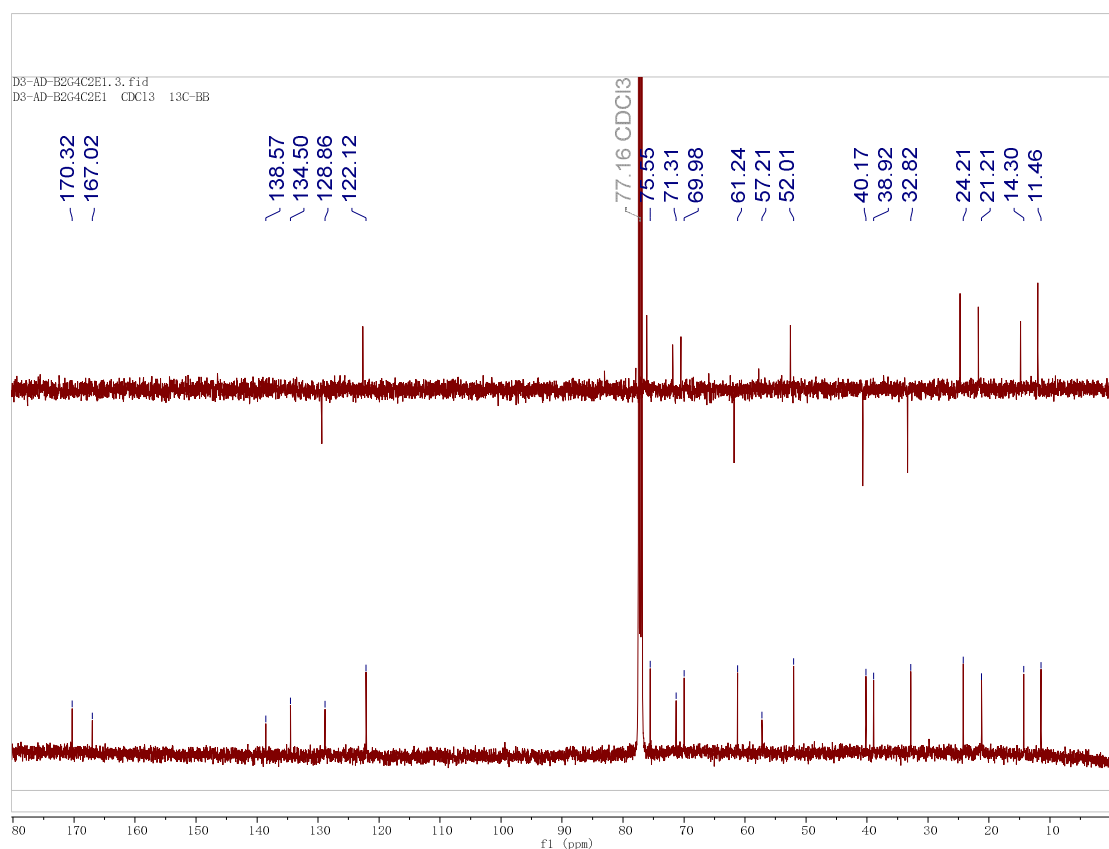

Figure S4  $^{13}\text{C}$  NMR spectrum of compound 1

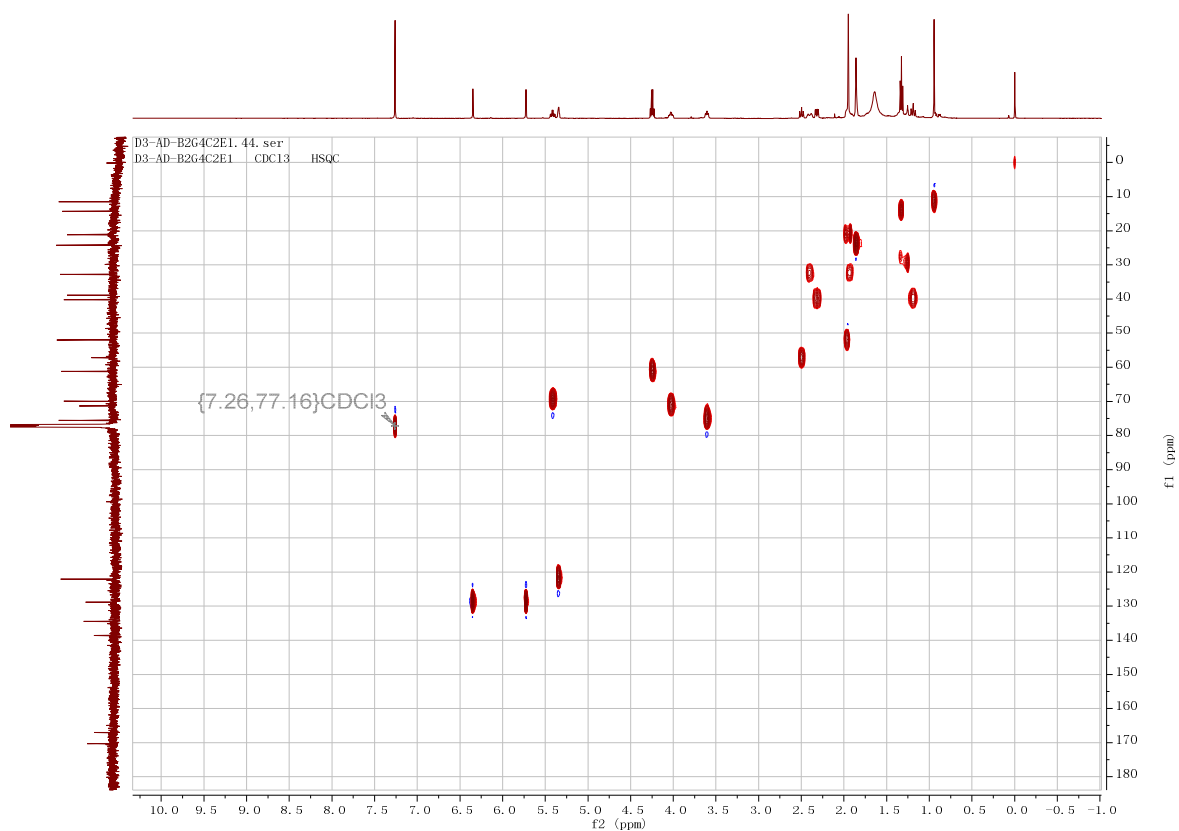

Figure S5 HSQC spectrum of compound 1

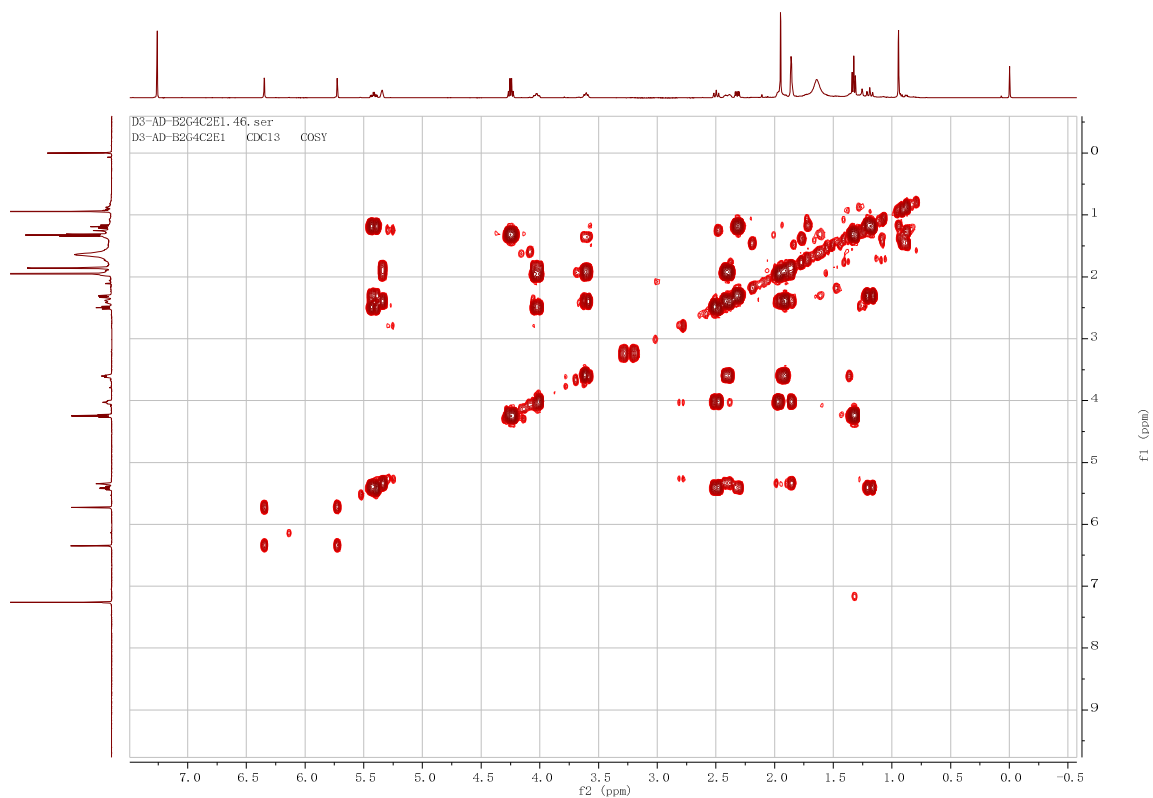

Figure S6  $^1\text{H}$ - $^1\text{H}$  COSY spectrum of compound **1**

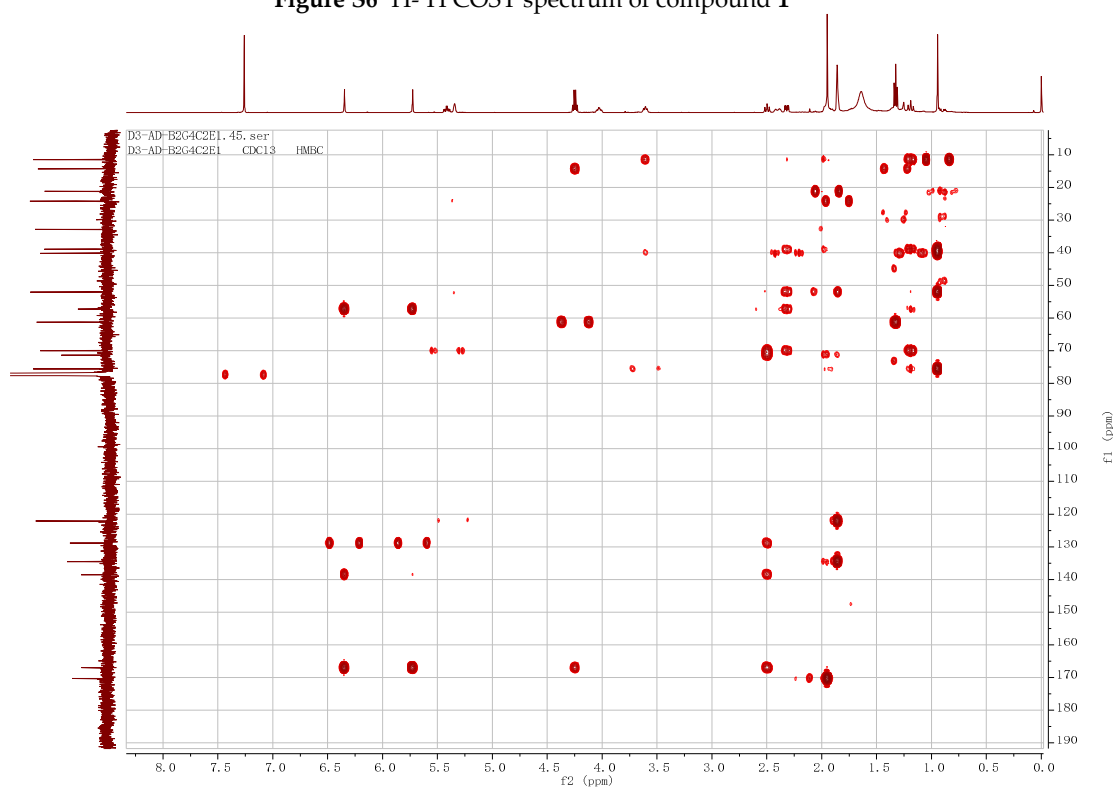

Figure S7 HMBC spectrum of compound **1**

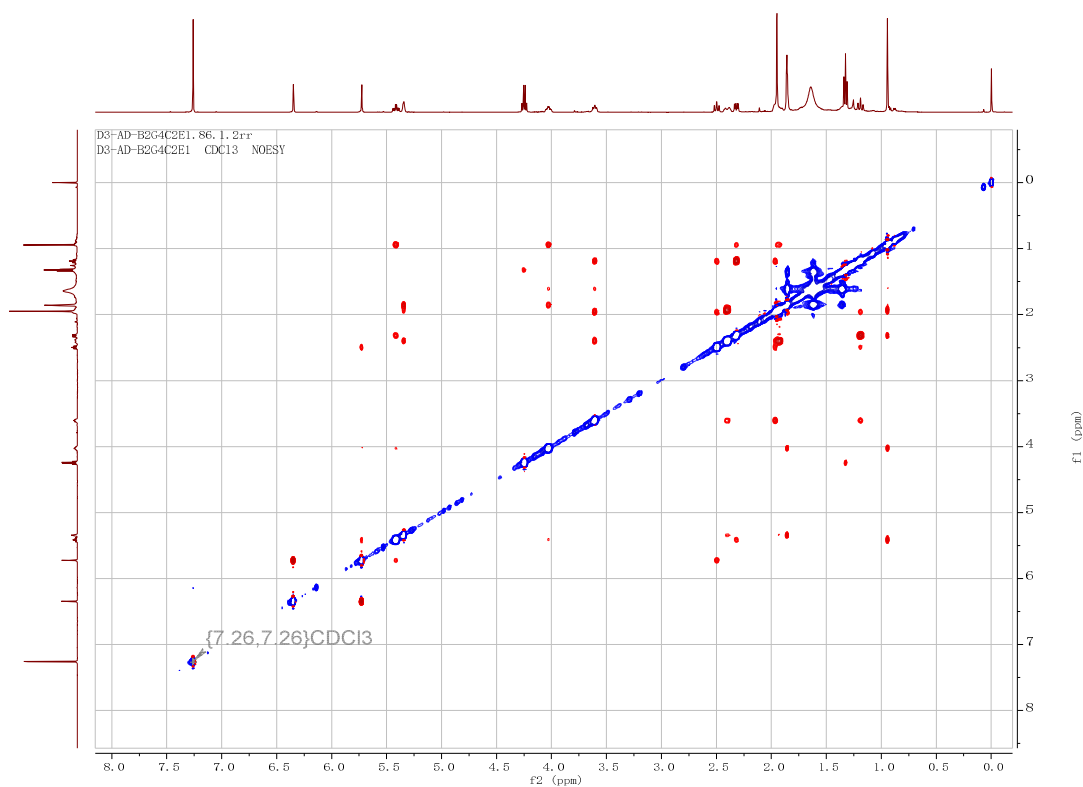

**Figure S8** NOESY spectrum of compound **1**

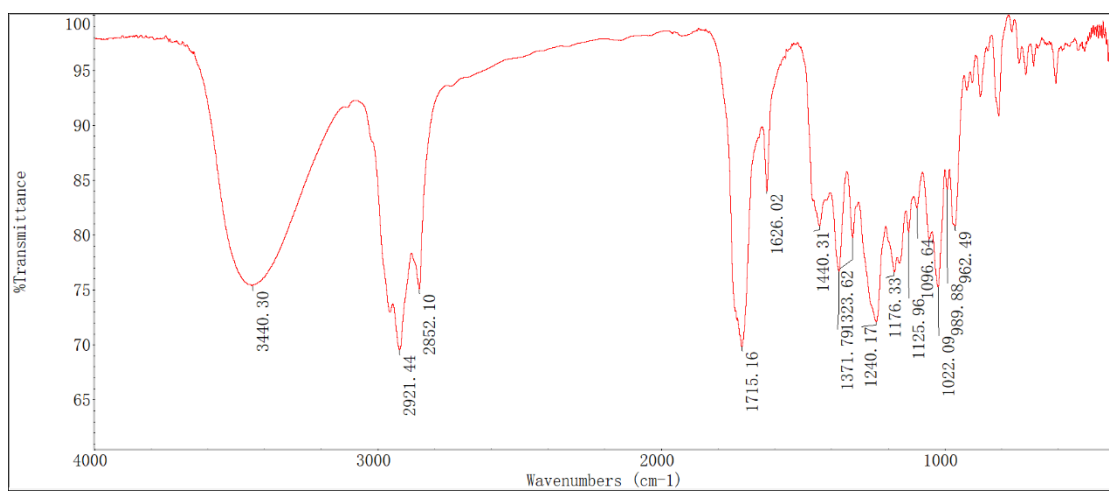

**Figure S9** IR spectrum of compound **1**

# Elemental Composition Report

Tolerance = 5.0 PPM / DBE: min = -1.5, max = 50.0

Element prediction: Off

Number of isotope peaks used for i-FIT = 3

Monoisotopic Mass, Even Electron Ions

66 formula(e) evaluated with 1 results within limits (up to 50 best isotopic matches for each mass)

Elements Used:

C: 0-200 H: 0-60 O: 0-6 Na: 0-1

Minimum: 80.00

-1.5

Maximum: 100.00

2.0

5.0

50.0

| Mass     | RA    | CalcMass | mDa  | PPM  | DBE | i-FIT | Norm | Conf(%) | Formula                                           |
|----------|-------|----------|------|------|-----|-------|------|---------|---------------------------------------------------|
| 375.1783 | 100.0 | 375.1784 | -0.1 | -0.3 | 5.5 | 794.7 | n/a  | n/a     | C <sub>19</sub> H <sub>28</sub> O <sub>6</sub> Na |

YSQ

AD-B2G4C2E2-Pos 768 (5.609)

1: TOF MS ES+  
1.27e+006

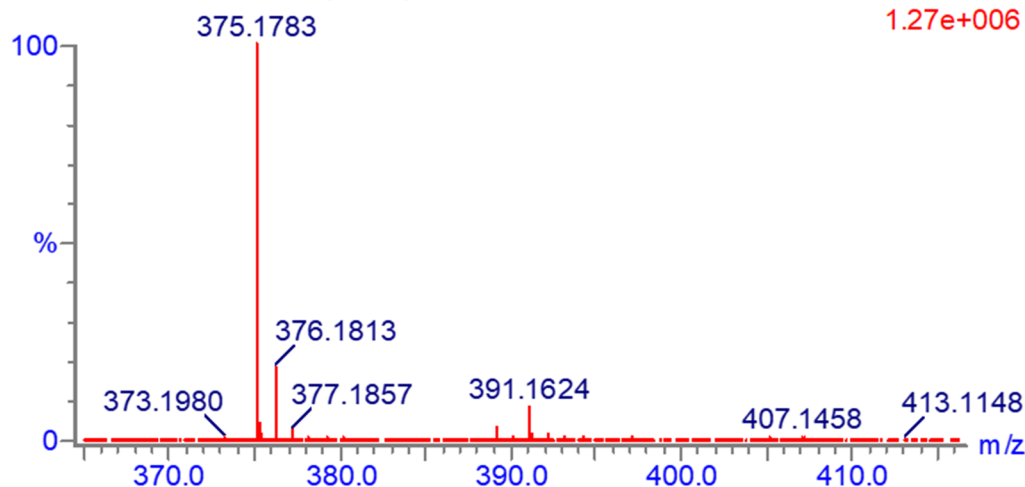

Figure S10 HR-ESIMS spectrum of compound 2

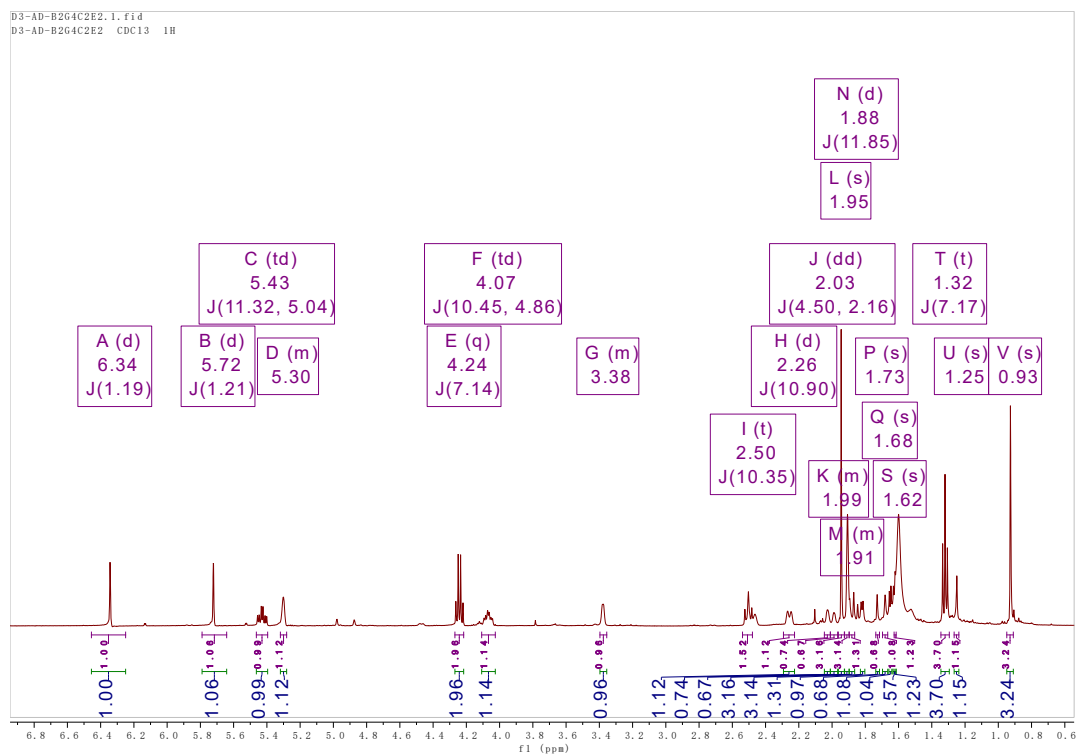

Figure S11 <sup>1</sup>H NMR spectrum of compound 2

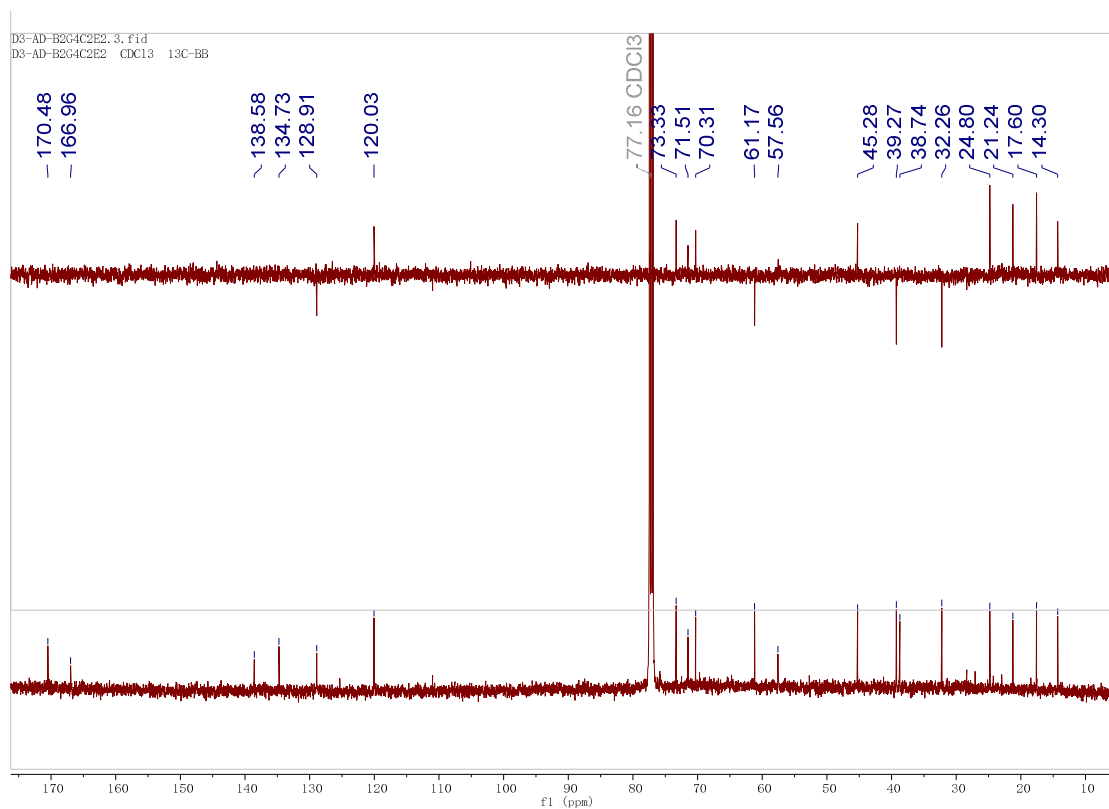

**Figure S12**  $^{13}\text{C}$  NMR spectrum of compound **2**

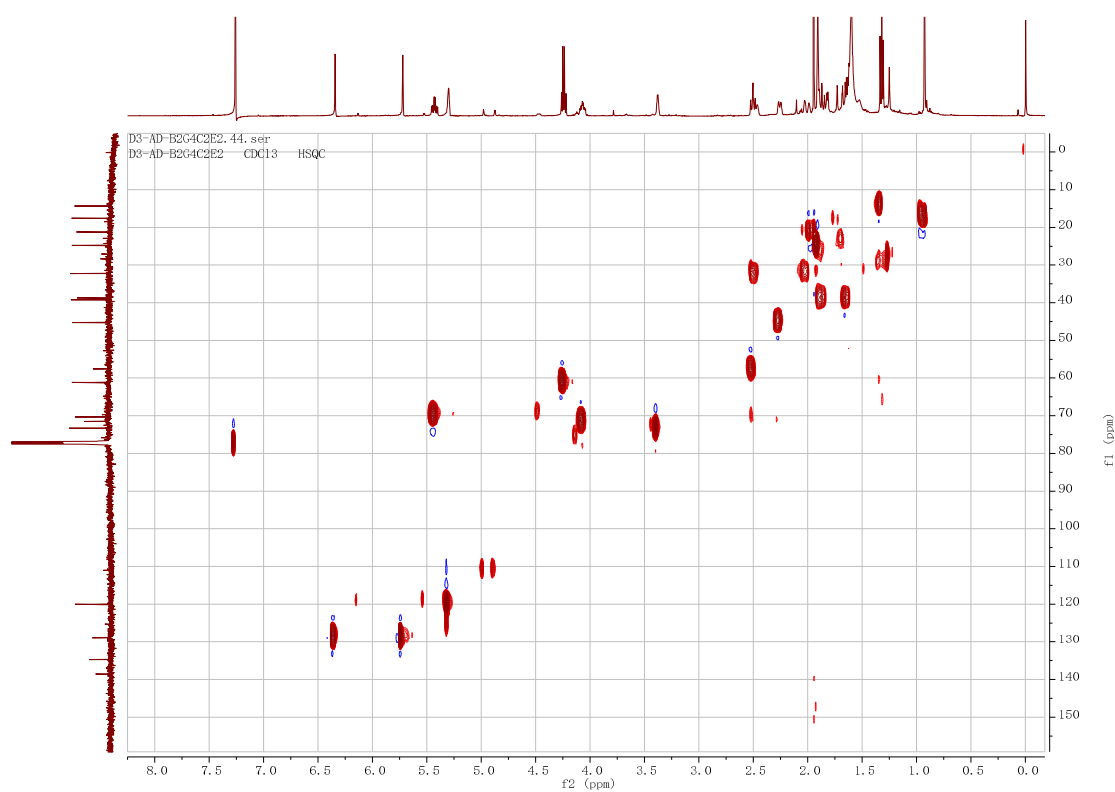

**Figure S13** HSQC spectrum of compound **2**

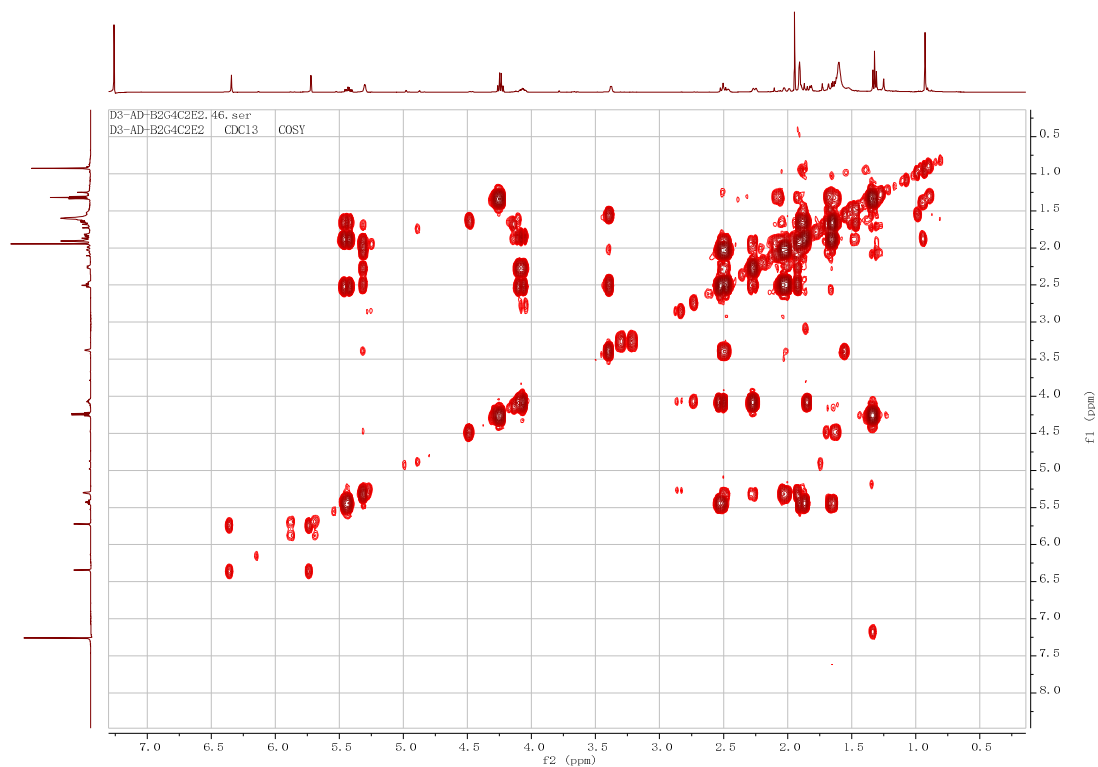

**Figure S14**  $^1\text{H}$ - $^1\text{H}$  COSY spectrum of compound 2

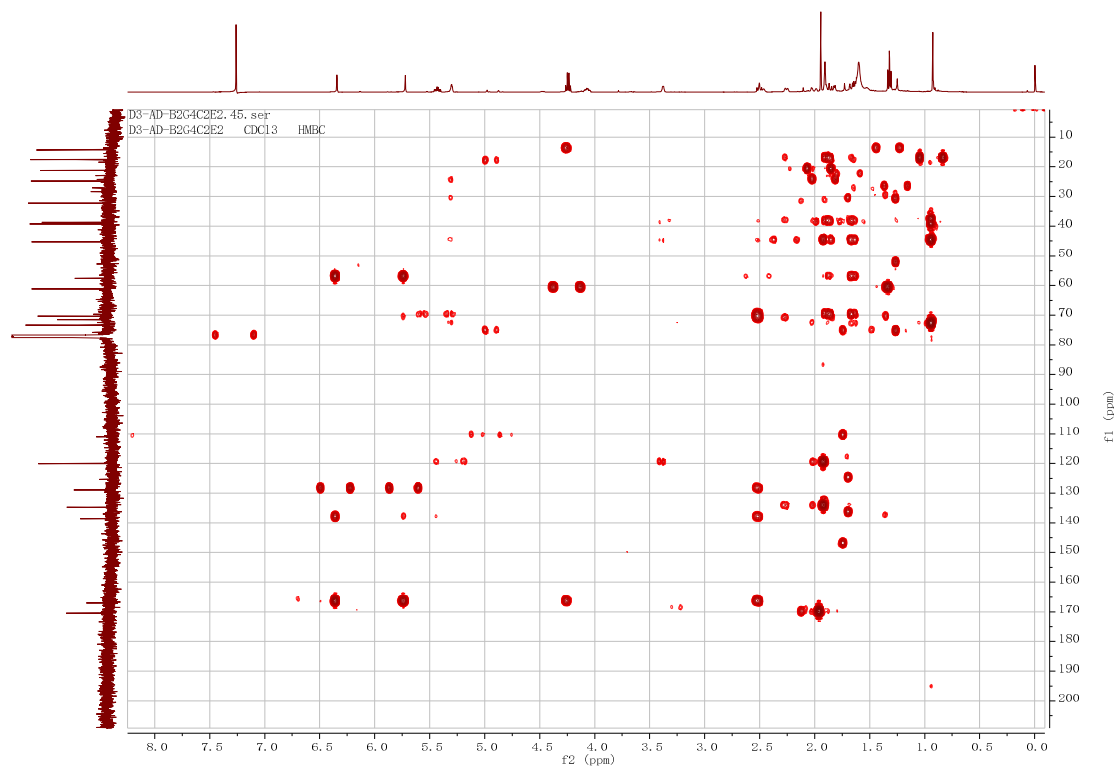

**Figure S15** HMBC spectrum of compound 2



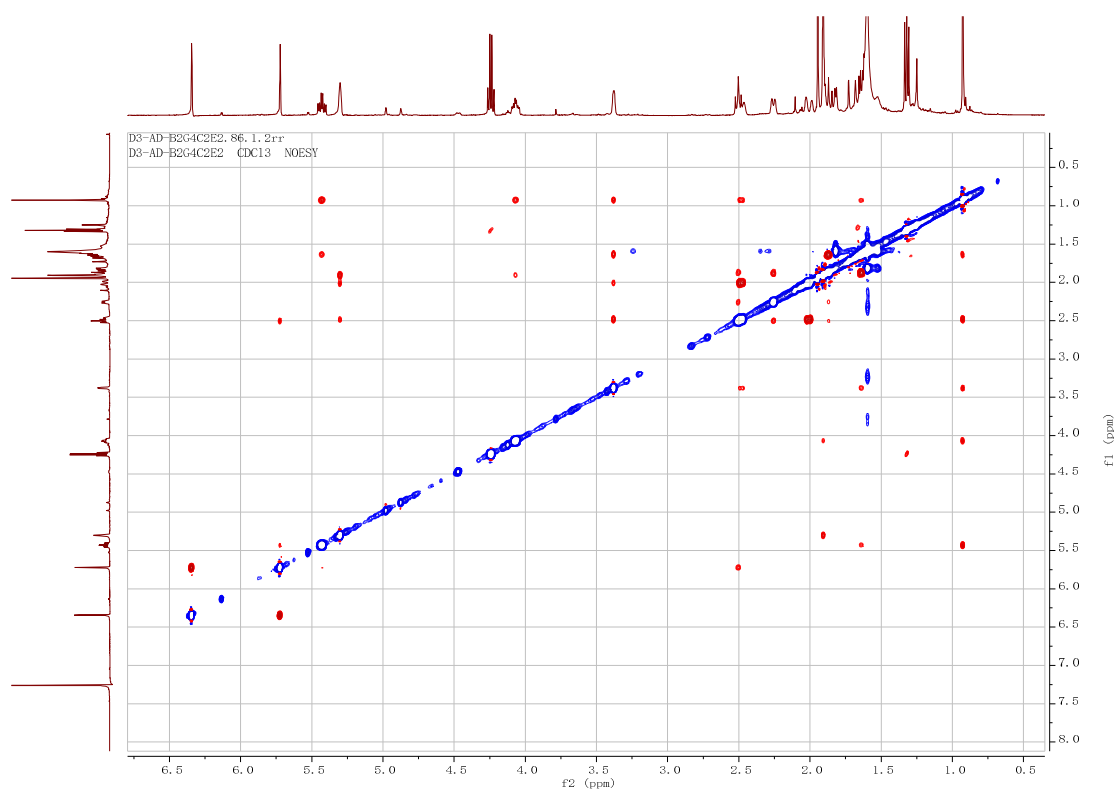

Figure S16 NOESY spectrum of compound 2

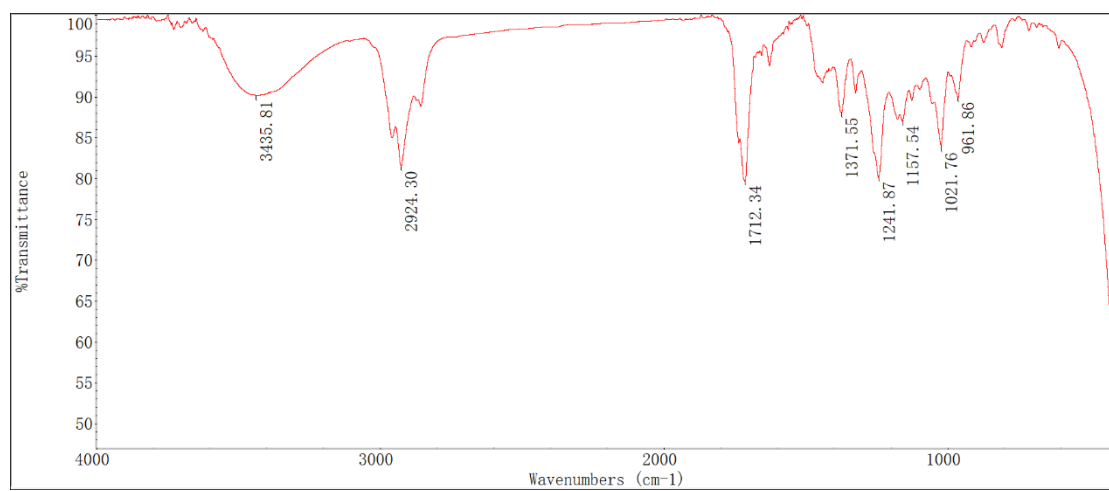

Figure S17 IR spectrum of compound 2

truncated structures used for DFT calculation

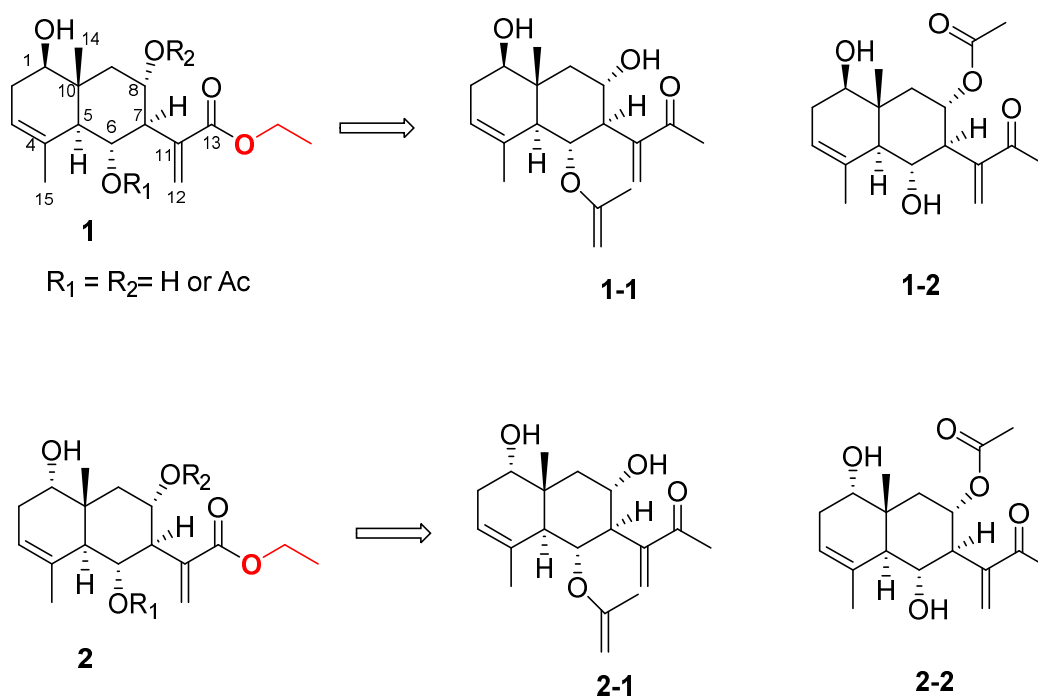

Figure S18 Possible isomers of compound 1 and 2

| Functional       | Solvent? |          | Basis Set    |          |
|------------------|----------|----------|--------------|----------|
| mPW1PW91         | PCM      |          | 6-311G(d, p) |          |
|                  | Isomer 1 | Isomer 2 | Isomer 3     | Isomer 4 |
| sDP4+ (H data)   | 0.00%    | 100.00%  | —            | —        |
| sDP4+ (C data)   | 73.05%   | 26.95%   | —            | —        |
| sDP4+ (all data) | 0.00%    | 100.00%  | —            | —        |
| uDP4+ (H data)   | 0.00%    | 100.00%  | —            | —        |
| uDP4+ (C data)   | 91.34%   | 8.66%    | —            | —        |
| uDP4+ (all data) | 0.00%    | 100.00%  | —            | —        |
| DP4+ (H data)    | 0.00%    | 100.00%  | —            | —        |
| DP4+ (C data)    | 96.62%   | 3.38%    | —            | —        |
| DP4+ (all data)  | 0.00%    | 100.00%  | —            | —        |

Figure S19 DP4+ probability statistics of compound 1

| Functional       | Solvent? |          | Basis Set    |          |
|------------------|----------|----------|--------------|----------|
| mPW1PW91         | PCM      |          | 6-311G(d, p) |          |
|                  | Isomer 1 | Isomer 2 | Isomer 3     | Isomer 4 |
| sDP4+ (H data)   | 0.00%    | 100.00%  | —            | —        |
| sDP4+ (C data)   | 73.05%   | 26.95%   | —            | —        |
| sDP4+ (all data) | 0.00%    | 100.00%  | —            | —        |
| uDP4+ (H data)   | 0.00%    | 100.00%  | —            | —        |
| uDP4+ (C data)   | 91.34%   | 8.66%    | —            | —        |
| uDP4+ (all data) | 0.00%    | 100.00%  | —            | —        |
| DP4+ (H data)    | 0.00%    | 100.00%  | —            | —        |
| DP4+ (C data)    | 96.62%   | 3.38%    | —            | —        |
| DP4+ (all data)  | 0.00%    | 100.00%  | —            | —        |

Figure S20 DP4+ probability statistics of compound 2

# Elemental Composition Report

Tolerance = 5.0 PPM / DBE: min = -1.5, max = 50.0

Element prediction: Off

Number of isotope peaks used for i-FIT = 3

Monoisotopic Mass, Even Electron Ions

66 formula(e) evaluated with 1 results within limits (up to 50 best isotopic matches for each mass)

Elements Used:

C: 0-200 H: 0-60 O: 0-6 Na: 0-1

Minimum: 80.00

Maximum: 100.00

| Mass     | RA     | Calc. Mass | mDa | PPM | DBE | i-FIT | Norm | Conf(%) | Formula                                           |
|----------|--------|------------|-----|-----|-----|-------|------|---------|---------------------------------------------------|
| 375.1784 | 100.00 | 375.1784   | 0.0 | 0.0 | 5.5 | 745.9 | n/a  | n/a     | C <sub>19</sub> H <sub>28</sub> O <sub>6</sub> Na |

YSQ

AD-B2G4B2C-Pos 691 (5.053)

1: TOF MS ES+

9.90e+005

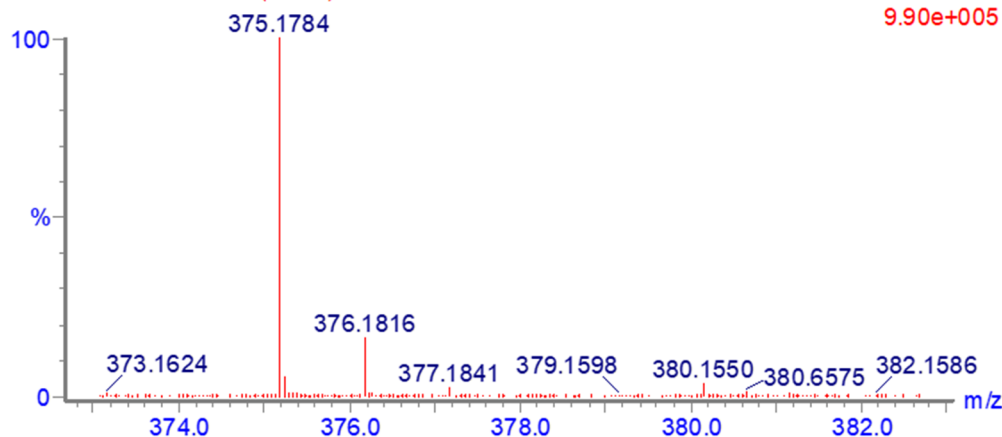

Figure S21 HR-ESIMS spectrum of compound 3

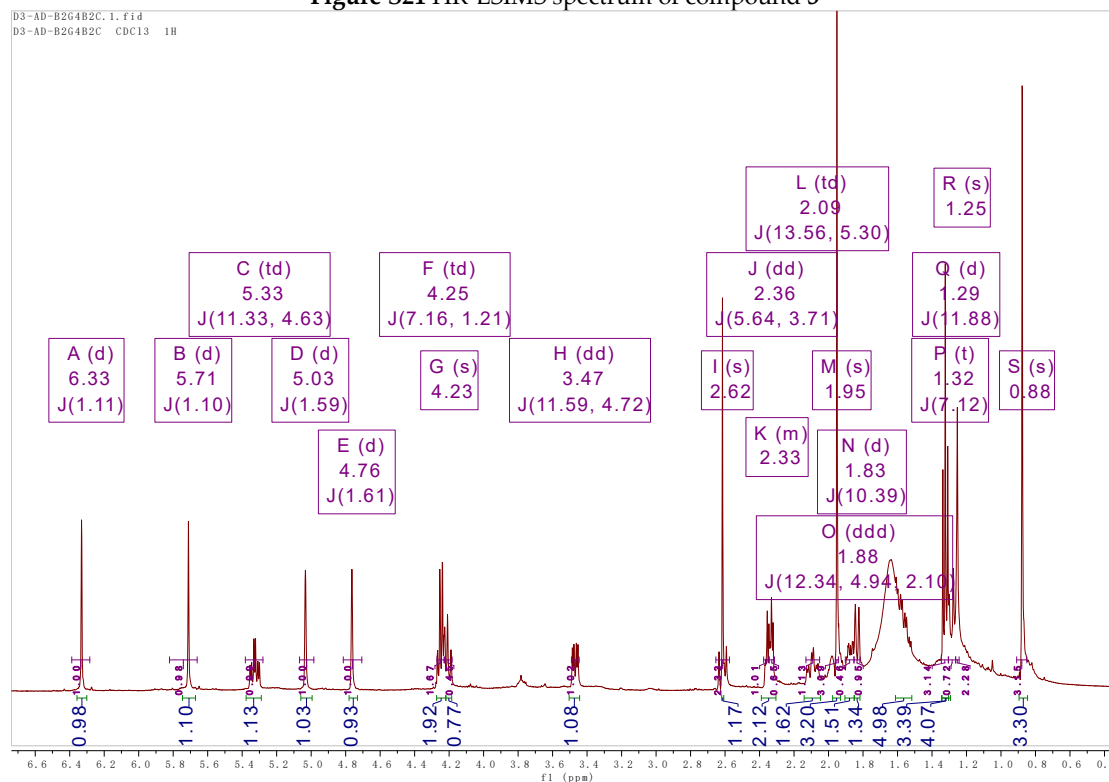

Figure S22 <sup>1</sup>H NMR spectrum of compound 3

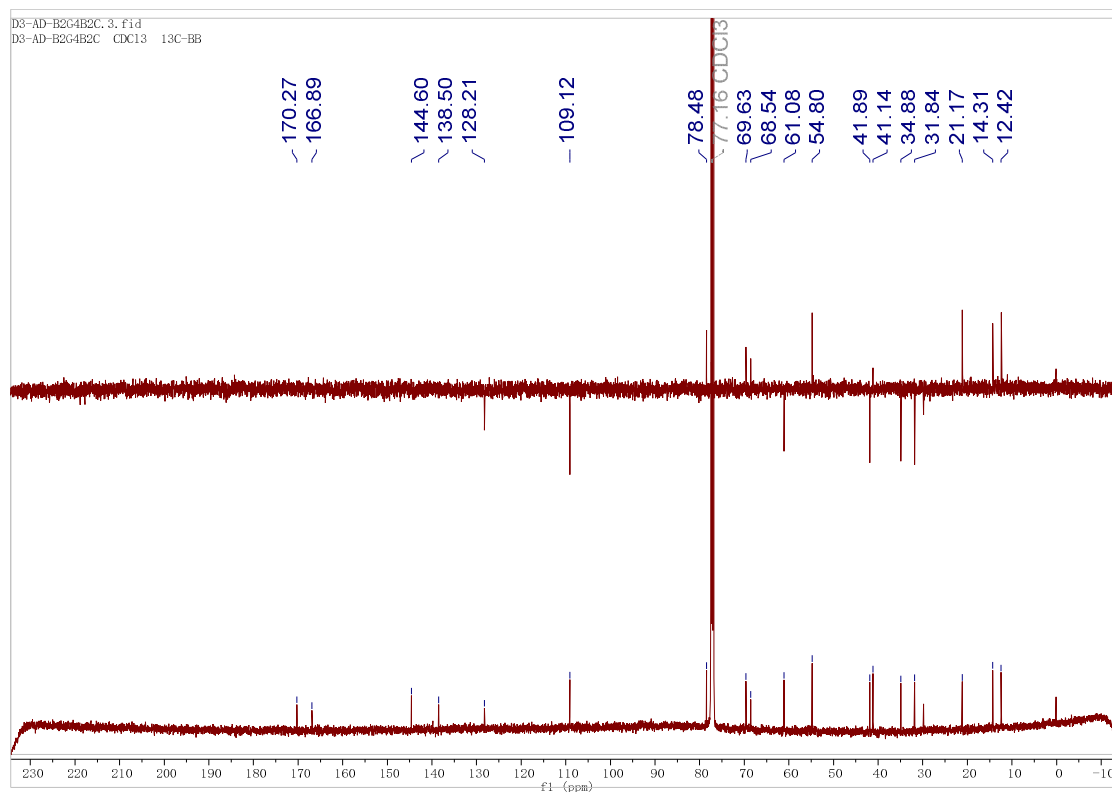

Figure S23 <sup>13</sup>C NMR spectrum of compound 3

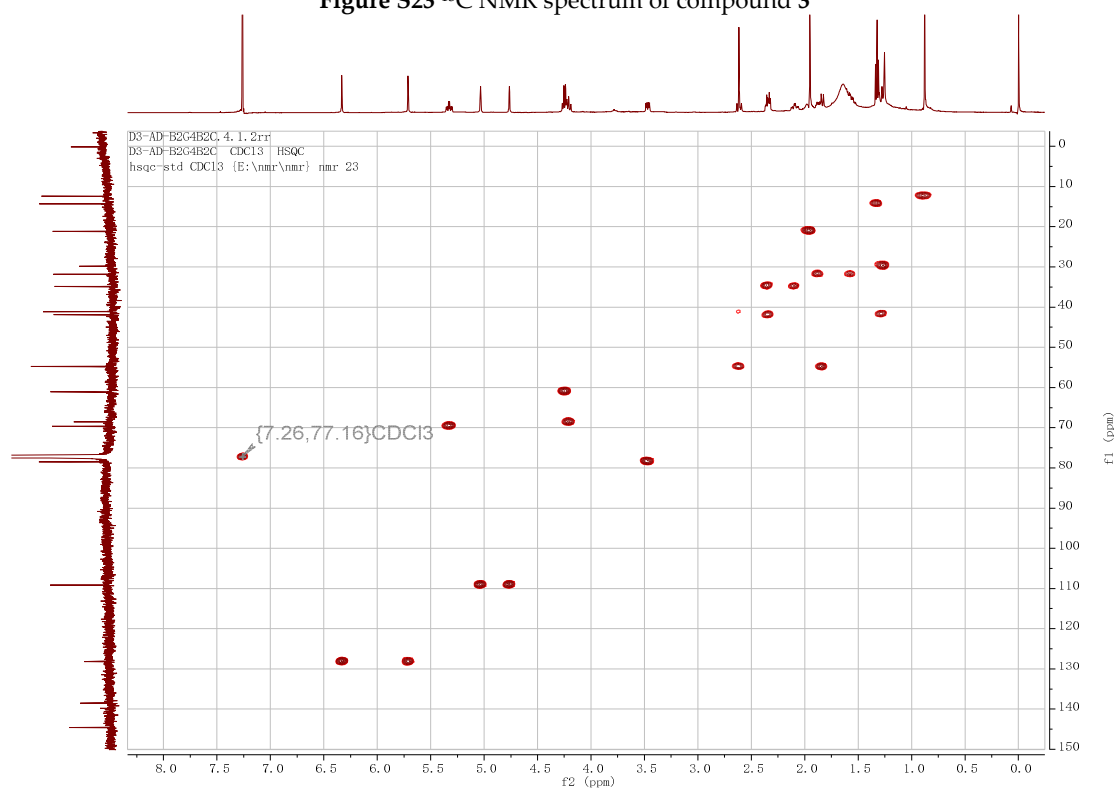

Figure S24 HSQC NMR spectrum of compound 3

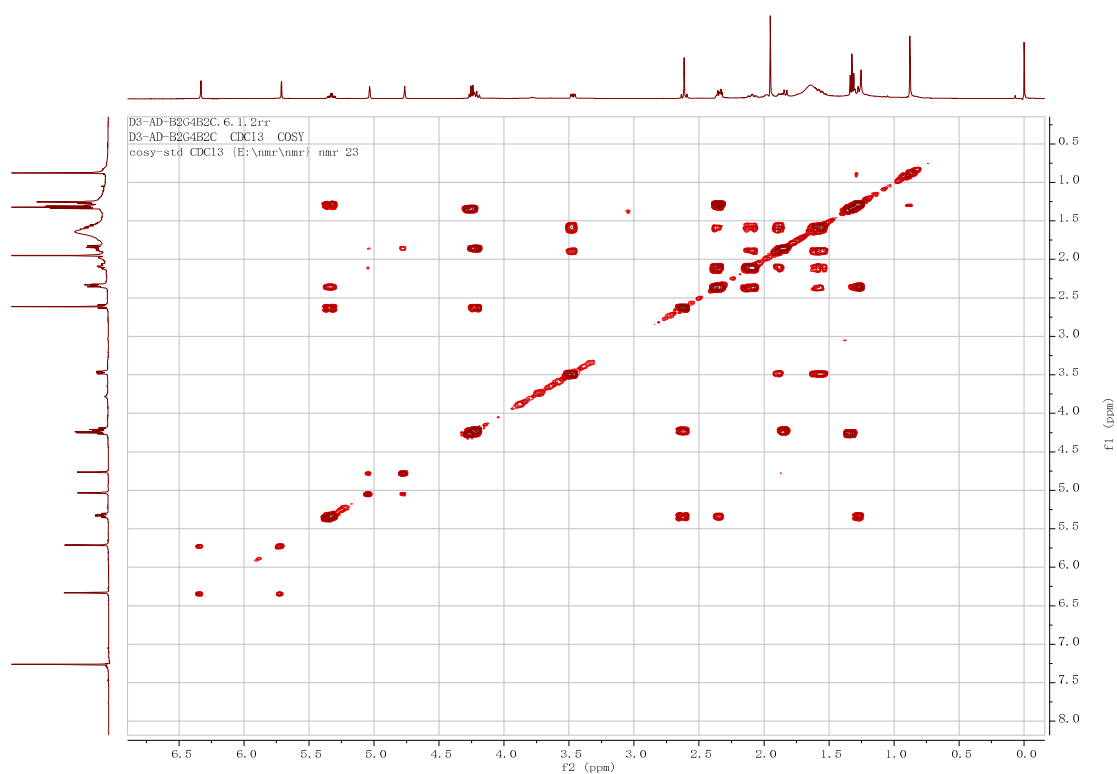

Figure S25  $^1\text{H}$ - $^1\text{H}$  COSY spectrum of compound 3

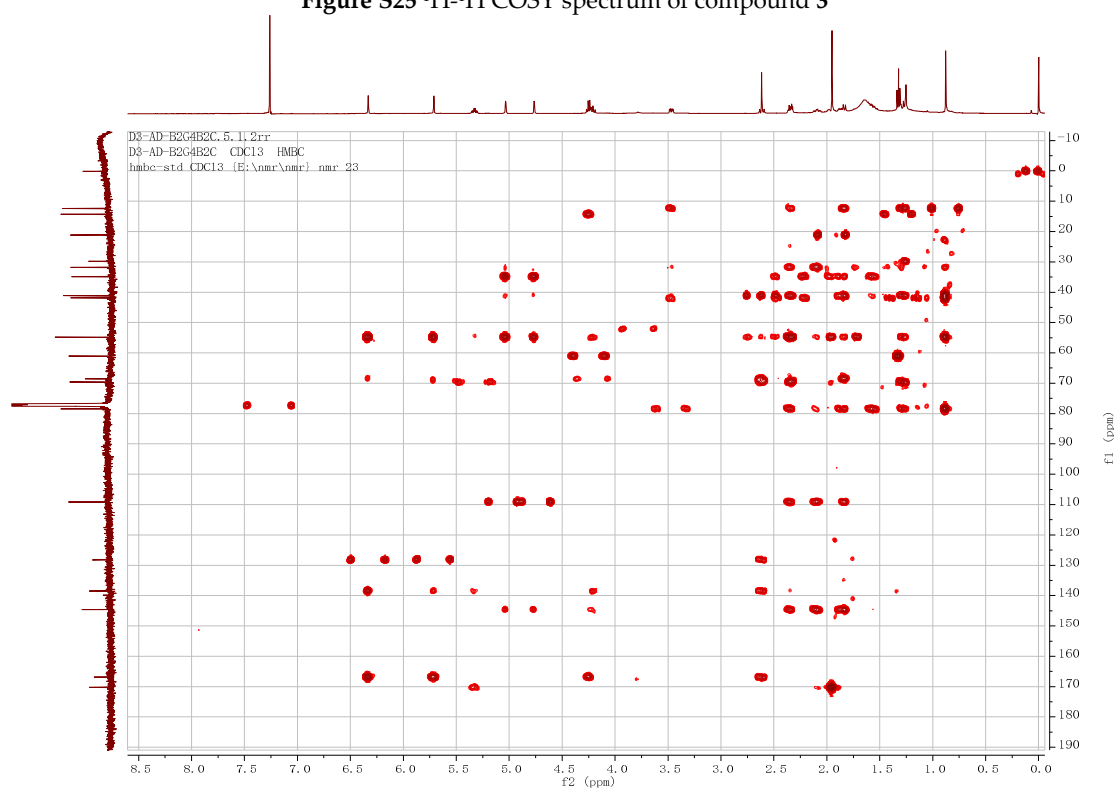

Figure S26 HMBC spectrum of compound 3

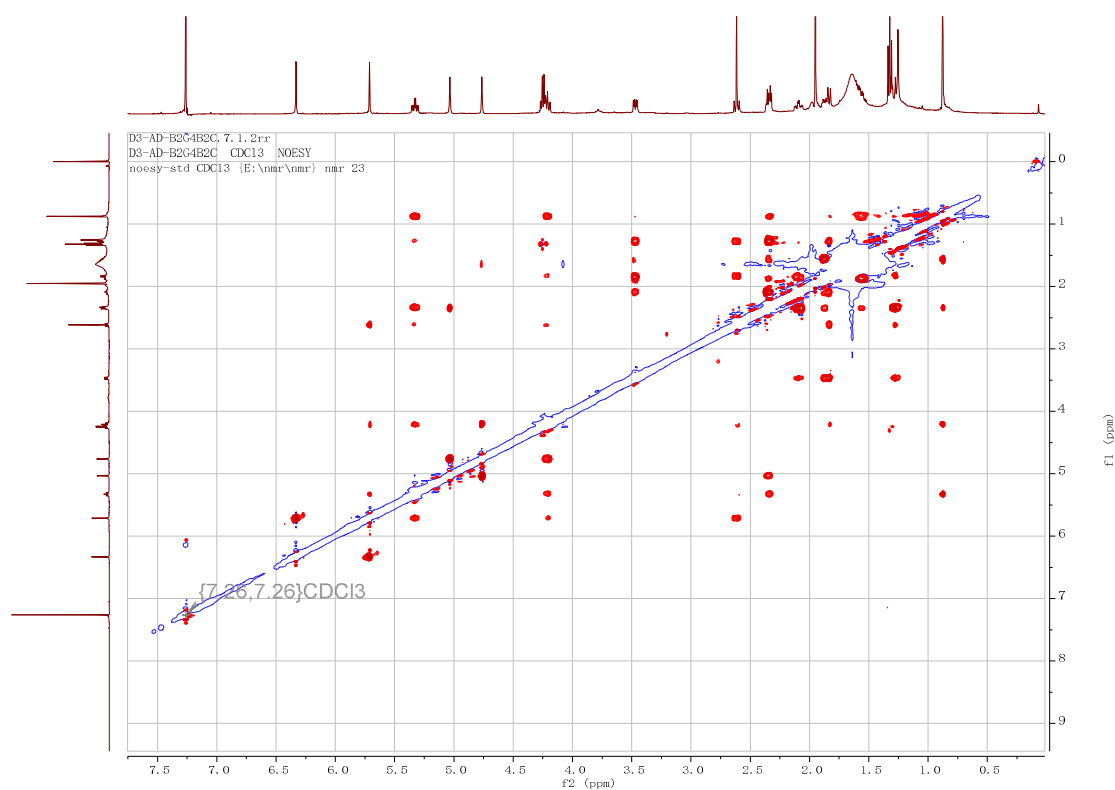

Figure S27 NOESY spectrum of compound 3

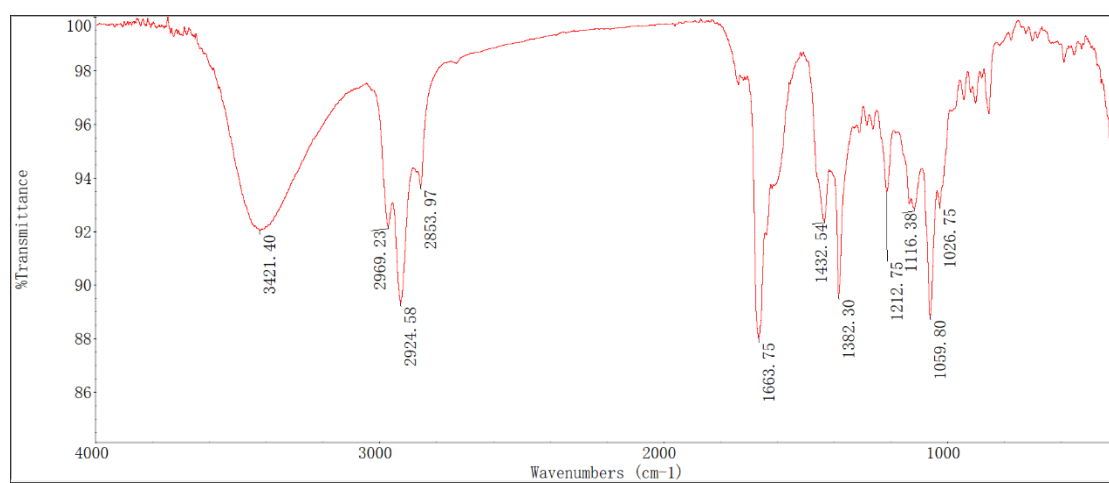

Figure S28 IR spectrum of compound 3

## Qualitative Analysis Report

|                        |                                        |                               |                             |
|------------------------|----------------------------------------|-------------------------------|-----------------------------|
| <b>Data Filename</b>   | ESI202301003.d                         | <b>Sample Name</b>            | D3-D3-AD-B2G7C2B2B          |
| <b>Sample ID</b>       |                                        | <b>Position</b>               | P1-A3                       |
| <b>Instrument Name</b> | Agilent G6520 Q-TOF                    | <b>Acq Method</b>             | 20160322_MS_ESIH_POS_1min.m |
| <b>Acquired Time</b>   | 2/17/2023 10:25:17                     | <b>IRM Calibration Status</b> | Success                     |
| <b>DA Method</b>       | small molecular data analysis method.m | <b>Comment</b>                | ESIH by fangsu              |

### User Spectra

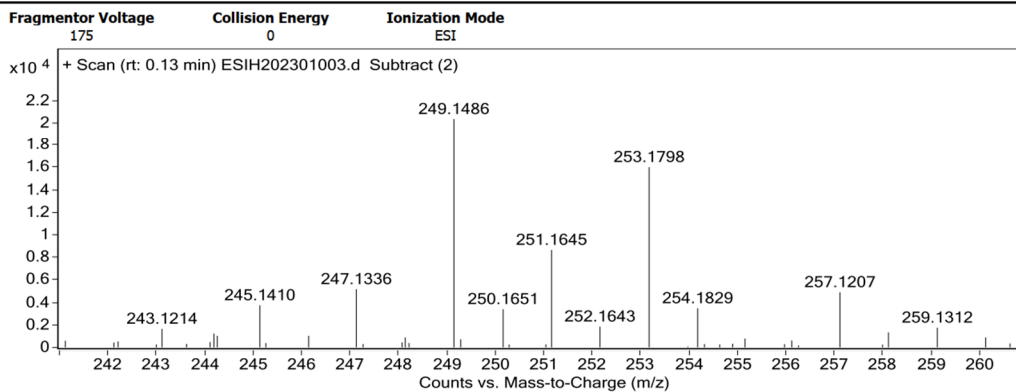

### Formula Calculator Results

| m/z      | Calc m/z | Diff (mDa) | Diff (ppm) | Ion Formula | Ion    |
|----------|----------|------------|------------|-------------|--------|
| 249.1486 | 249.1485 | -0.07      | -0.29      | C15 H21 O3  | (M+H)+ |

Figure S29 HR-ESIMS spectrum of compound 4

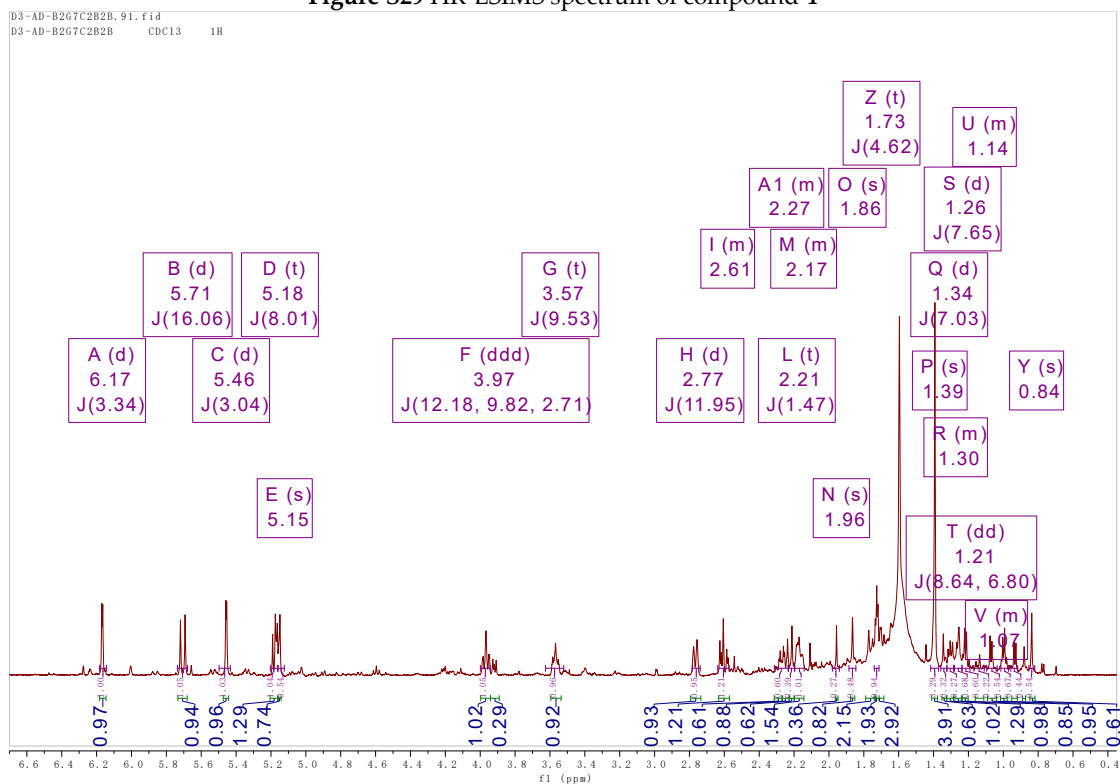

Figure S30 <sup>1</sup>H NMR spectrum of compound 4

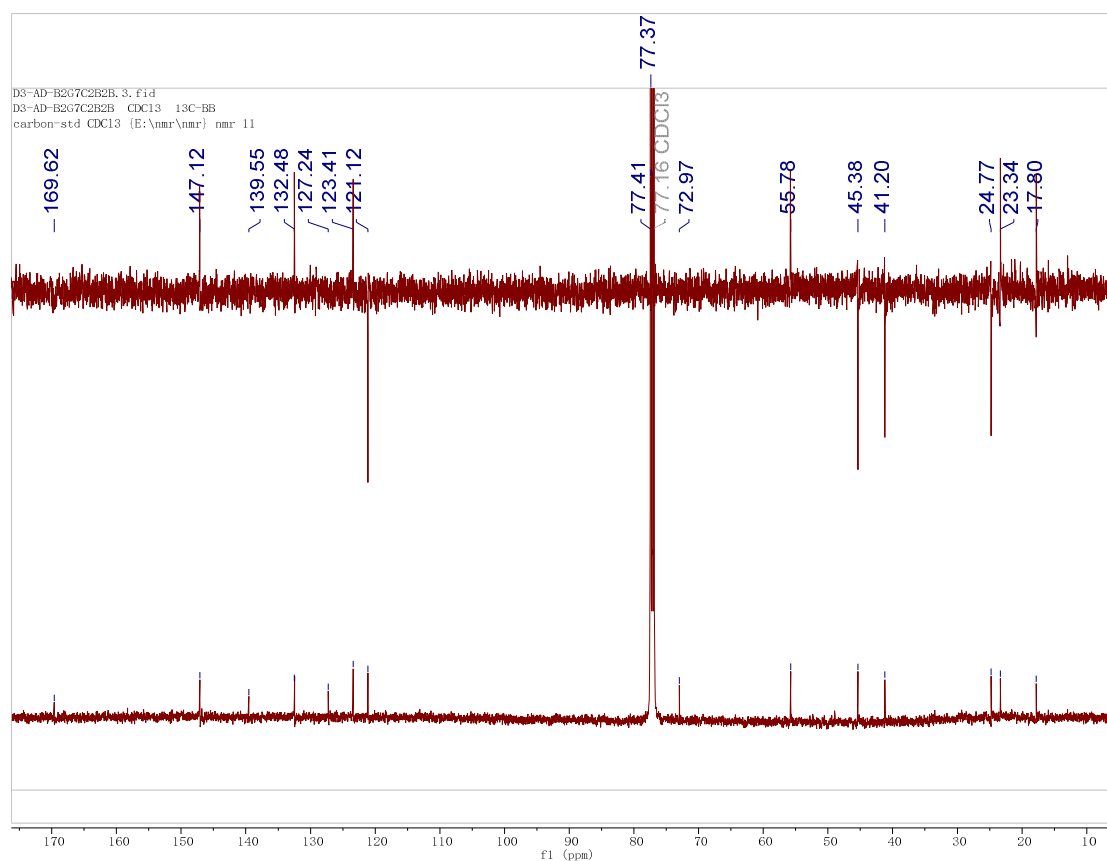

Figure S31  $^{13}\text{C}$  NMR spectrum of compound 4

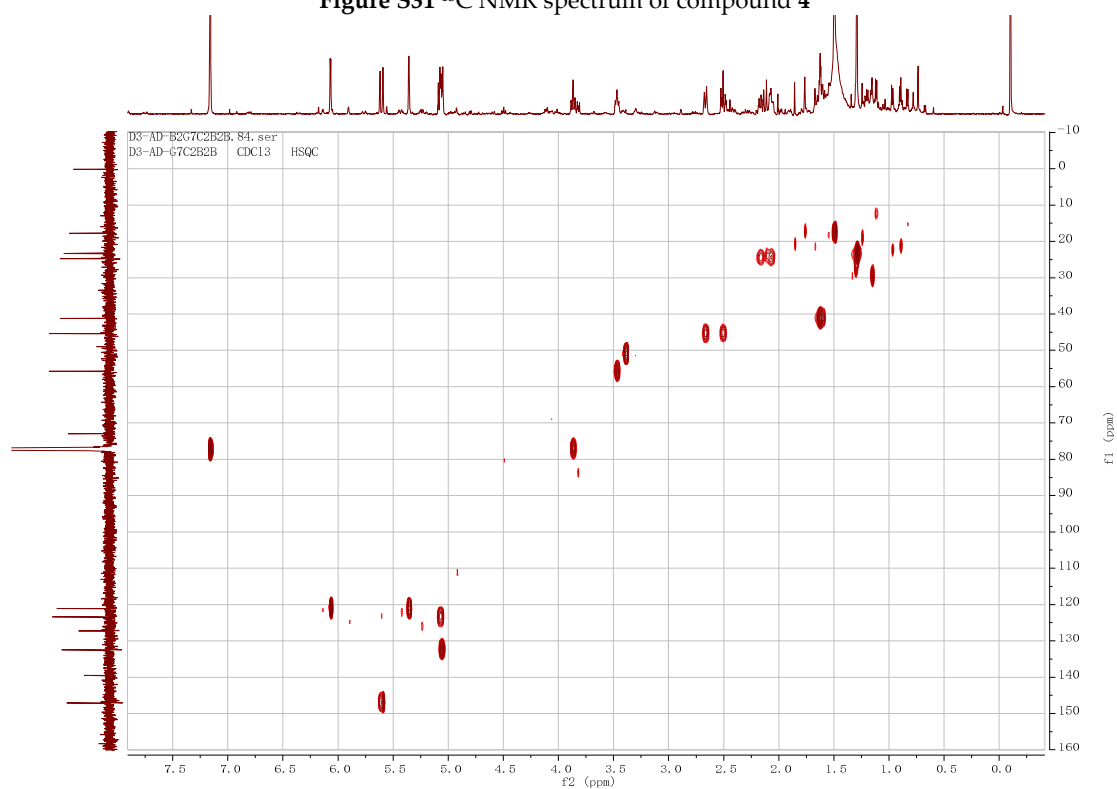

Figure S32 HSQC spectrum of compound 4



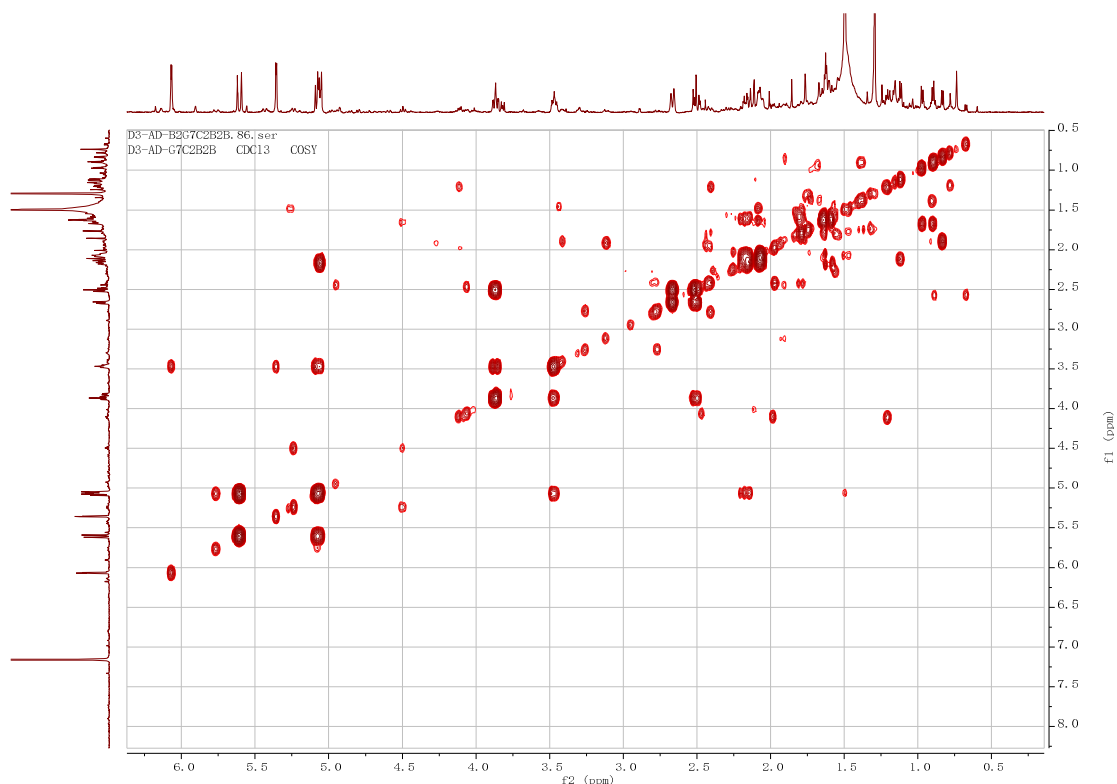

Figure S33  $^1\text{H}$ - $^1\text{H}$  COSY spectrum of compound 4

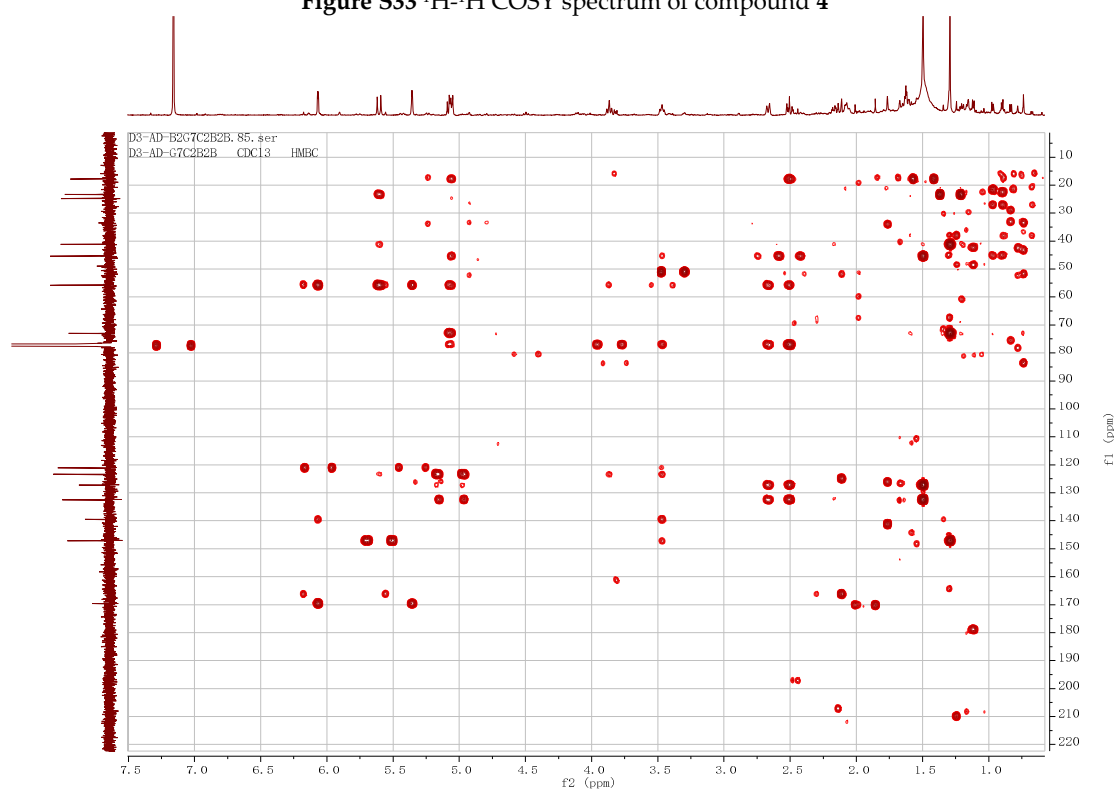

Figure S34 HMBC spectrum of compound 4

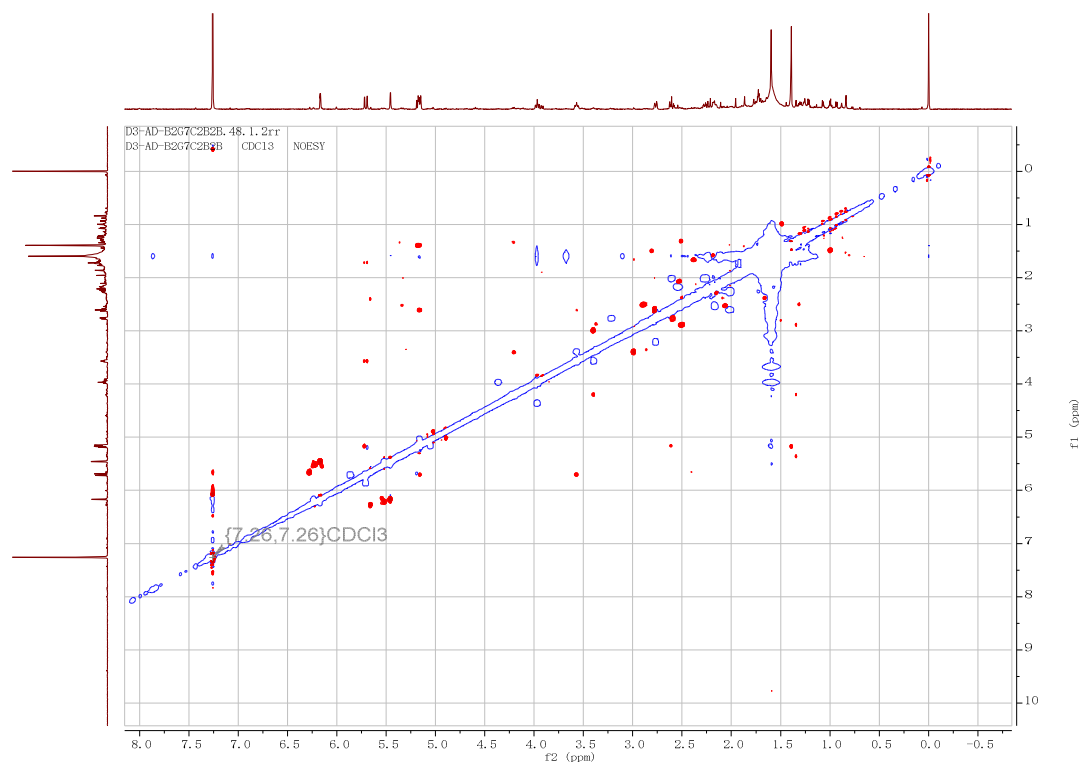

**Figure S35** NOESY spectrum of compound **4**

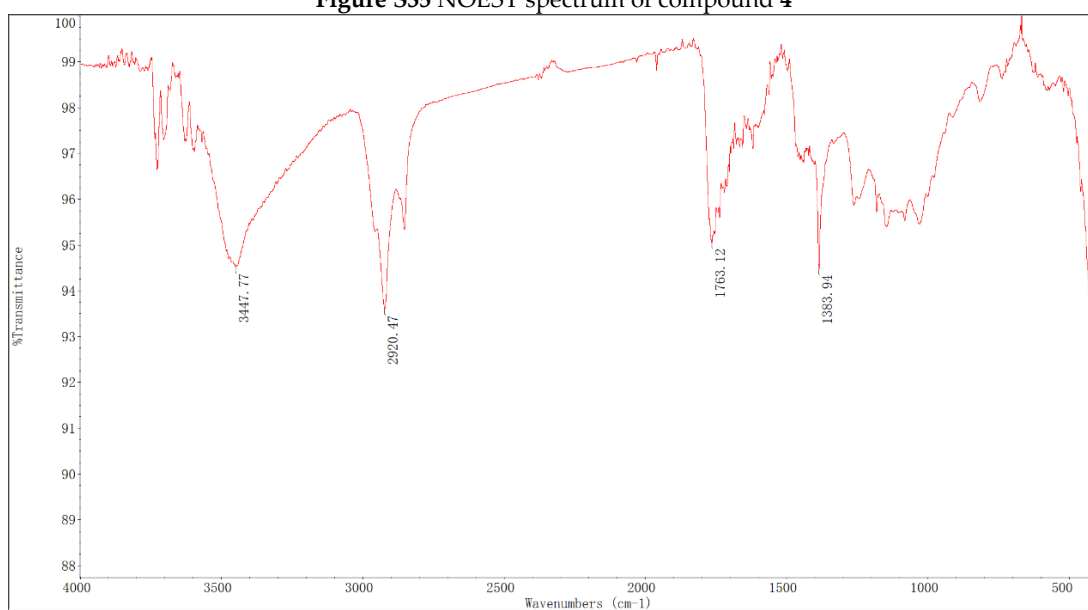

**Figure S36** IR spectrum of compound **4**

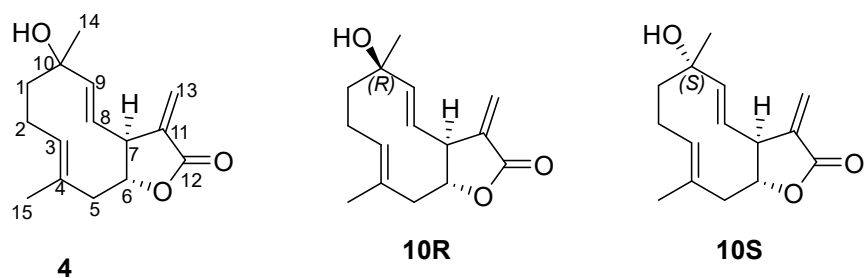

**Figure S37** Possible isomers of compound **4**

| Functional       | Solvent? |          | Basis Set    |          |
|------------------|----------|----------|--------------|----------|
| mPW1PW91         | PCM      |          | 6-311G(d, p) |          |
|                  | Isomer 1 | Isomer 2 | Isomer 3     | Isomer 4 |
| sDP4+ (H data)   | 1.67%    | 98.33%   | —            | —        |
| sDP4+ (C data)   | 0.02%    | 99.98%   | —            | —        |
| sDP4+ (all data) | 0.00%    | 100.00%  | —            | —        |
| uDP4+ (H data)   | 9.94%    | 90.06%   | —            | —        |
| uDP4+ (C data)   | 0.08%    | 99.92%   | —            | —        |
| uDP4+ (all data) | 0.01%    | 99.99%   | —            | —        |
| DP4+ (H data)    | 0.19%    | 99.81%   | —            | —        |
| DP4+ (C data)    | 0.00%    | 100.00%  | —            | —        |
| DP4+ (all data)  | 0.00%    | 100.00%  | —            | —        |

**Figure S38** DP4+ probability statistics of compound **4**

## Qualitative Analysis Report

|                        |                                        |                               |                             |
|------------------------|----------------------------------------|-------------------------------|-----------------------------|
| <b>Data Filename</b>   | ESIH202301002.d                        | <b>Sample Name</b>            | D3-D3-AD-B2G6C2A1           |
| <b>Sample ID</b>       |                                        | <b>Position</b>               | P1-A2                       |
| <b>Instrument Name</b> | Agilent G6520 Q-TOF                    | <b>Acq Method</b>             | 20160322_MS_ESIH_POS_1min.m |
| <b>Acquired Time</b>   | 2/17/2023 10:24:00                     | <b>IRM Calibration Status</b> | Success                     |
| <b>DA Method</b>       | small molecular data analysis method.m | <b>Comment</b>                | ESIH by fangsuo             |

### User Spectra

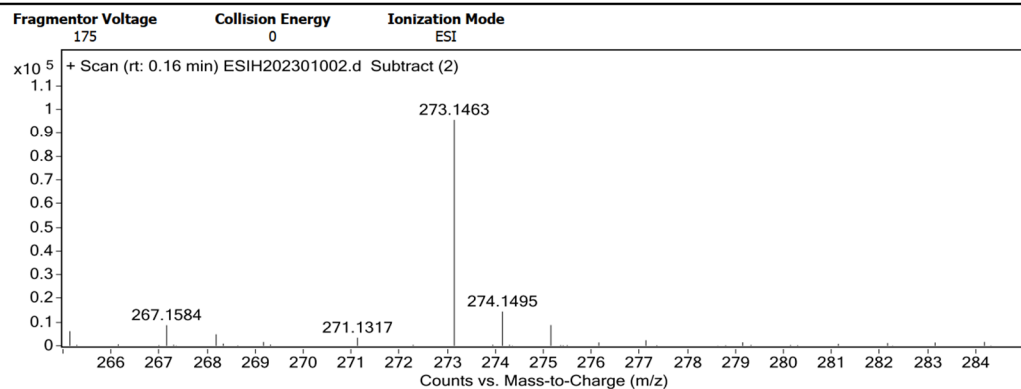

### Formula Calculator Results

| m/z      | Calc m/z | Diff (mDa) | Diff (ppm) | Ion Formula   | Ion     |
|----------|----------|------------|------------|---------------|---------|
| 273.1463 | 273.1461 | -0.17      | -0.62      | C15 H22 Na O3 | (M+Na)+ |

Figure S39 HR-ESIMS spectrum of compound 5

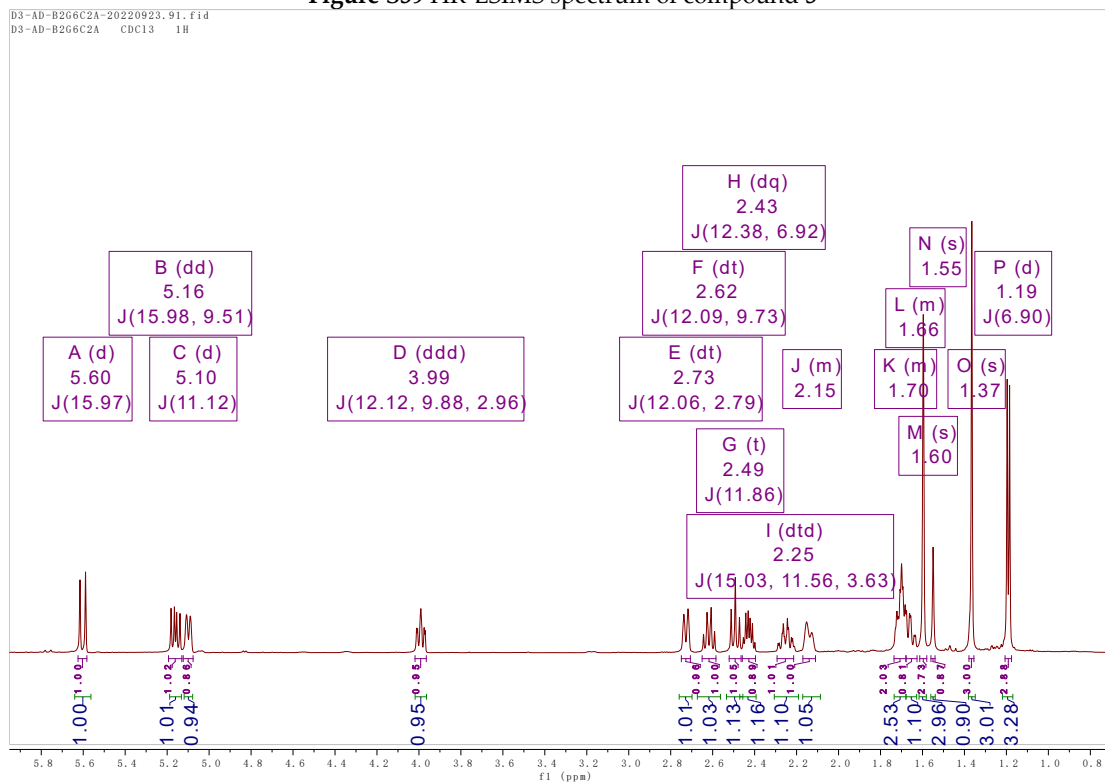

Figure S40 <sup>1</sup>H NMR spectrum of compound 5

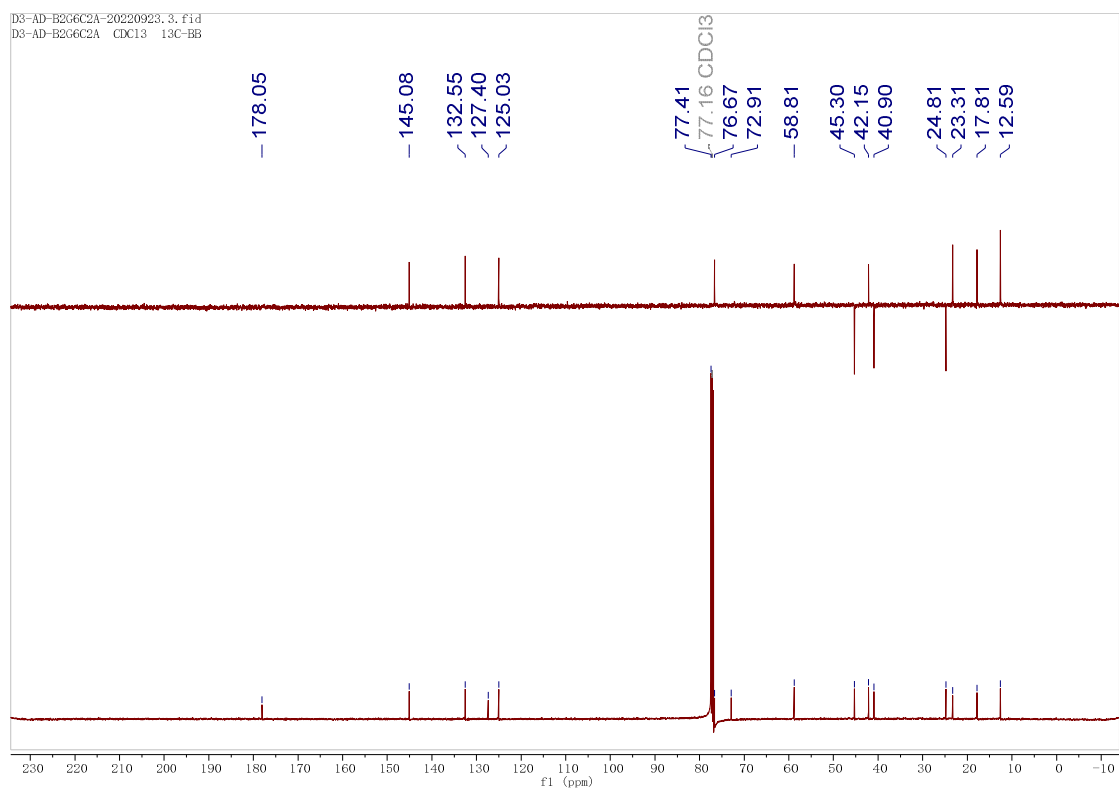

**Figure S41** <sup>13</sup>C NMR spectrum of compound **5**

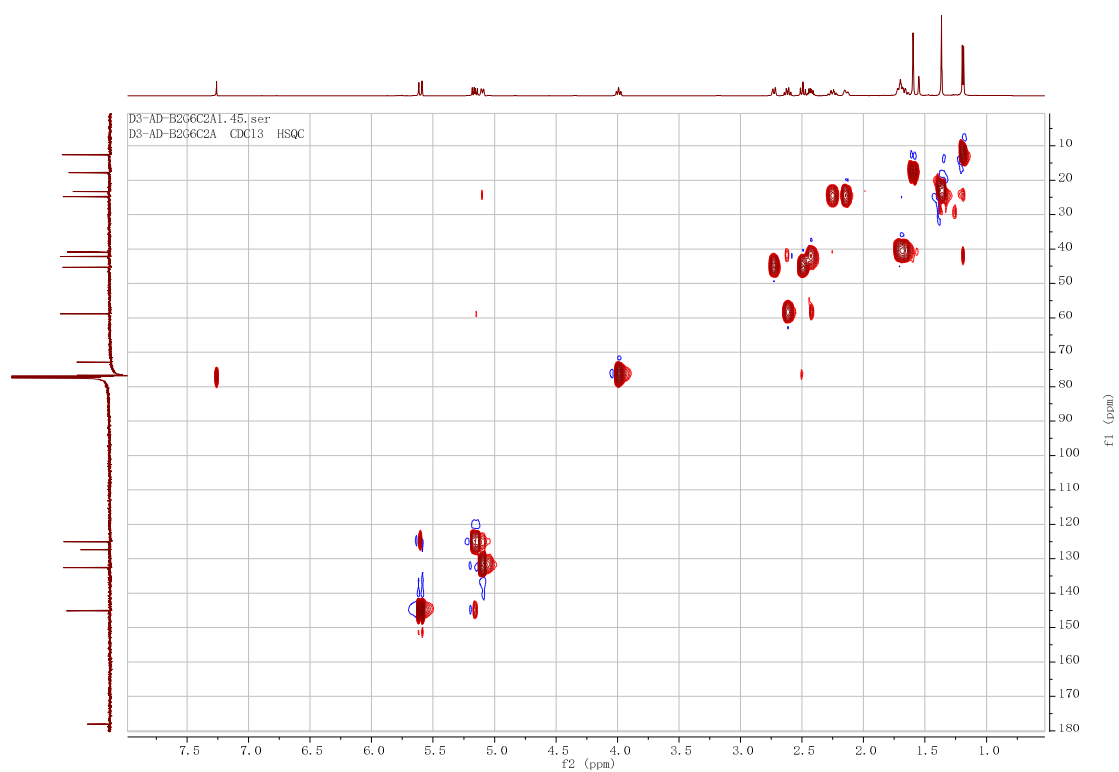

**Figure S42** HSQC spectrum of compound **5**

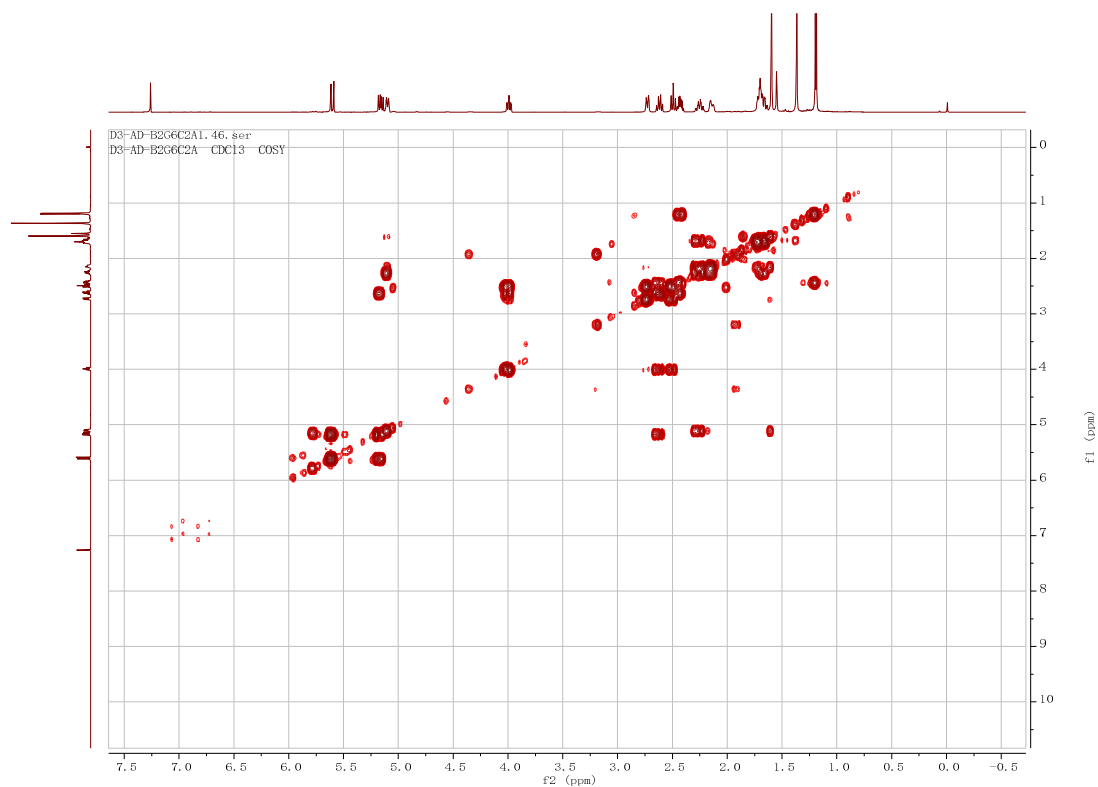

Figure S43  $^1\text{H}$ - $^1\text{H}$  COSY spectrum of compound 5

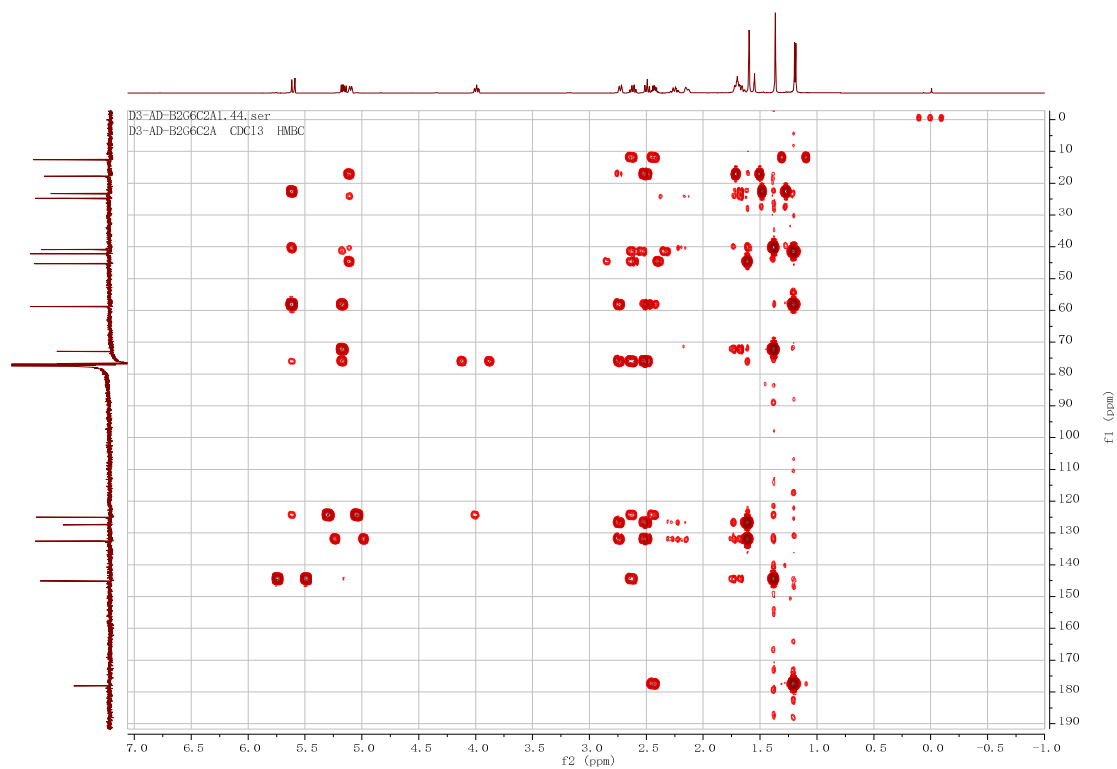

Figure S44 HMBC spectrum of compound 5

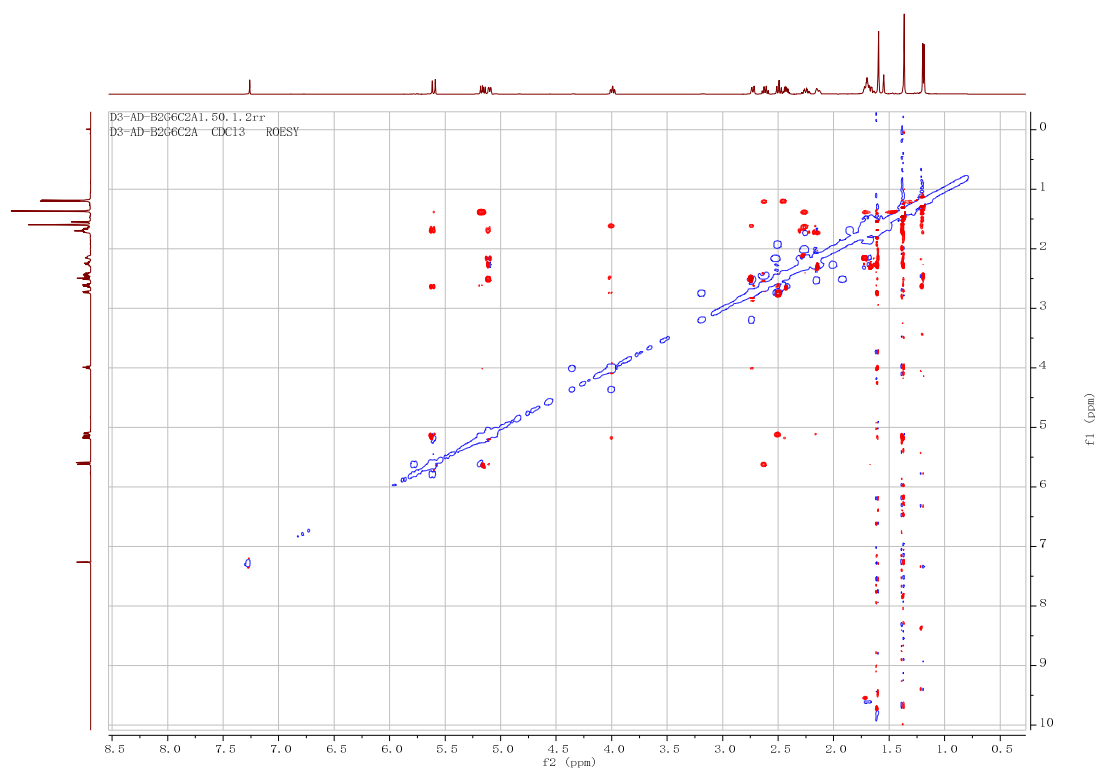

Figure S45 NOESY spectrum of compound **5**

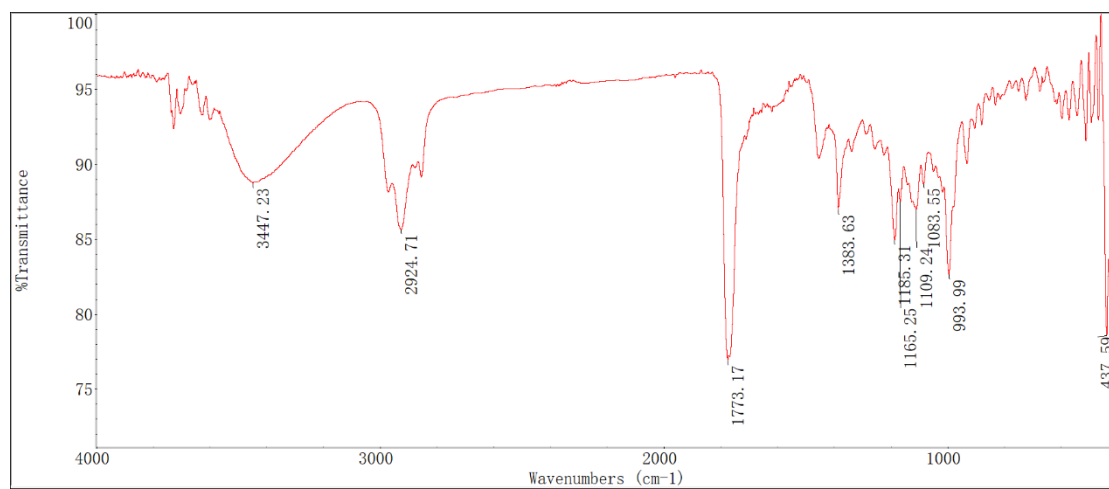

Figure S46 IR spectrum of compound **5**

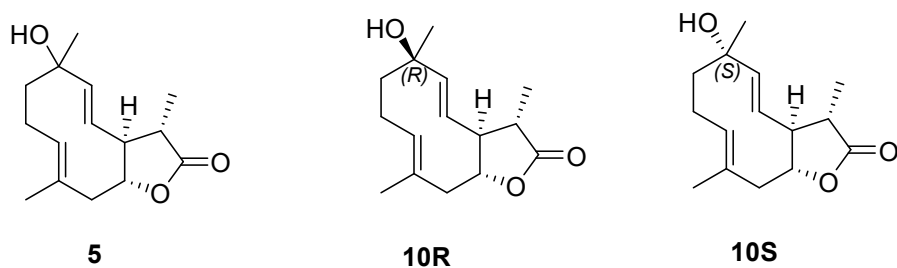

**Figure S47** Possible isomers of compound 5

| Functional       | Solvent? |          | Basis Set    |      |
|------------------|----------|----------|--------------|------|
| mPW1PW91         | PCM      |          | 6-311G(d, p) |      |
|                  | Isomer 1 | Isomer 2 | Isomer 3     | Isom |
| sDP4+ (H data)   | 0.85%    | 99.15%   | —            | —    |
| sDP4+ (C data)   | 3.75%    | 96.25%   | —            | —    |
| sDP4+ (all data) | 0.03%    | 99.97%   | —            | —    |
| uDP4+ (H data)   | 0.20%    | 99.80%   | —            | —    |
| uDP4+ (C data)   | 18.59%   | 81.41%   | —            | —    |
| uDP4+ (all data) | 0.05%    | 99.95%   | —            | —    |
| DP4+ (H data)    | 0.00%    | 100.00%  | —            | —    |
| DP4+ (C data)    | 0.88%    | 99.12%   | —            | —    |
| DP4+ (all data)  | 0.00%    | 100.00%  | —            | —    |

**Figure S48** DP4+ probability statistics of compound 5





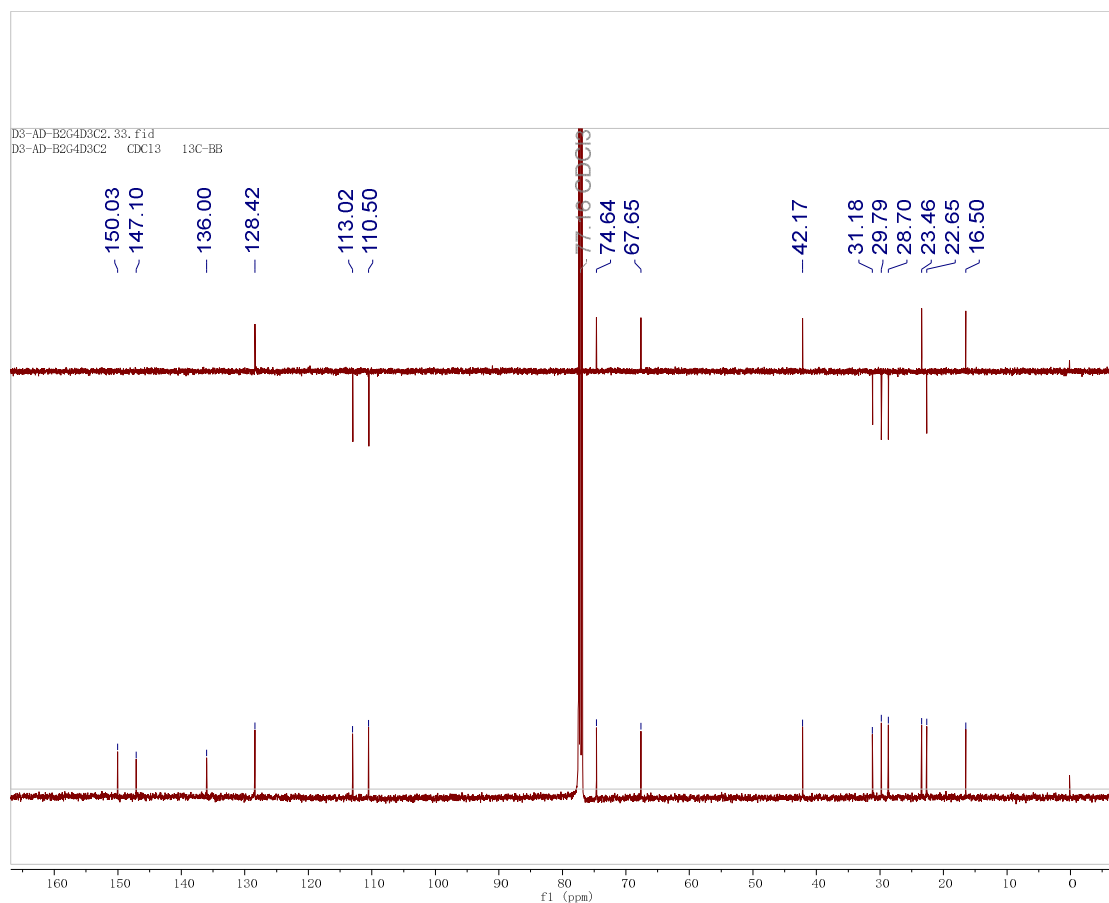

Figure S51 <sup>13</sup>C NMR spectrum of compound 6

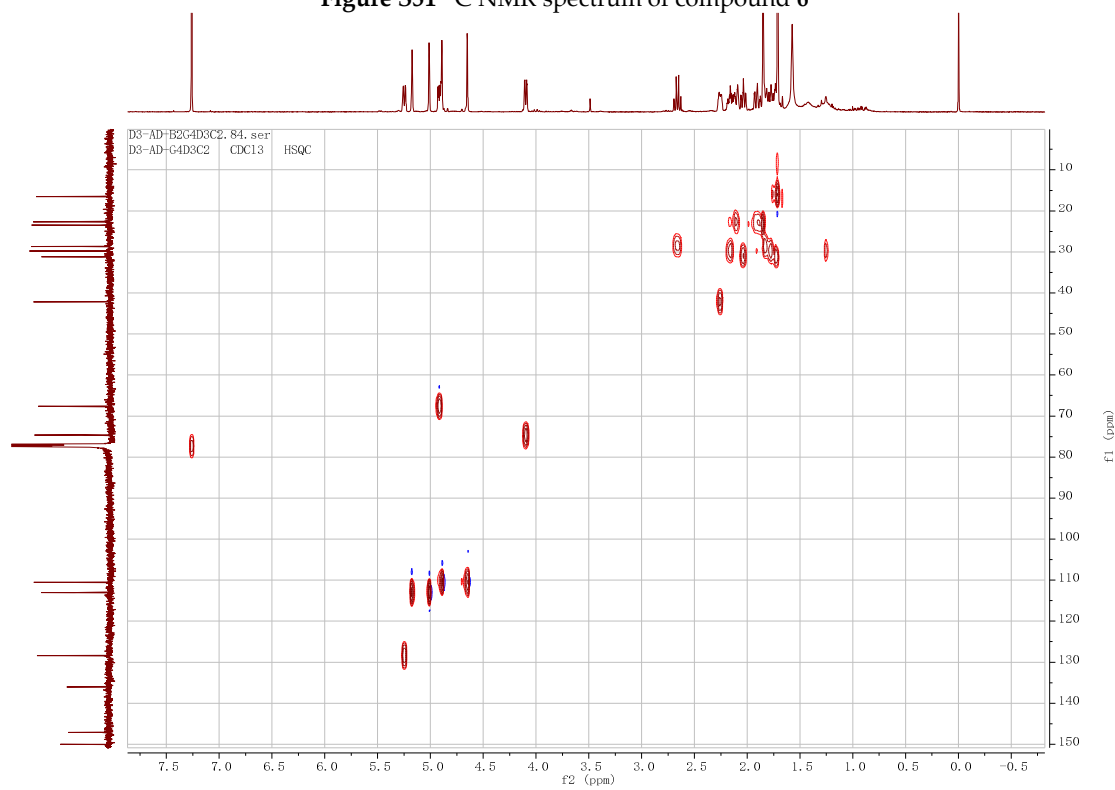

Figure S52 HSQC spectrum of compound 6

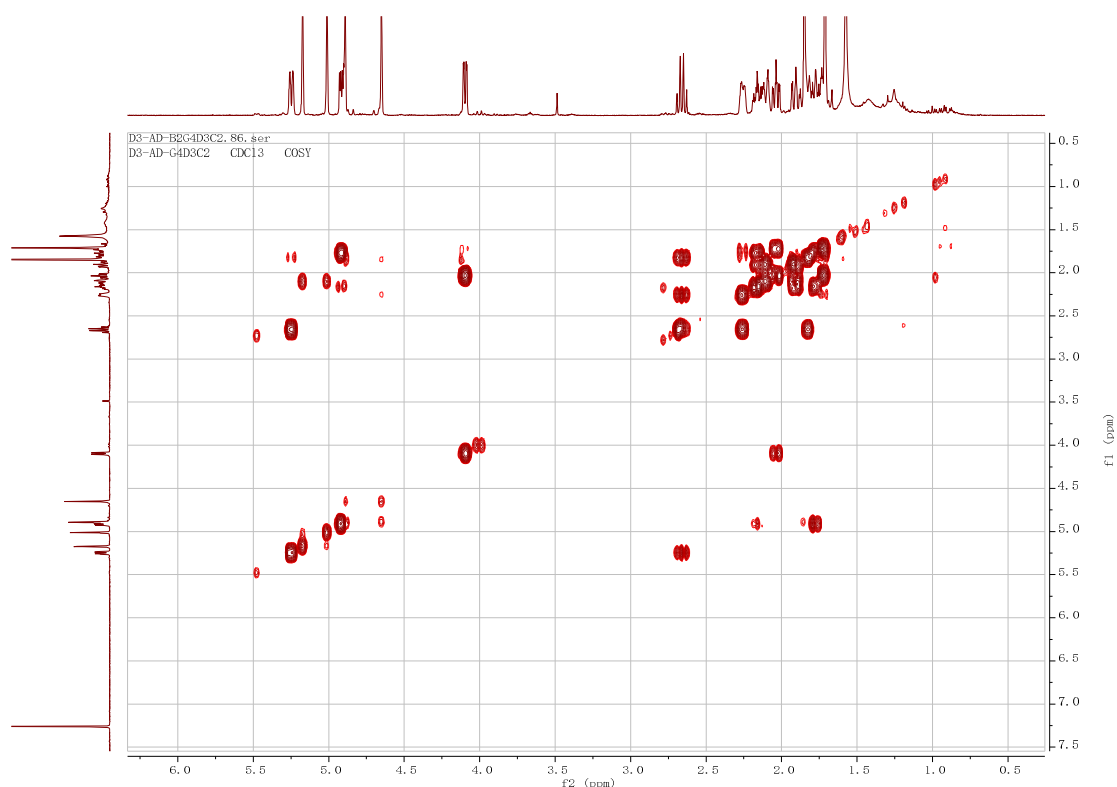

Figure S53  $^1\text{H}$ - $^1\text{H}$  COSY spectrum of compound 6

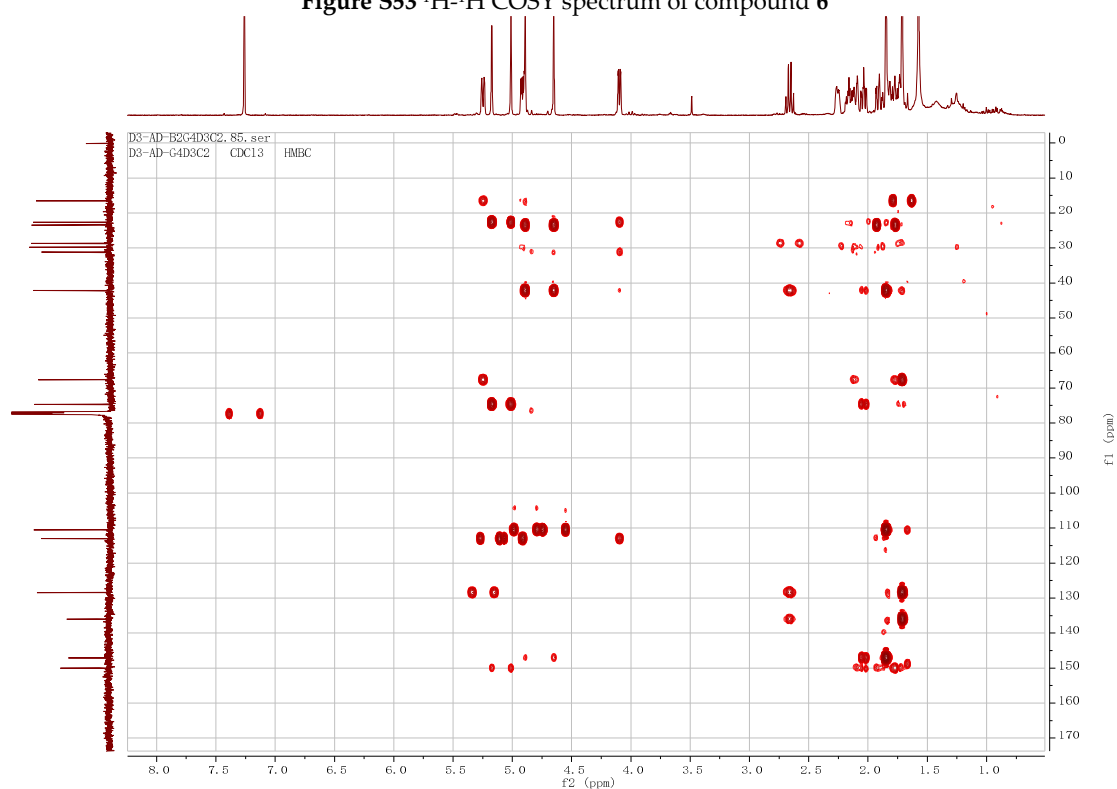

Figure S54 HMBC spectrum of compound 6

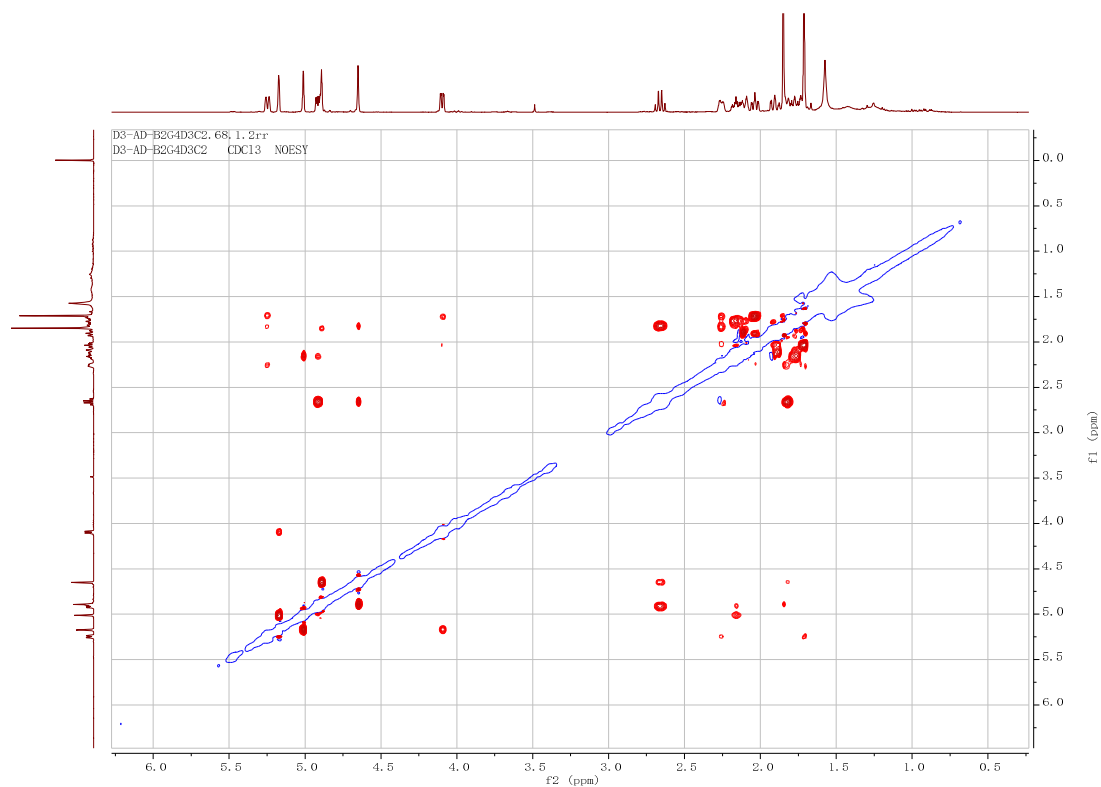

Figure S55 NOESY spectrum of compound 6

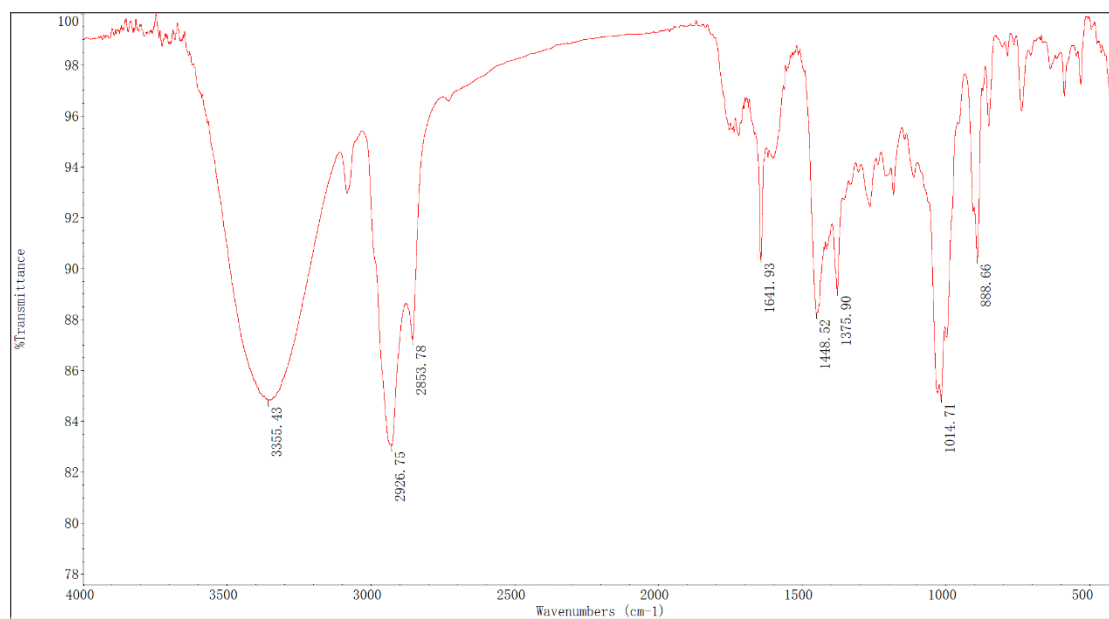

Figure S56 IR spectrum of compound 6

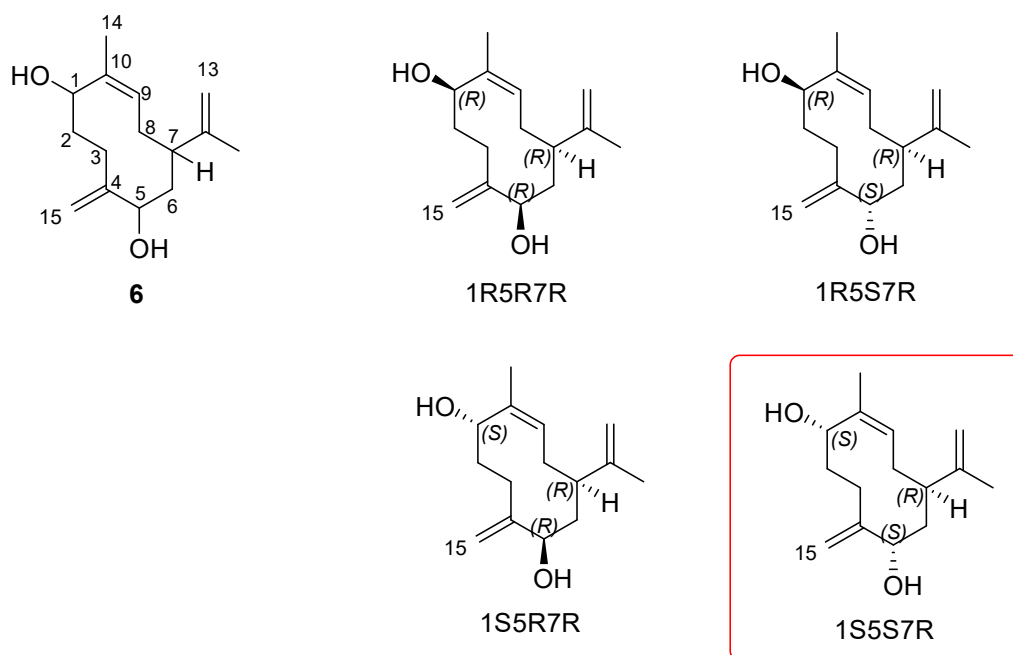

Figure S57 Possible isomers of compound 6

| Functional       | Solvent? |          | Basis Set    |          |
|------------------|----------|----------|--------------|----------|
| mPW1PW91         | PCM      |          | 6-311G(d, p) |          |
|                  | Isomer 1 | Isomer 2 | Isomer 3     | Isomer 4 |
| SDP4+ (H data)   | 1.36%    | 0.58%    | 0.00%        | 98.06%   |
| SDP4+ (C data)   | 0.03%    | 0.00%    | 0.00%        | 99.97%   |
| SDP4+ (all data) | 0.00%    | 0.00%    | 0.00%        | 100.00%  |
| uDP4+ (H data)   | 2.31%    | 0.00%    | 0.00%        | 97.69%   |
| uDP4+ (C data)   | 0.04%    | 0.00%    | 0.00%        | 99.95%   |
| uDP4+ (all data) | 0.00%    | 0.00%    | 0.00%        | 100.00%  |
| DP4+ (H data)    | 0.03%    | 0.00%    | 0.00%        | 99.97%   |
| DP4+ (C data)    | 0.00%    | 0.00%    | 0.00%        | 100.00%  |
| DP4+ (all data)  | 0.00%    | 0.00%    | 0.00%        | 100.00%  |

Figure S58 DP4+ probability statistics of compound 6

# Elemental Composition Report

Tolerance = 5.0 PPM / DBE: min = -1.5, max = 50.0

Element prediction: Off

Number of isotope peaks used for i-FIT = 3

Monoisotopic Mass, Even Electron Ions

22 formula(e) evaluated with 1 results within limits (up to 50 best isotopic matches for each mass)

Elements Used:

C: 0-200 H: 0-60 O: 0-6

Minimum: 80.00

Maximum: 100.00

| Mass     | RA     | Calc. Mass | mDa  | PPM  | DBE | i-FIT | Norm | Conf(%) | Formula                           |
|----------|--------|------------|------|------|-----|-------|------|---------|-----------------------------------|
| 219.1743 | 100.00 | 219.1749   | -0.6 | -2.7 | 4.5 | 695.9 | n/a  | n/a     | C <sub>15</sub> H <sub>23</sub> O |

YSQ

20230203\_S030 799 (5.837)

1: TOF MS ES+

3.17e+005

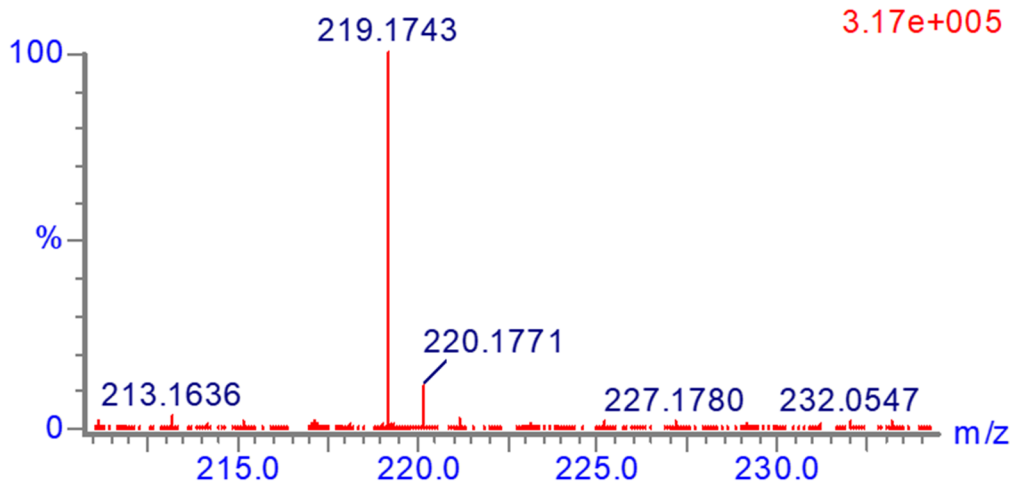

Figure S59 HR-ESIMS spectrum of compound 7

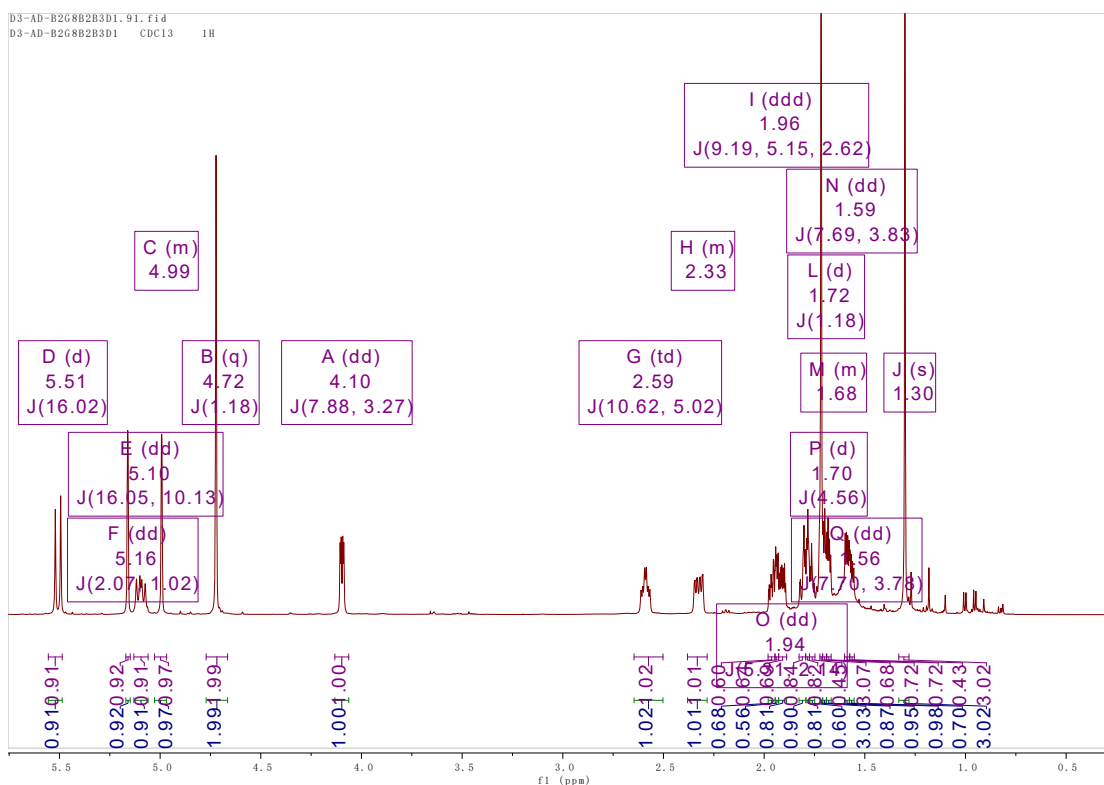

Figure S60 <sup>1</sup>H NMR spectrum of compound 7

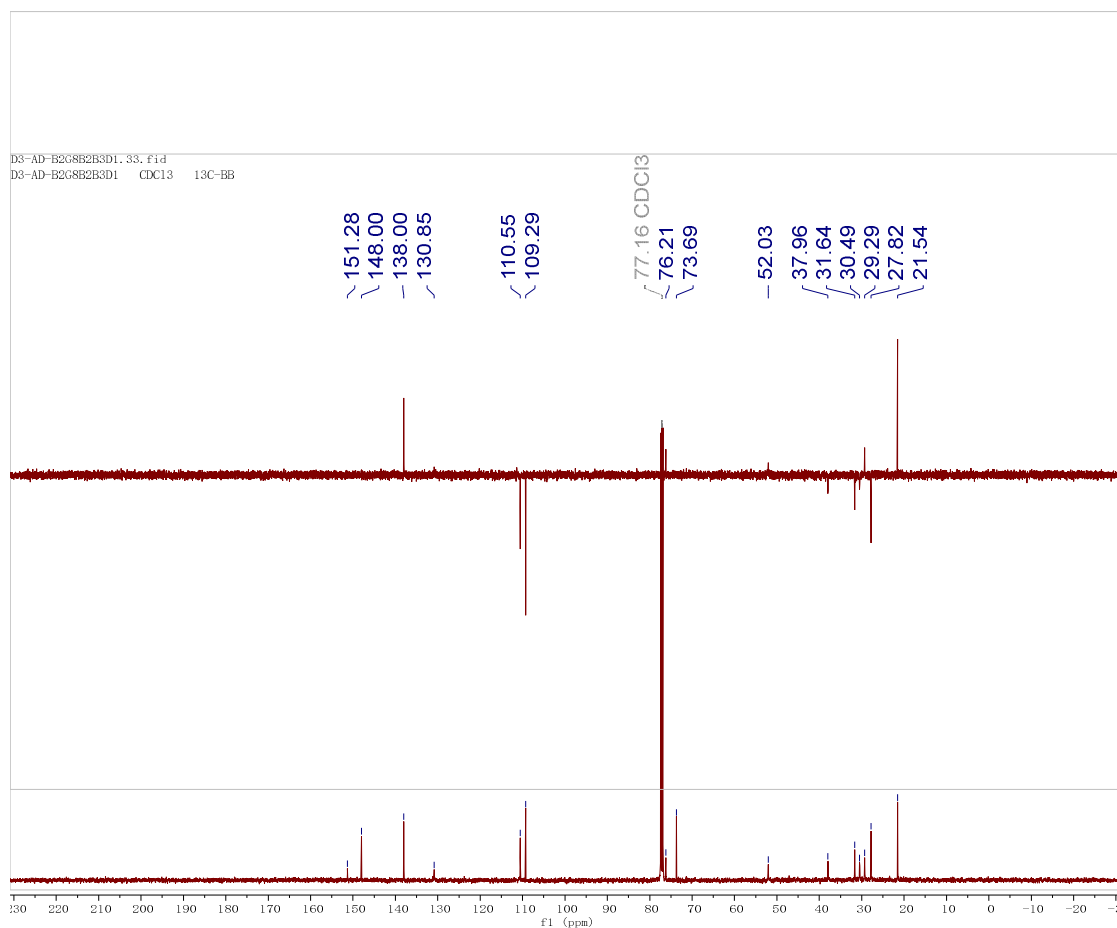

Figure S61 <sup>13</sup>C NMR spectrum of compound 7

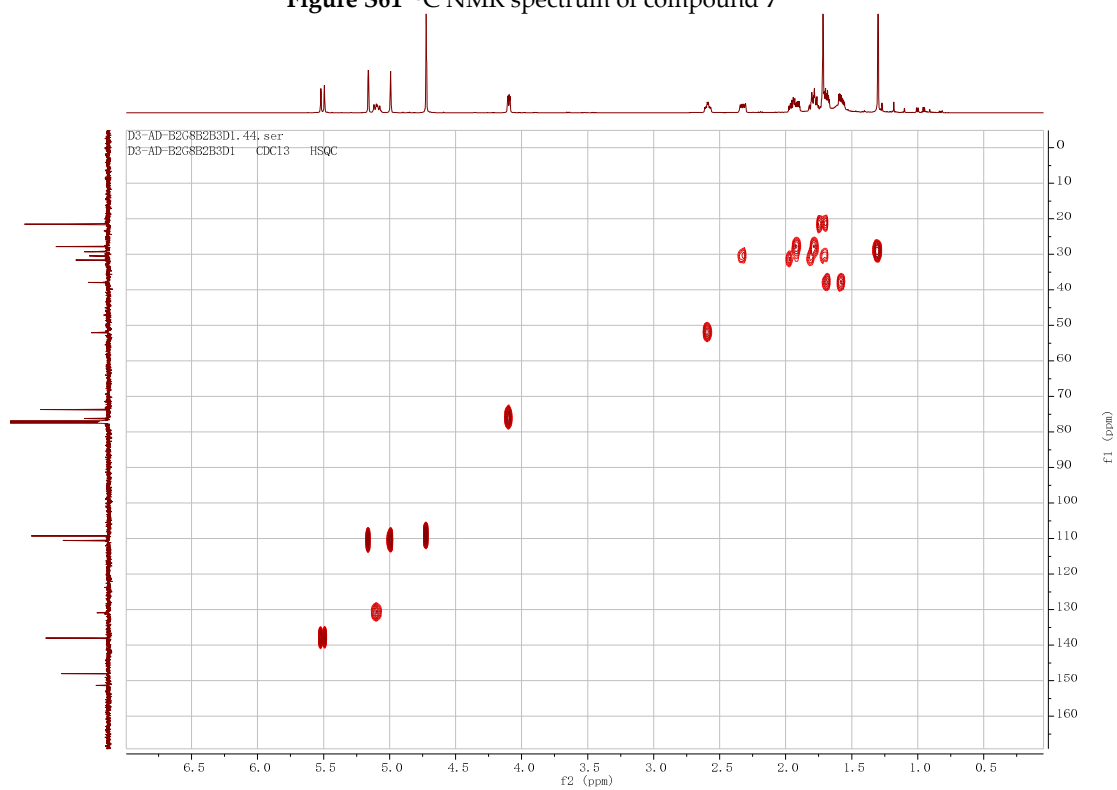

Figure S62 HSQC spectrum of compound 7

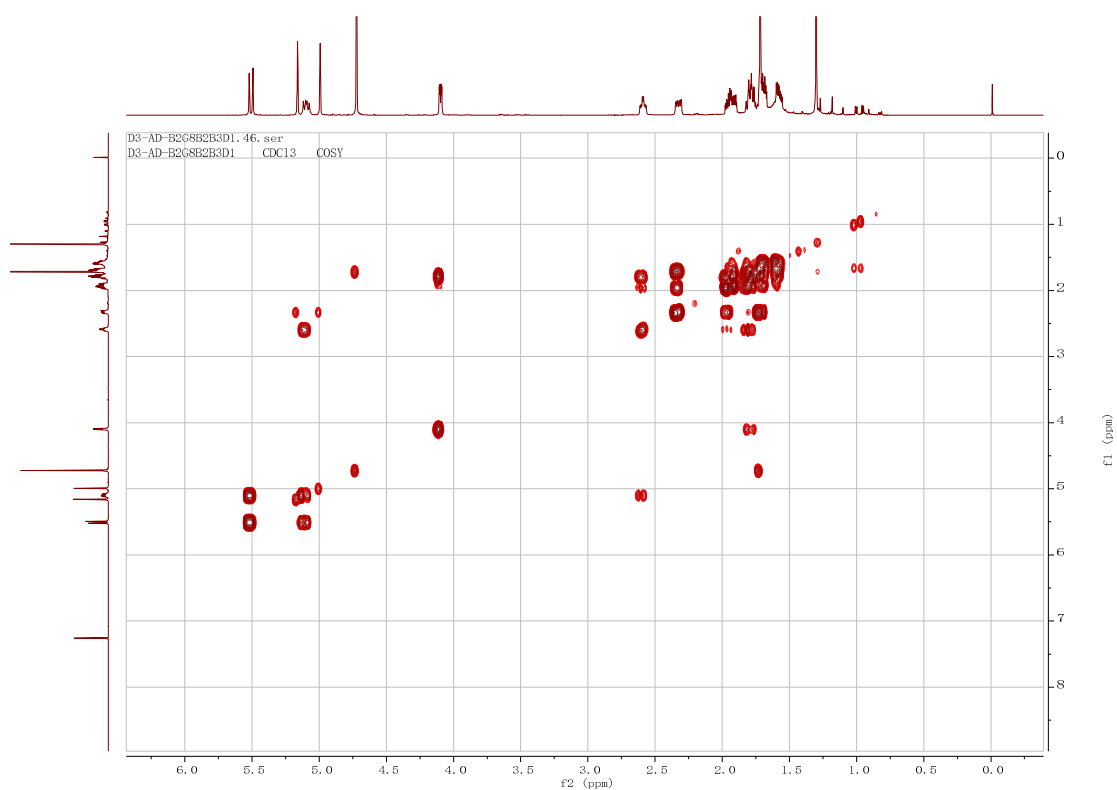

Figure S63  $^1\text{H}$ - $^1\text{H}$  COSY spectrum of compound 7

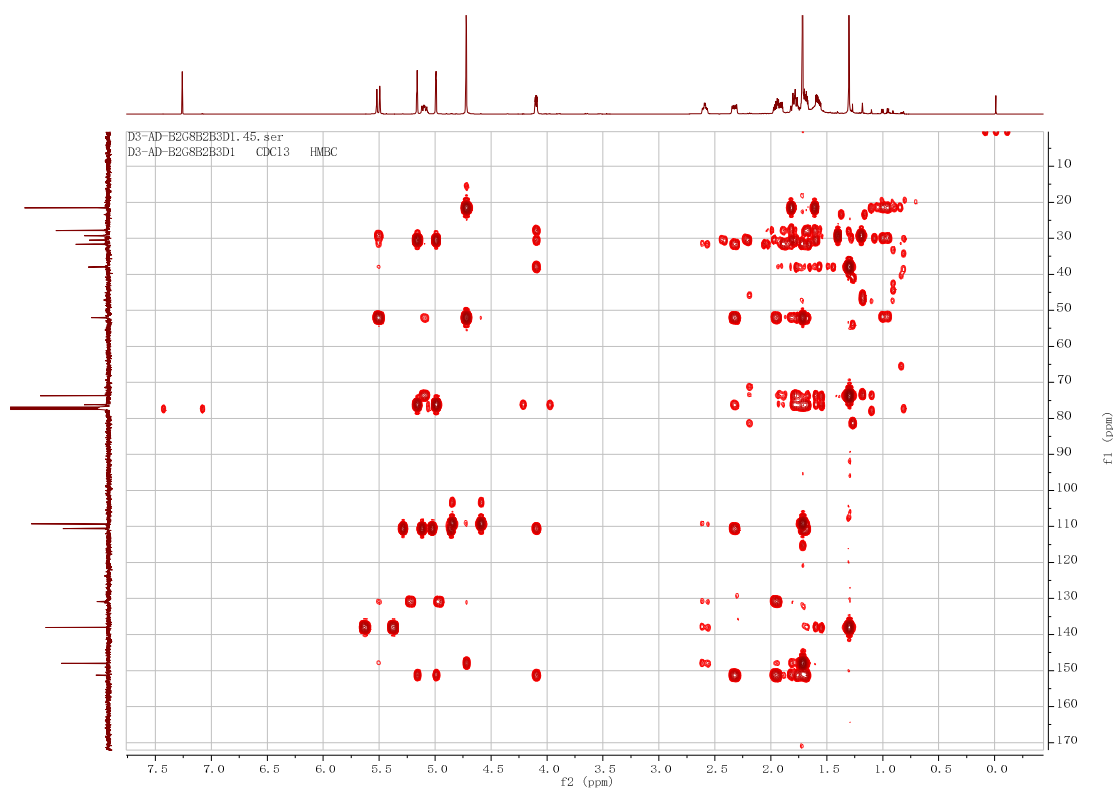

Figure S64 HMBC spectrum of compound 7



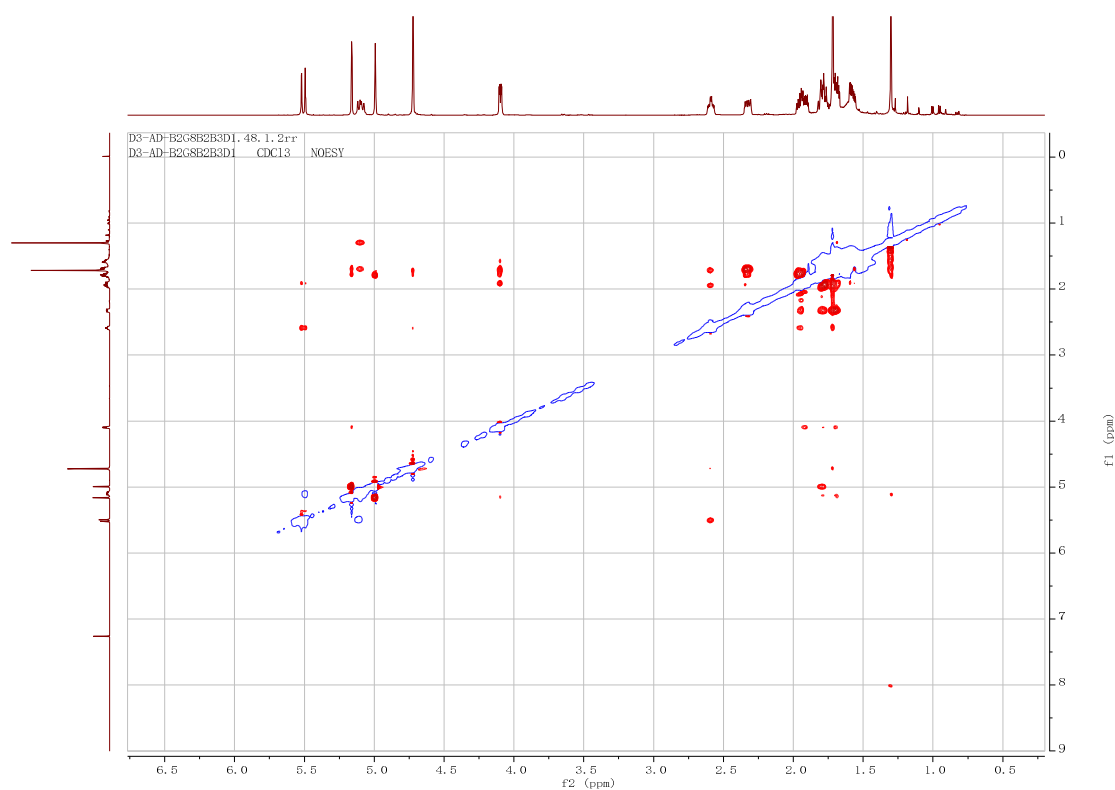

Figure S65 NOESY spectrum of compound 7

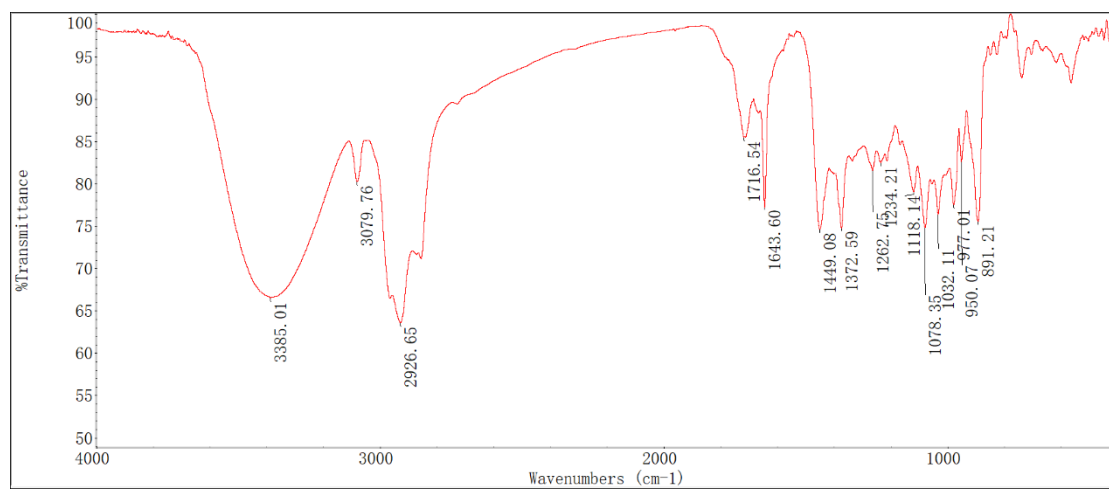

Figure S66 IR spectrum of compound 7

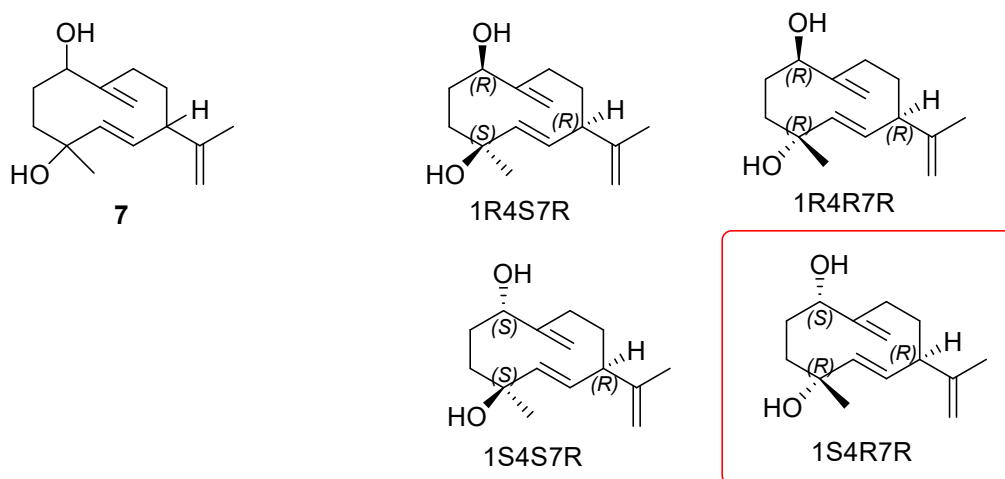

Figure S67 Possible isomers of compound 7

| Functional<br>mPW1PW91 | Solvent?<br>PCM |          | Basis Set<br>6-311G(d, p) |          |
|------------------------|-----------------|----------|---------------------------|----------|
|                        | Isomer 1        | Isomer 2 | Isomer 3                  | Isomer 4 |
| sDP4+ (H data)         | 56.38%          | 3.53%    | 39.68%                    | 0.41%    |
| sDP4+ (C data)         | 0.01%           | 0.00%    | 99.95%                    | 0.05%    |
| sDP4+ (all data)       | 0.01%           | 0.00%    | 99.99%                    | 0.00%    |
| uDP4+ (H data)         | 73.73%          | 0.16%    | 15.74%                    | 10.38%   |
| uDP4+ (C data)         | 0.01%           | 0.00%    | 99.99%                    | 0.00%    |
| uDP4+ (all data)       | 0.04%           | 0.00%    | 99.96%                    | 0.00%    |
| DP4+ (H data)          | 86.85%          | 0.01%    | 13.05%                    | 0.09%    |
| DP4+ (C data)          | 0.00%           | 0.00%    | 100.00%                   | 0.00%    |
| DP4+ (all data)        | 0.00%           | 0.00%    | 100.00%                   | 0.00%    |

Figure S68 DP4+ probability statistics of compound 7

# Elemental Composition Report

Tolerance = 5.0 PPM / DBE: min = -1.5, max = 50.0

Element prediction: Off

Number of isotope peaks used for i-FIT = 3

Monoisotopic Mass, Even Electron Ions

22 formula(e) evaluated with 1 results within limits (up to 50 best isotopic matches for each mass)

Elements Used:

C: 0-200 H: 0-60 O: 0-6

Minimum: 80.00

Maximum: 100.00

| Mass     | RA     | Calc. Mass | mDa  | PPM  | DBE | i-FIT | Norm | Conf(%) | Formula                           |
|----------|--------|------------|------|------|-----|-------|------|---------|-----------------------------------|
| 219.1745 | 100.00 | 219.1749   | -0.4 | -1.8 | 4.5 | 582.0 | n/a  | n/a     | C <sub>15</sub> H <sub>23</sub> O |

YSQ

20230203\_S029 798 (5.830)

1: TOF MS ES+  
2.34e+005

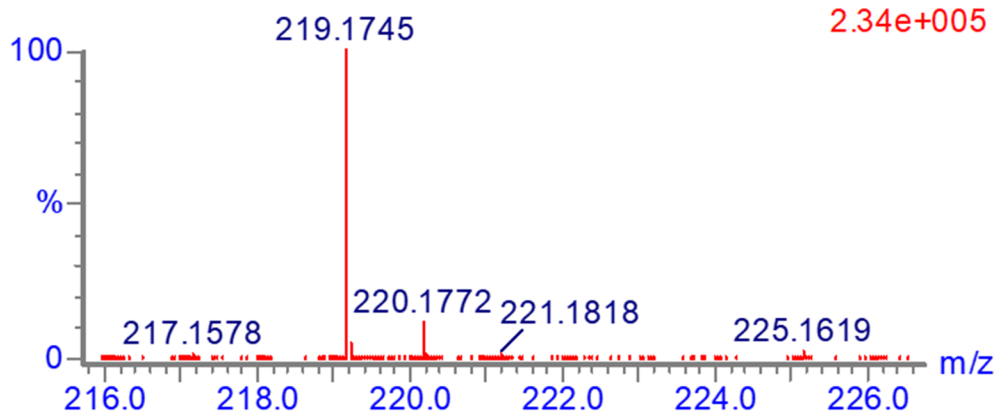

Figure S69 HR-ESIMS spectrum of compound 8

Figure S70 <sup>1</sup>H NMR spectrum of compound 8

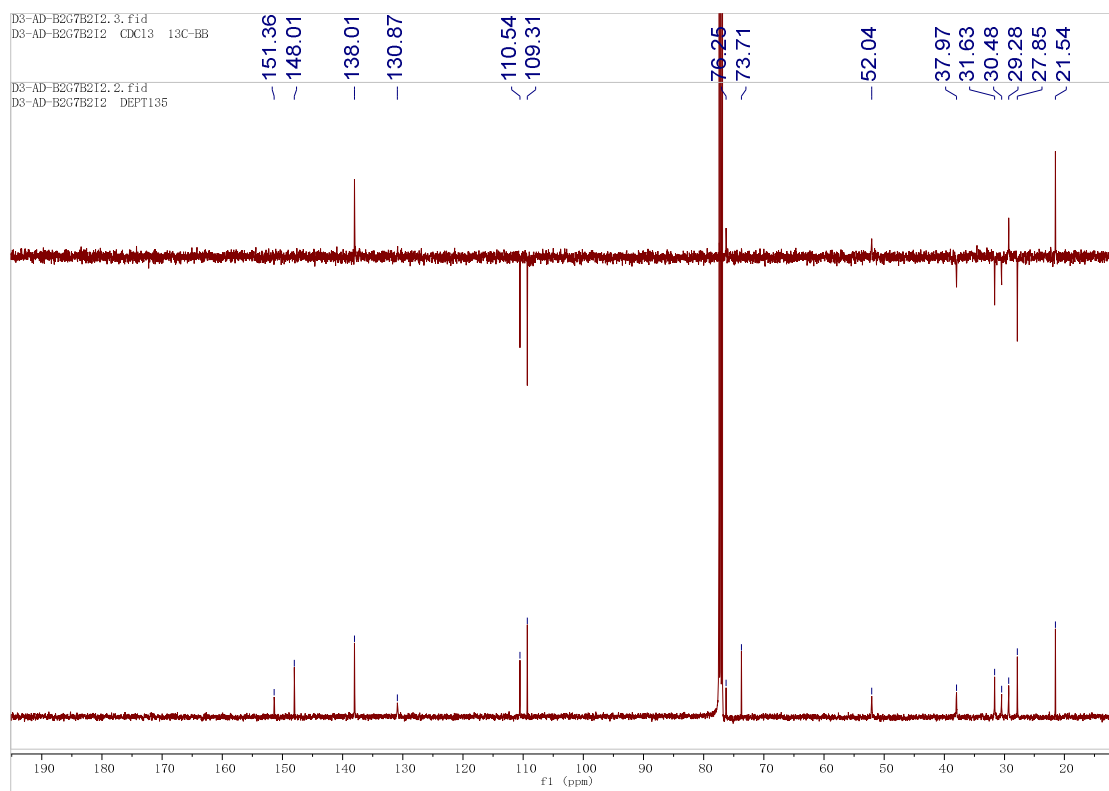

**Figure S71**  $^{13}\text{C}$  NMR spectrum of compound 8

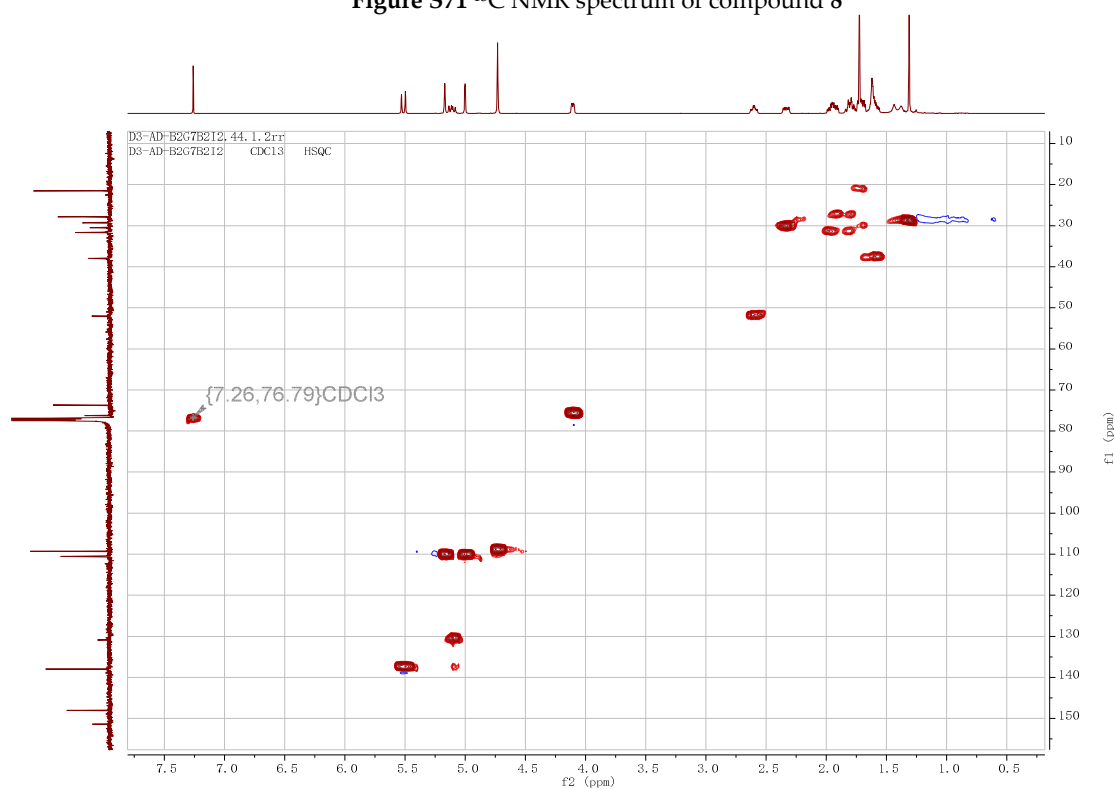

**Figure S72** HSQC spectrum of compound 8

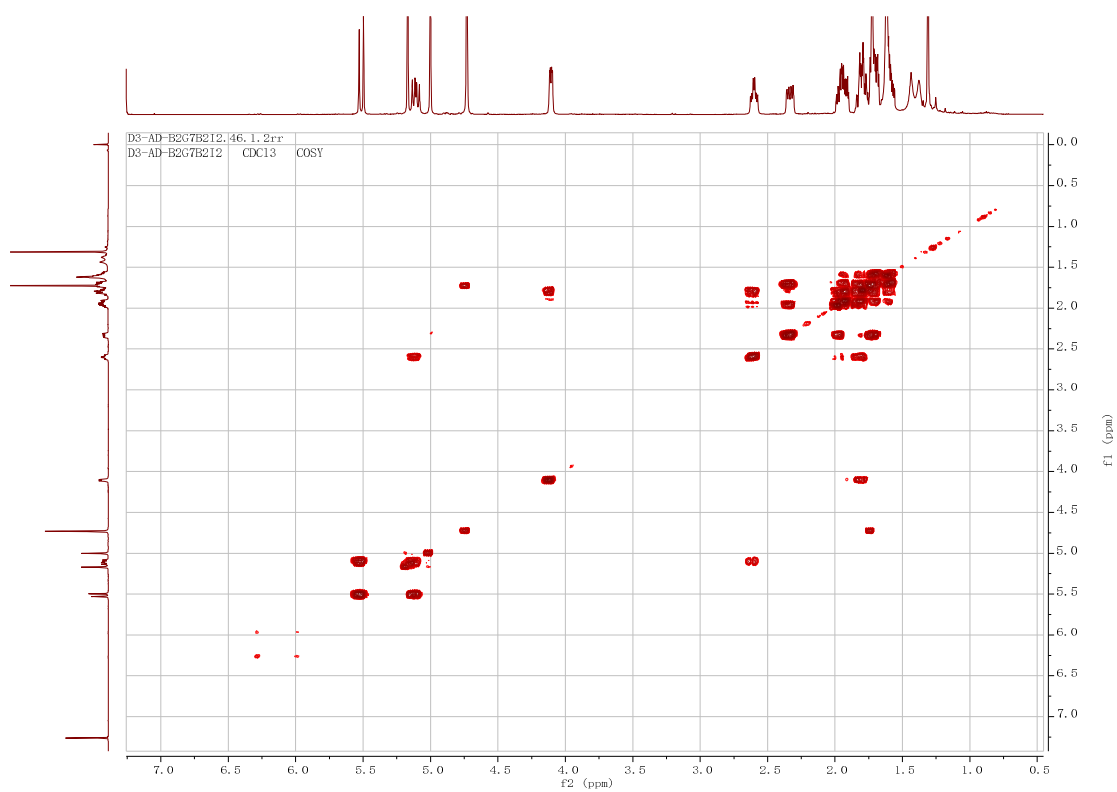

Figure S73  $^1\text{H}$ - $^1\text{H}$  COSY spectrum of compound 8

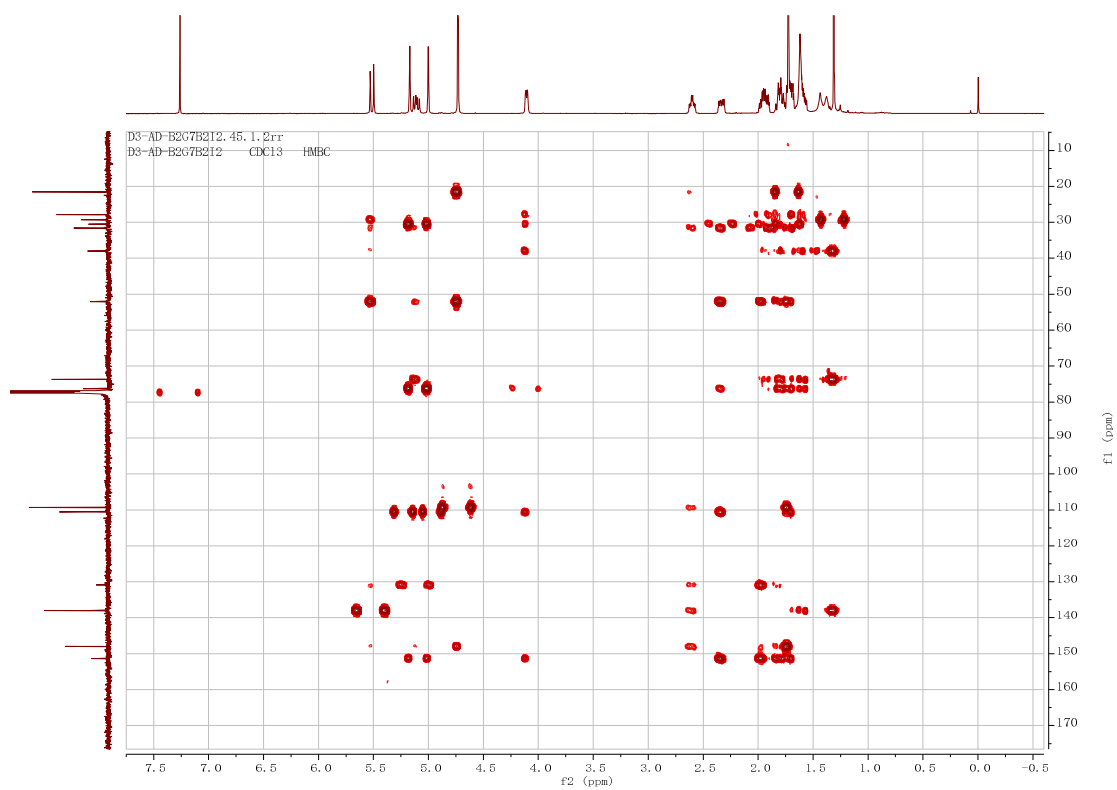

Figure S74 HMBC spectrum of compound 8

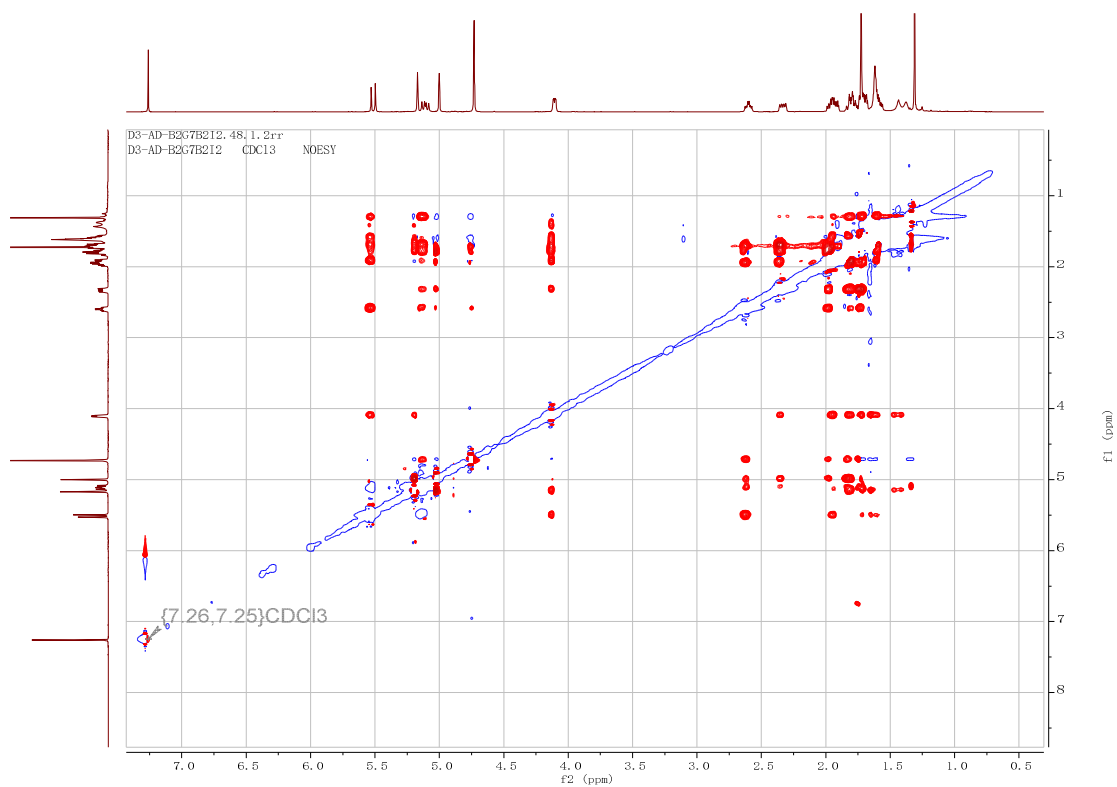

Figure S75 NOESY spectrum of compound 8

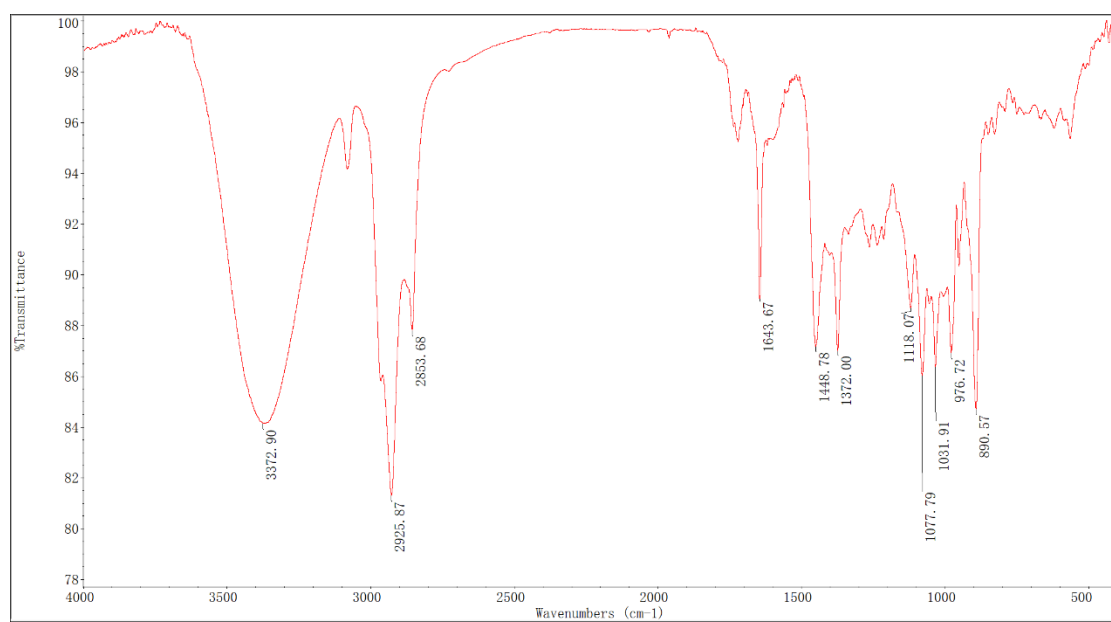

Figure S76 IR spectrum of compound 8

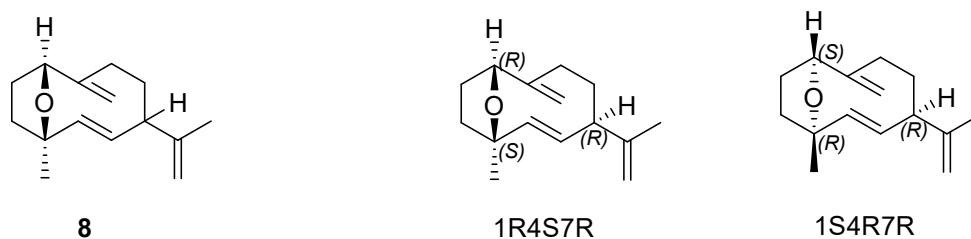

**Figure S77** Possible isomers of compound 8

| Functional       | Solvent?                                                                                  |                                                                                          | Basis Set     |          |
|------------------|-------------------------------------------------------------------------------------------|------------------------------------------------------------------------------------------|---------------|----------|
| mPW1PW91         | PCM                                                                                       |                                                                                          | 6-311G (d, p) |          |
|                  | Isomer 1                                                                                  | Isomer 2                                                                                 | Isomer 3      | Isomer 4 |
| sDP4+ (H data)   |  99.96%  |  0.04%  | —             | —        |
| sDP4+ (C data)   |  98.89%  |  1.11%  | —             | —        |
| sDP4+ (all data) |  100.00% |  0.00%  | —             | —        |
| uDP4+ (H data)   |  96.93%  |  3.07%  | —             | —        |
| uDP4+ (C data)   |  58.19%  |  41.81% | —             | —        |
| uDP4+ (all data) |  97.77%  |  2.23%  | —             | —        |
| DP4+ (H data)    |  100.00% |  0.00%  | —             | —        |
| DP4+ (C data)    |  99.20%  |  0.80%  | —             | —        |
| DP4+ (all data)  |  100.00% |  0.00%  | —             | —        |

**Figure S78** DP4+ probability statistics of compound 8

## Qualitative Analysis Report

|                        |                                        |                               |                             |
|------------------------|----------------------------------------|-------------------------------|-----------------------------|
| <b>Data Filename</b>   | ESI202301001-1.d                       | <b>Sample Name</b>            | D3-D3-AD-B2G7E2A4           |
| <b>Sample ID</b>       |                                        | <b>Position</b>               | P1-A1                       |
| <b>Instrument Name</b> | Agilent G6520 Q-TOF                    | <b>Acq Method</b>             | 20160322_MS_ESIH_POS_1min.m |
| <b>Acquired Time</b>   | 2/17/2023 10:47:37                     | <b>IRM Calibration Status</b> | Success                     |
| <b>DA Method</b>       | small molecular data analysis method.m | <b>Comment</b>                | ESIH by fangsuo             |

### User Spectra

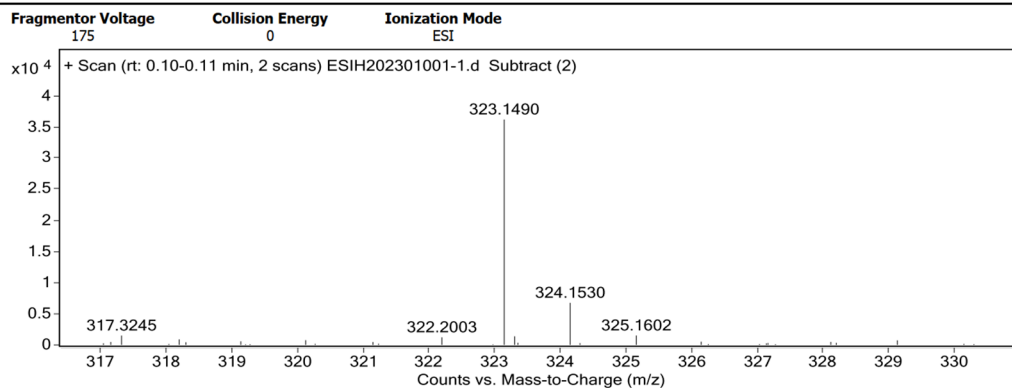

### Formula Calculator Results

| m/z     | Calc m/z | Diff (mDa) | Diff (ppm) | Ion Formula | Ion    |
|---------|----------|------------|------------|-------------|--------|
| 323.149 | 323.1489 | -0.07      | -0.22      | C17 H23 O6  | (M+H)+ |

Figure S79 HR-ESIMS spectrum of compound 9

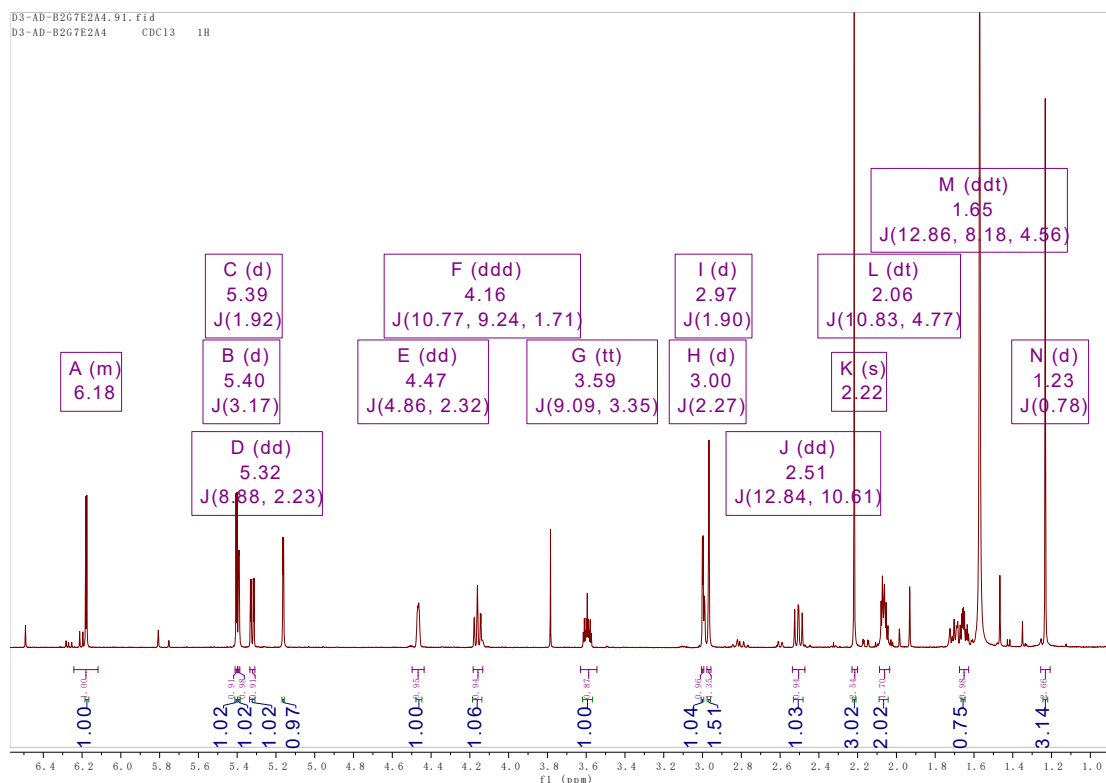

Figure S80 <sup>1</sup>H NMR spectrum of compound 9



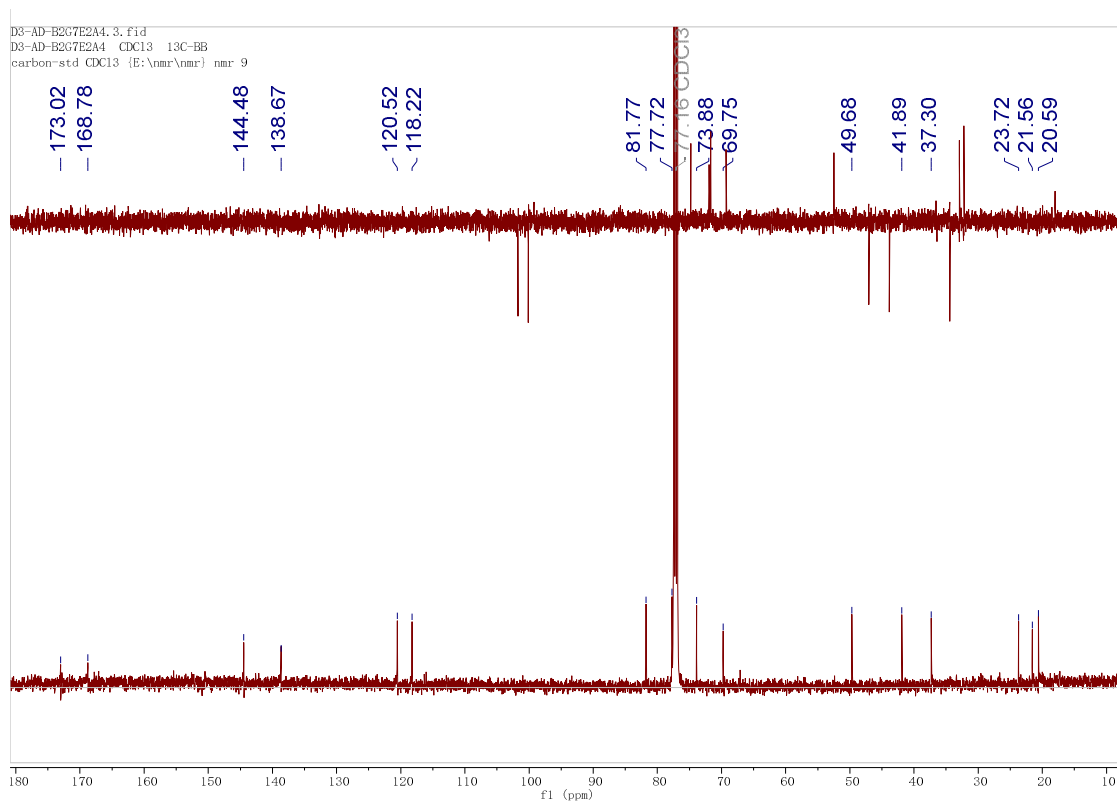

Figure S81 <sup>13</sup>C NMR spectrum of compound 9

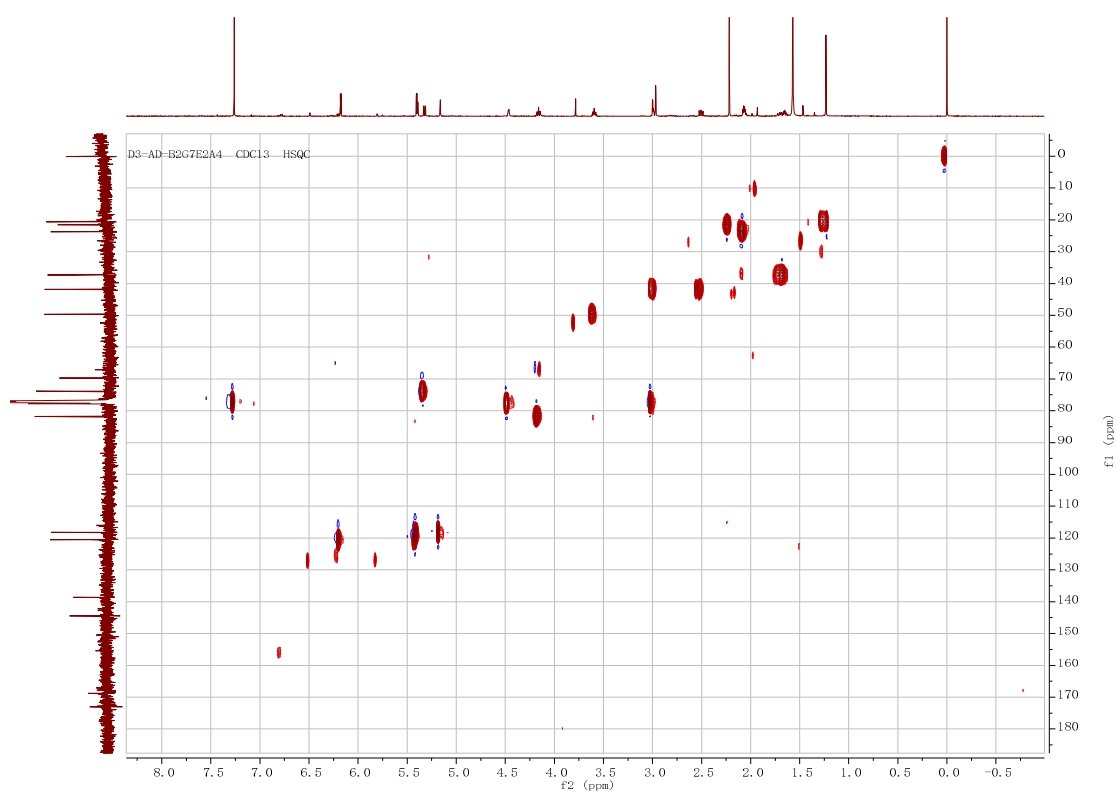

Figure S82 HSQC spectrum of compound 9

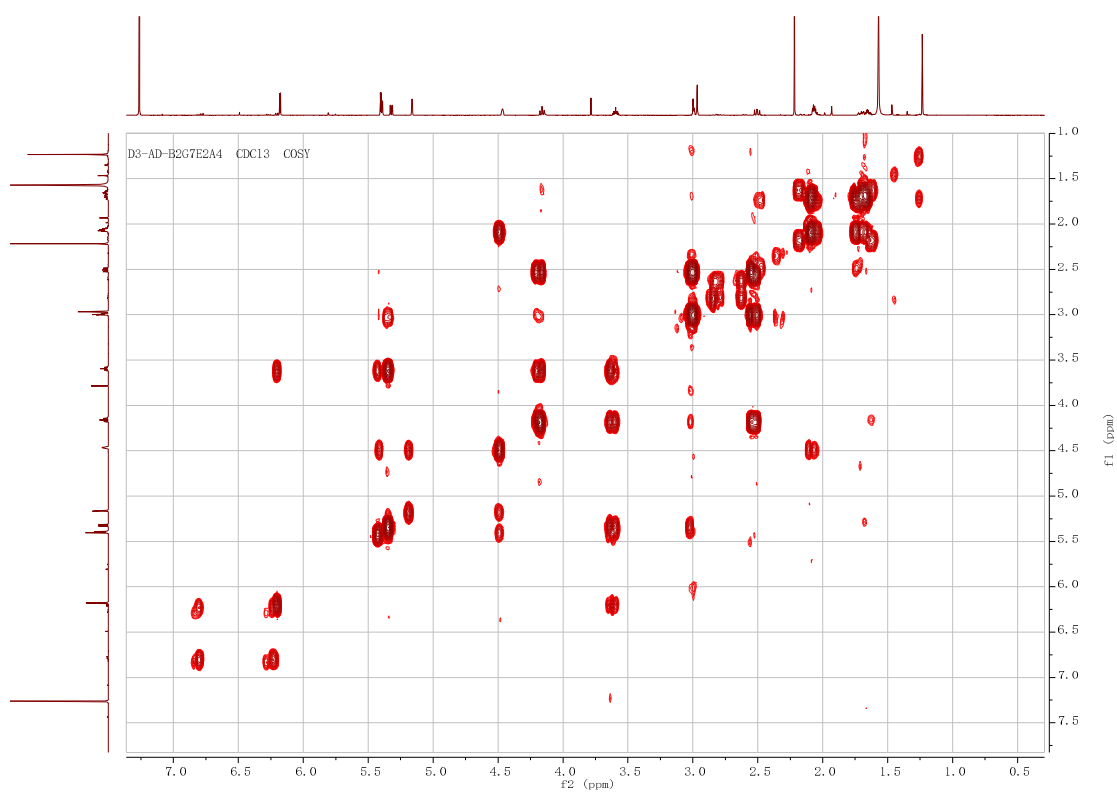

Figure S83  $^1\text{H}$ - $^1\text{H}$  COSY spectrum of compound 9

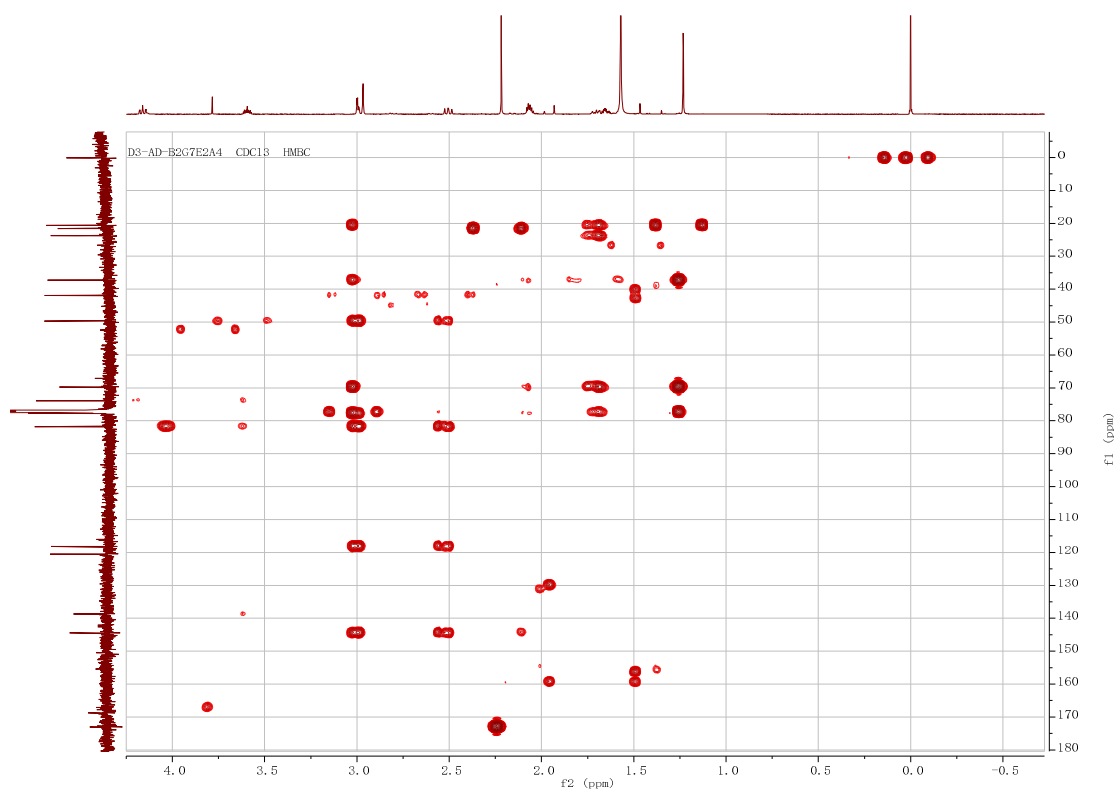

Figure S84 HMBC spectrum of compound 9

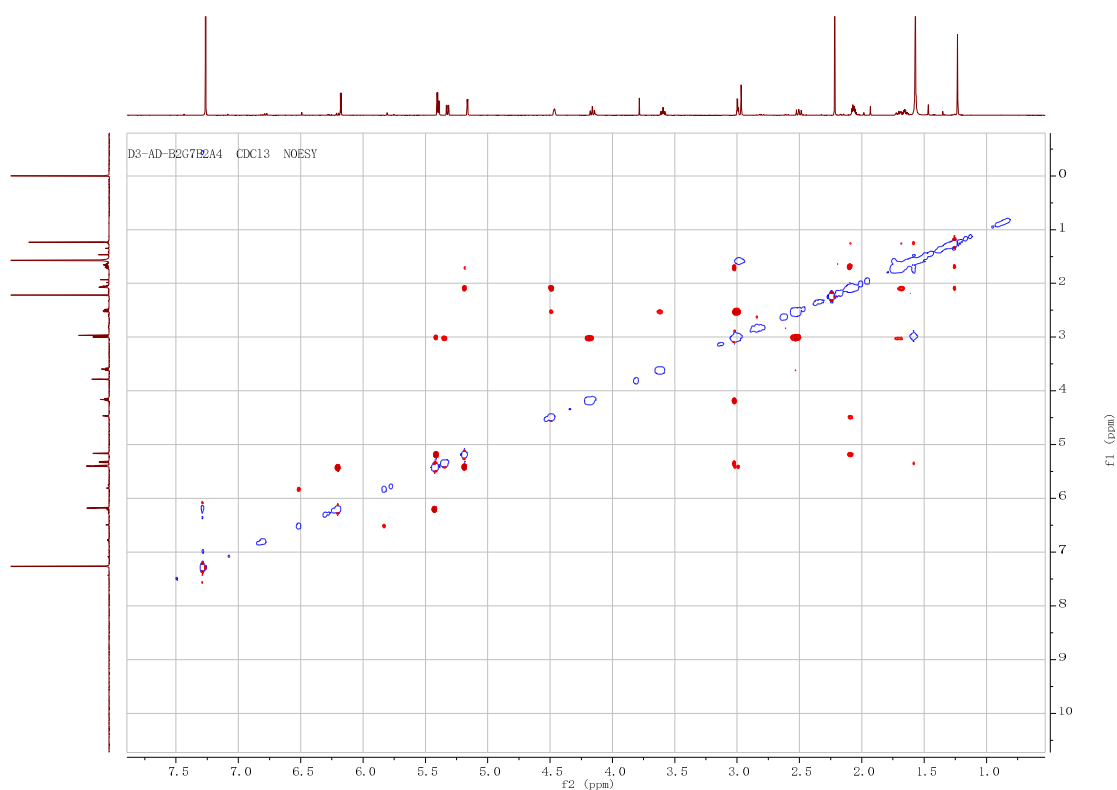

Figure S85 NOESY spectrum of compound 9

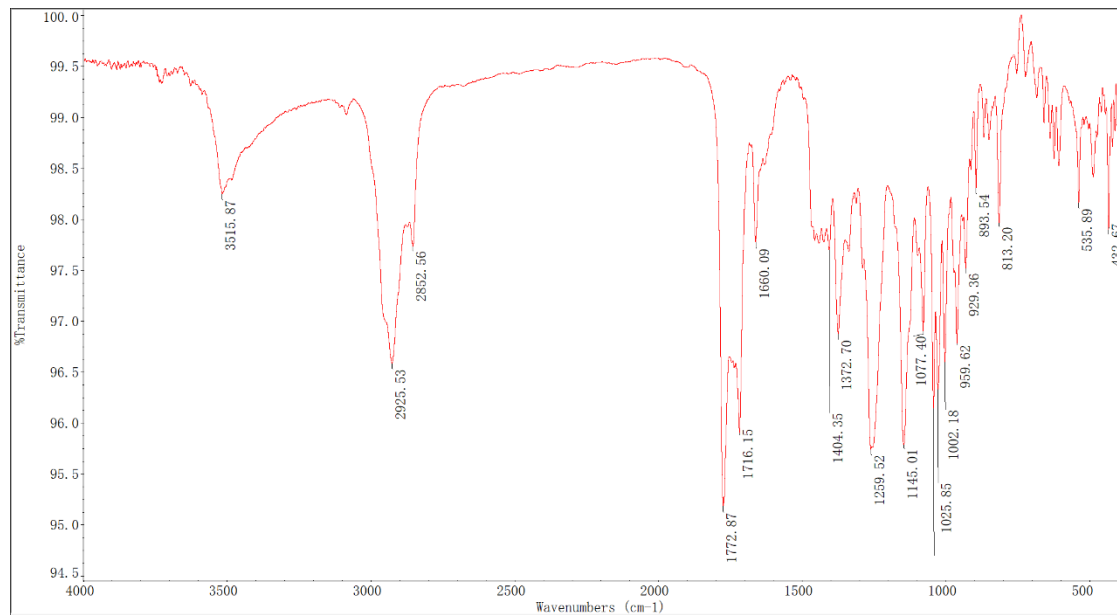

Figure S86 IR spectrum of compound 9

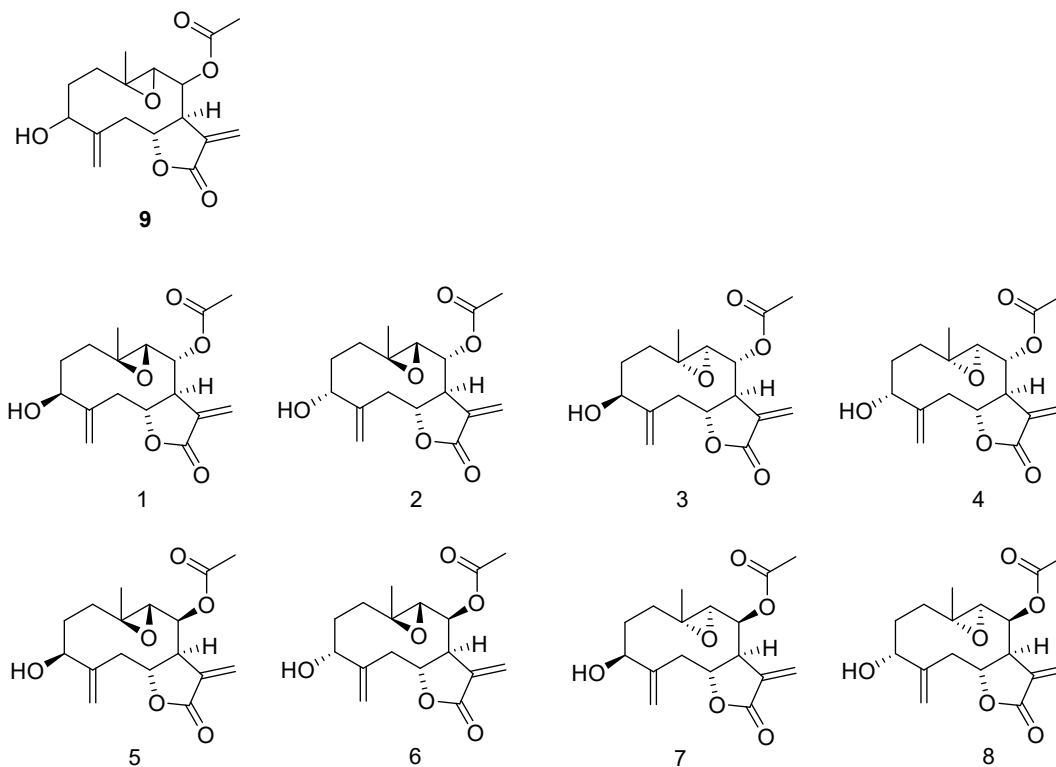

**Figure S87** Possible isomers of compound **9**

| Functional       | Solvent? | Basis Set    |          | Type of Data      |          |          |          |          |
|------------------|----------|--------------|----------|-------------------|----------|----------|----------|----------|
| mPW1PW91         | PCM      | 6-311G(d, p) |          | Shielding Tensors |          |          |          |          |
|                  | Isomer 1 | Isomer 2     | Isomer 3 | Isomer 4          | Isomer 5 | Isomer 6 | Isomer 7 | Isomer 8 |
| sDP4+ (H data)   | 0.02%    | 16.99%       | 0.00%    | 0.01%             | 0.00%    | 82.37%   | 0.57%    | 0.04%    |
| sDP4+ (C data)   | 0.07%    | 44.23%       | 0.02%    | 6.19%             | 0.11%    | 0.01%    | 49.37%   | 0.00%    |
| sDP4+ (all data) | 0.00%    | 96.29%       | 0.00%    | 0.01%             | 0.00%    | 0.10%    | 3.60%    | 0.00%    |
| uDP4+ (H data)   | 0.05%    | 96.23%       | 0.00%    | 0.00%             | 0.00%    | 3.58%    | 0.13%    | 0.02%    |
| uDP4+ (C data)   | 1.04%    | 9.56%        | 0.31%    | 2.18%             | 19.70%   | 38.83%   | 28.27%   | 0.11%    |
| uDP4+ (all data) | 0.00%    | 86.59%       | 0.00%    | 0.00%             | 0.00%    | 13.07%   | 0.34%    | 0.00%    |
| DP4+ (H data)    | 0.00%    | 84.73%       | 0.00%    | 0.00%             | 0.00%    | 15.26%   | 0.00%    | 0.00%    |
| DP4+ (C data)    | 0.00%    | 23.05%       | 0.00%    | 0.74%             | 0.11%    | 0.02%    | 76.07%   | 0.00%    |
| DP4+ (all data)  | 0.00%    | 99.97%       | 0.00%    | 0.00%             | 0.00%    | 0.02%    | 0.01%    | 0.00%    |

**Figure S88** DP4+ probability statistics of compound **9**
